# Supplementary material for: Nutrient substitution for secondary fertilizer: Is current practice comprehensive enough? A review to reveal the LCA methodological challenges
Source: Springer Nature journal article supplement (doi:10.1007/s11367-023-02248-9), 2023-12-27
Supplement: MOESM1 [file 11367_2023_2248_MOESM1_ESM.xlsx]

## Sheet: Manual
		Abbreviation						Color indicator - Topic
		inex.	inexplicitly					Input
		WOS	Web of Science					Output
		S	Scopus					General info
		AD	Anaerobic digestion					Avoided product
		ACoD	Anaerobic co-digestion					Substitution principle
		HTC	Hydrothermal carbonization					Sensitivity analysis
		WWTP	Wastewater treatment plant					Use on Land
		UoL	Use on Land
		WtE	Waste to Energy
		PNA	Plant nutrient availability
		?	Not mentioned
		SA	Sensitivity analysis
		/	not applicable
		PNU	Plant nutrient uptake
		PNR	plant nutrient requirement
		SR	Substitution rate
		FU	Functional unit

## Sheet: Method
	Searching strategy
	Database	Search date	Search strategy	Result
	Web of Science	2021-05-03	TOPIC: ((LCA OR “life cycle assessment” OR “life cycle analysis”) AND (recycl* OR recover*) AND (waste* OR sludge)) NOT TOPIC: ((alga* or aqua* or hydroponic* )) Refined by: TOPIC: ((nutrient* or phosph* or nitr*) and (fertili* or “land application”)) AND DOCUMENT TYPES: ( ARTICLE ) Timespan: All years. Indexes: SCI-EXPANDED, SSCI, A&HCI, ESCI.	108
	Scopus	2021-05-06	( ( KEY ( lca OR "life AND cycle AND assessment" OR "life AND cycle AND analysis" ) AND TITLE-ABS-KEY ( recycl* OR recover* ) AND TITLE-ABS-KEY ( waste* OR sludge ) AND NOT TITLE-ABS-KEY ( alga* OR aqua* OR hydroponic* ) ) ) AND ( ( nutrient* OR phosph* OR nitr* ) AND ( fertili* OR “land AND application” ) ) AND ( LIMIT-TO ( DOCTYPE , "ar" ) ) AND ( LIMIT-TO ( LANGUAGE , "English" ) )	173
	Corpus analysis
	Category	Web of science	Scopus	Total		*No nutrient substition: using allocation, cut-off or system expansion to solve multifunctionality; not considering secondary fertilizer replacing primary fertilizer
	Total	108	173	281
	Duplicates	/	38	38
	Article type (conference paper, doctoral thesis, etc.)	3	4	7
	Not CA case study	23	12	35
	Topic irrelevant	10	55	65
	No nutrient substitution*	28	17	45
	Language	0	1	1
	Remains	44	46	90

## Sheet: Corpus
Number	Database	Author	Title	System modeling (ALCA/ CLCA)	Year	Primary Objective	Relevant practice	Name of the technology/ process	Brief description of the relevant recycling practice	Input material	Final product	Plant nutrient availability (PNA)	PNA Reference	Recycled nutrients	Avoided product	Avoided fertilizer type	Modeling reference	Substitution level	Substitution rate (SR)	SR reference	SR calculation principle	Constraining factor (CF)	CF type	Sensitivity analysis (SA) inclusion	Nutrient related parameter	If the parameter sensitive?	FU	Location	Use on Land inclusion	Use on Land emission replacement
1	WOS	Sena, M; Seib, M; Noguera, DR; Hicks, A	Environmental impacts of phosphorus recovery through struvite precipitation in wastewater treatment	ALCA (inex.)	2021	Nutrient recycling from WWTP	2	AD	Sludge from the wastewater treatment processes is further treated through thickening or additional P releasing process. The intermediate product is further directed to the AD. Biosolids from both steps are used as fertilizer.	Wastewater	Biosolids	70% 50%	Lundin et al. (2000)	N P	N fertilizer P fertilizer	UAN (Urea ammonium nitrate) TSP (Triple superphosphate)	Ecoinvent	Nutrient	?	Lundin et al. (2000)	Single constraining factor	PNA	Internal	Yes	No	No	Dual: Per cubic meter of wastewater treated + per kg of struvite recovered	U.S.	No	/
1		Sena, M; Seib, M; Noguera, DR; Hicks, A	Environmental impacts of phosphorus recovery through struvite precipitation in wastewater treatment	ALCA (inex.)	2021	Nutrient recycling from WWTP	2	Ostara Pearl	Struvite precipitation from the P releasing treatment of the sludge	Wastewater	Struvite	As commercial fertilizer (inex.)	Ostara Nutrient Recovery Technologies Inc., n.d.	N P	N fertilizer P fertilizer	UAN (Urea ammonium nitrate) TSP (Triple superphosphate)	Ecoinvent	Nutrient	?	Ostara Nutrient Recovery Technologies Inc., n.d.	Single constraining factor	PNA	Internal		Struvite offset amount	Yes, in all categories except for ozone depletion, global warming, smog.	Dual: Per cubic meter of wastewater treated + per kg of struvite recovered	U.S.	No	/
2	WOS	Jiang, Y; Zhang, YZ; Wang, S; Wang, ZZ; Liu, YC; Hu, ZH; Zhan, XM	Improved environmental sustainability and bioenergy recovery through pig manure and food waste on-farm co-digestion in Ireland	?	2021	Integrated biowastes management	3	ACoD	Co-digestion of food waste and pig manure	Food waste Pig manure	Digestate	N: 43%	?	N P K	N fertilizer P fertilizer K fertilizer	Calcium ammonium nitrate Single superphosphate Potassium chloride	Ecoinvent	Nutrient	?	/	?	/	/	Yes	No	/	To handle the PM production of 16000 t/yr. produced from an average size pig farm and the available FW amount of 10000 t/yr.	Ireland	Yes	No
2		Jiang, Y; Zhang, YZ; Wang, S; Wang, ZZ; Liu, YC; Hu, ZH; Zhan, XM	Improved environmental sustainability and bioenergy recovery through pig manure and food waste on-farm co-digestion in Ireland	?	2021	Integrated biowastes management	3	AD	Mono-digestion of food waste	Food waste	Digestate	N: 32%	?	N P K	N fertilizer P fertilizer K fertilizer	Calcium ammonium nitrate Single superphosphate Potassium chloride	Ecoinvent	Nutrient	?	/	?	/	/		No	/	To handle the PM production of 16000 t/yr. produced from an average size pig farm and the available FW amount of 10000 t/yr.	Ireland	Yes	No
2		Jiang, Y; Zhang, YZ; Wang, S; Wang, ZZ; Liu, YC; Hu, ZH; Zhan, XM	Improved environmental sustainability and bioenergy recovery through pig manure and food waste on-farm co-digestion in Ireland	?	2021	Integrated biowastes management	3	Direct land application of pig manure	Direct land application of pig manure	Pig manure	Pig manure	N: 45%	?	N P K	N fertilizer P fertilizer K fertilizer	Calcium ammonium nitrate Single superphosphate Potassium chloride	Ecoinvent	Nutrient	?	/	?	/	/		No	/	To handle the PM production of 16000 t/yr. produced from an average size pig farm and the available FW amount of 10000 t/yr.	Ireland	Yes	No
2		Jiang, Y; Zhang, YZ; Wang, S; Wang, ZZ; Liu, YC; Hu, ZH; Zhan, XM	Improved environmental sustainability and bioenergy recovery through pig manure and food waste on-farm co-digestion in Ireland	?	2021	Integrated biowastes management	3	Composting	Composting of food waste	Food waste	Compost	N: 44%	?	N P K	N fertilizer P fertilizer K fertilizer	Calcium ammonium nitrate Single superphosphate Potassium chloride	Ecoinvent	Nutrient	?	/	?	/	/		No	/	To handle the PM production of 16000 t/yr. produced from an average size pig farm and the available FW amount of 10000 t/yr.	Ireland	Yes	No
3	WOS	Temizel-Sekeryan, S; Wu, F; Hicks, AL	Life Cycle Assessment of Struvite Precipitation from Anaerobically Digested Dairy Manure: A Wisconsin Perspective	ALCA (inex.)	2021	Nutrient recycling from cow manure	1	Struvite precipitation	Bench-scale: The liquid phase from the anaerobic digested dairy cow manure used for the struvite precipitation.	Liquid fraction of digested cow manure	Struvite	As commercial fertilizer (inex.)	?	N P	N fertilizer P fertilizer	UAN (Urea ammonium nitrate) TSP (Triple superphosphate)	Ecoinvent	Nutrient	N: 15.6% P: 58.3%	Amini 2014; Sena 2019; Ostara Nutrient Recovery Technologies Inc. 2019	Single constraining factor	PNA	Internal	Yes	No	/	Dual: 1kg of AD‐L‐dairy manure treated + 1 kg of struvite produced from the anaerobically digested dairy cow manure input.	U.S.	No	/
3		Temizel-Sekeryan, S; Wu, F; Hicks, AL	Life Cycle Assessment of Struvite Precipitation from Anaerobically Digested Dairy Manure: A Wisconsin Perspective	ALCA (inex.)	2021	Nutrient recycling from cow manure	1		Farm-scale	Liquid fraction of digested cow manure	Struvite	As commercial fertilizer (inex.)	?	N P	N fertilizer P fertilizer	UAN (Urea ammonium nitrate) TSP (Triple superphosphate)	Ecoinvent	Nutrient	N: 15.6% P: 58.3%	Amini 2014; Sena 2019; Ostara Nutrient Recovery Technologies Inc. 2019	Single constraining factor	PNA	Internal		No	/	Dual: 1kg of AD‐L‐dairy manure treated + 1 kg of struvite produced from the anaerobically digested dairy cow manure input.	U.S.	No	/
4	WOS	Nordahl, SL; Devkota, JP; Amirebrahimi, J; Smith, SJ; Breunig, HM; Preble, CV; Satchwell, AJ; Jin, L; Brown, NJ; Kirchstetter, TW; Scown, CD	Life-Cycle Greenhouse Gas Emissions and Human Health Trade-Offs of Organic Waste Management Strategies	Life cycle thinking based study	2020	Organic waste management	2	AD + Composting	Composting of raw organic waste or digestate	Food waste	Compost	?	/	N	N fertilizer	Urea	Wang, M. 2008	Nutrient	0.037	Torres-Climent, A. et al., 2015 Sullivan, D.M., et al., 2015	Single constraining factor	PNA	Internal	Yes	No	/	1 wet ton of mixed organic waste processed	U.S.	Yes	No
4		Nordahl, SL; Devkota, JP; Amirebrahimi, J; Smith, SJ; Breunig, HM; Preble, CV; Satchwell, AJ; Jin, L; Brown, NJ; Kirchstetter, TW; Scown, CD	Life-Cycle Greenhouse Gas Emissions and Human Health Trade-Offs of Organic Waste Management Strategies	Life cycle thinking based study	2020	Organic waste management	2	AD	AD of organic waste and the digestate is used for land application.	Food waste	Digestate	?	/	N	N fertilizer	Urea	Wang, M. 2008	Nutrient	0.037	Torres-Climent, A. et al., 2015 Sullivan, D.M., et al., 2015	Single constraining factor	PNA	Internal		No	/	1 wet ton of mixed organic waste processed	U.S.	Yes	No
5	WOS	Bora, RR; Lei, M; Tester, JW; Lehmann, J; You, FQ	Life Cycle Assessment and Technoeconomic Analysis of Thermochemical Conversion Technologies Applied to Poultry Litter with Energy and Nutrient Recovery	?	2020	Waste management + Technology investigation	7	Direct land application	Reference - direct land application	poultry litter	Poultry litter	?	/	N P K	N fertilizer K2O fertilizer P2O5 fertilizer	?	/	Nutrient	?	/	?	/	/	Yes	No	/	The management of 1000 kg of fresh or wet poultry litter with a 25% w/w moisture content (proportion given on a wet basis)	?	Yes	No
5		Bora, RR; Lei, M; Tester, JW; Lehmann, J; You, FQ	Life Cycle Assessment and Technoeconomic Analysis of Thermochemical Conversion Technologies Applied to Poultry Litter with Energy and Nutrient Recovery	?	2020	Waste management + Technology investigation	7	Slow/fast pyrolysis	Slow/ fast pyrolysis of the poultry litter. The product biochar is used in land application to replace fertilizer.	poultry litter	Biochar	?	/	(N: save up by fertilizer improvement effect) P K	N fertilizer K2O fertilizer P2O5 fertilizer	?	/	Nutrient	?	/	Single constraining factor	Improved-effect	Internal		No	/	The management of 1000 kg of fresh or wet poultry litter with a 25% w/w moisture content (proportion given on a wet basis)	?	Yes	N2O saving compared to commercial fertilizer
5		Bora, RR; Lei, M; Tester, JW; Lehmann, J; You, FQ	Life Cycle Assessment and Technoeconomic Analysis of Thermochemical Conversion Technologies Applied to Poultry Litter with Energy and Nutrient Recovery	?	2020	Waste management + Technology investigation	7	Gasification	Gasification of the poultry feedstock. Produced biochar is for the land application.	poultry litter	Biochar	?	/	(N: save up by fertilizer improvement effect) P K	N fertilizer K2O fertilizer P2O5 fertilizer	?	/	Nutrient	?	/	Single constraining factor	Improved-effect	Internal		No	/	The management of 1000 kg of fresh or wet poultry litter with a 25% w/w moisture content (proportion given on a wet basis)	?	Yes	N2O saving compared to commercial fertilizer
5		Bora, RR; Lei, M; Tester, JW; Lehmann, J; You, FQ	Life Cycle Assessment and Technoeconomic Analysis of Thermochemical Conversion Technologies Applied to Poultry Litter with Energy and Nutrient Recovery	?	2020	Waste management + Technology investigation	7	Hydrothermal carbonization (HTC)	HTC - land application of hydrochar and digestate	poultry litter	Hydrochar	?	/	N P K	N fertilizer K2O fertilizer P2O5 fertilizer	?	/	Nutrient	?	/	?	/	/		No	/	The management of 1000 kg of fresh or wet poultry litter with a 25% w/w moisture content (proportion given on a wet basis)	?	Yes	No
5		Bora, RR; Lei, M; Tester, JW; Lehmann, J; You, FQ	Life Cycle Assessment and Technoeconomic Analysis of Thermochemical Conversion Technologies Applied to Poultry Litter with Energy and Nutrient Recovery	?	2020	Waste management + Technology investigation	7	Hydrothermal liquefaction	HTL technology to treat the poultry litter and land application of hydrochar.	poultry litter	Hydrochar	?	/	N P K	N fertilizer K2O fertilizer P2O5 fertilizer	?	/	Nutrient	?	/	?	/	/		No	/	The management of 1000 kg of fresh or wet poultry litter with a 25% w/w moisture content (proportion given on a wet basis)	?	Yes	No
5		Bora, RR; Lei, M; Tester, JW; Lehmann, J; You, FQ	Life Cycle Assessment and Technoeconomic Analysis of Thermochemical Conversion Technologies Applied to Poultry Litter with Energy and Nutrient Recovery	?	2020	Waste management + Technology investigation	7	Supercritical water gasification	SCWG to treat the poultry litter and land application of hydrochar.	poultry litter	Hydrochar	?	/	N P K	N fertilizer K2O fertilizer P2O5 fertilizer	?	/	Nutrient	?	/	?	/	/		No	/	The management of 1000 kg of fresh or wet poultry litter with a 25% w/w moisture content (proportion given on a wet basis)	?	Yes	No
5		Bora, RR; Lei, M; Tester, JW; Lehmann, J; You, FQ	Life Cycle Assessment and Technoeconomic Analysis of Thermochemical Conversion Technologies Applied to Poultry Litter with Energy and Nutrient Recovery	?	2020	Waste management + Technology investigation	7	Hydrothermal treatment + AD	Hydrothermal technologies (HTC/HTL/SCWG) to treat the poultry litter. The aqueous phase from the treatment is further directed to the AD. The digestate is used as fertilizer.	poultry litter	Digestate	?	/	N P K	N fertilizer K2O fertilizer P2O5 fertilizer	?	/	Nutrient	?	/	?	/	/		No	/	The management of 1000 kg of fresh or wet poultry litter with a 25% w/w moisture content (proportion given on a wet basis)	?	Yes	No
6	WOS	Tarpani, RRZ; Alfonsin, C; Hospido, A; Azapagic, A	Life cycle environmental impacts of sewage sludge treatment methods for resource recovery considering ecotoxicity of heavy metals and pharmaceutical and personal care products	?	2020	Technology investigation for sludge treatment	2	AD	AD of the sludge and the digestate is used as fertilizer.	Sludge	Digestate	?	/	N P K	Mineral fertilizer	N-P-K 15-15-15	Ecoinvent	Product	0/50/100 kg fertilizer per 1000 kg DM	Hospido et al., 2015	?	/	/	Yes	Three substitution rate	Yes, more sensitive than composting	The treatment of 1000 kg of thickened sludge on a dry matter basis (sludge dry solids mass)	UK	No	/
6		Tarpani, RRZ; Alfonsin, C; Hospido, A; Azapagic, A	Life cycle environmental impacts of sewage sludge treatment methods for resource recovery considering ecotoxicity of heavy metals and pharmaceutical and personal care products	?	2020	Technology investigation for sludge treatment	2	Composting	Composting of the sludge and the compost is used as fertilizer.	Sludge	Compost	?	/	N P K	Mineral fertilizer	N-P-K 15-15-15	Ecoinvent	Product	0/50/100 kg fertilizer per 1000 kg DM	Hospido et al., 2015	?	/	/		Three substitution rate	Yes, in impact category: Climate change, Fossil depletion, Marine eutrophication. Relative ranking unaffected	The treatment of 1000 kg of thickened sludge on a dry matter basis (sludge dry solids mass)	UK	No	/
7	WOS	van Zelm, R; da Motta, RDS; Lam, WY; Menkveld, W; Broeders, E	Life cycle assessment of side stream removal and recovery of nitrogen from wastewater treatment plants	ALCA	2020	Technology investigation on side stream N removal in WWTP	1	Nijhuis Ammonia Recovery system (AECO-NAR)	recover N rich side stream anaerobic digestate supernatant	Wastewater	Ammonium sulfate	As commercial fertilizer (inex.)	?	N	N fertilizer	Ammonium sulfate (same product)	Ecoinvent	Product	1	/	Single constraining factor	PNA	Internal	Yes	To replace different production instead of market mix dataset	Yes, in human health and ecosystem impacts	The treatment of one kg of total dissolved nitrogen inflow	Netherlands	No	/
8	WOS	Pradel, M; Lippi, M; Daumer, ML; Aissani, L	Environmental performances of production and land application of sludge-based phosphate fertilizer-a life cycle assessment case study	?	2020	Nutrient recycling as alternative to fertilizer	3	BioAcid	Bio acidification of the sludge. The aqueous phase is used as fertilizer. The solid phase to sent to the AD for further digestion.	Sludge	Struvite 65% + Calcium magnesium carbonate 35%	As commercial fertilizer	Bradford-Hartke et al., 2015; Cabeza et al., 2011; Egle et al., 2016; Rahman et al., 2014; Thibodeau et al., 2014; Zapka and Muskolus, 2015	N P	N fertilizer	Ammonium nitrate	Ecoinvent	Nutrient	?	see PNA	Single constraining factor	PNA	Internal	Yes	No	/	The production and land application of 60.3 kg ha−1 of P available for plants in mineral form for an entire crop rotation of rapeseed–wheat–winter barley–pea	France	Yes	Yes
8		Pradel, M; Lippi, M; Daumer, ML; Aissani, L	Environmental performances of production and land application of sludge-based phosphate fertilizer-a life cycle assessment case study	?	2020	Nutrient recycling as alternative to fertilizer	3	Gifhorn	Digestated sludge is further treated through Gifhorn and the final product is used as fertilizer.	Sludge	Struvite	As commercial fertilizer	Bradford-Hartke et al., 2015; Cabeza et al., 2011; Egle et al., 2016; Rahman et al., 2014; Thibodeau et al., 2014; Zapka and Muskolus, 2015	N P	N fertilizer	Ammonium nitrate	Ecoinvent	Nutrient	?	see PNA	Single constraining factor	PNA	Internal		No	/	The production and land application of 60.3 kg ha−1 of P available for plants in mineral form for an entire crop rotation of rapeseed–wheat–winter barley–pea	France	Yes	Yes
8		Pradel, M; Lippi, M; Daumer, ML; Aissani, L	Environmental performances of production and land application of sludge-based phosphate fertilizer-a life cycle assessment case study	?	2020	Nutrient recycling as alternative to fertilizer	3	AD	Sludge is with or without pretreatment. The digestated sludge is used as fertilizer.	Sludge	Digestate	0.5	Pradel, 2017	N P	N fertilizer	Ammonium nitrate	Ecoinvent	Nutrient	?	see PNA	Single constraining factor	PNA	Internal		No	/	The production and land application of 60.3 kg ha−1 of P available for plants in mineral form for an entire crop rotation of rapeseed–wheat–winter barley–pea	France	Yes	Yes
9	WOS	Guven, H; Wang, Z; Eriksson, O	Evaluation of future food waste management alternatives in Istanbul from the life cycle assessment perspective	?	2019	Food waste management	2	Composting	Composting of food waste and the product is used as fertilizer.	Food waste	Compost	?	/	N P	N fertilizer P fertilizer	?	?	Nutrient (inex.)	?	Bernstad and la Cour Jansen (2011)	Single constraining factor	PNA	Internal	Yes	No	/	Treatment of 1 kg of food waste	Turkey	No	/
9		Guven, H; Wang, Z; Eriksson, O	Evaluation of future food waste management alternatives in Istanbul from the life cycle assessment perspective	?	2019	Food waste management	2	AD	AD of food waste and digestate is used as fertilizer.	Food waste	Digestate	N: 70% P: 100%	Bernstad and la Cour Jansen, 2011	N P	N fertilizer P fertilizer	?	?	Nutrient (inex.)	?	Bernstad and la Cour Jansen (2011)	Single constraining factor	PNA	Internal		No	/	Treatment of 1 kg of food waste	Turkey	No	/
10	WOS	Tonini, D; Saveyn, HGM; Huygens, D	Environmental and health co-benefits for advanced phosphorus recovery	CLCA	2019	Nutrient recycling technology and alternatives	8	Ostara Pearl ®	Precipitation with struvite production	Sludge	Struvite	N: as commercial K: as commercial	Ebders et al., 2012; Ehlert and Nelemans, 2015	N P K	N fertilizer K fertilizer	N: urea 24,5% + ammonium nitrate 27% + calcium ammonium nitrate 33% Potassium chloride	Ecoinvent + ELCD	Nutrient	N: 100% K: 100%	see PNA	Single constraining factor	PNA	Internal	Yes	No	/	The production and use on land of 1 kg of bioavailable P in a concentrated P fertilizer (>4% P)	EU	Yes	Yes
10		Tonini, D; Saveyn, HGM; Huygens, D	Environmental and health co-benefits for advanced phosphorus recovery	CLCA	2019	Nutrient recycling technology and alternatives	8	Ash from incineration to land application	Incineration of poultry litter and the ash is used as PK fertilizer.	Poultry litter	Poultry litter ash	N: as commercial K: as commercial	Ebders et al., 2012; Ehlert and Nelemans, 2015	N P K	N fertilizer K fertilizer	N: urea 24,5% + ammonium nitrate 27% + calcium ammonium nitrate 33% Potassium chloride	Ecoinvent + ELCD	Nutrient	N: 100% K: 100%	see PNA	Single constraining factor	PNA	Internal		No	/	The production and use on land of 1 kg of bioavailable P in a concentrated P fertilizer (>4% P)	EU	Yes	Yes
10		Tonini, D; Saveyn, HGM; Huygens, D	Environmental and health co-benefits for advanced phosphorus recovery	CLCA	2019	Nutrient recycling technology and alternatives	8	AshDec	Incineration of sludge and produce rhenaite P fertilizer.	Sludge	AshDec rhenanite-like substance	K: as commercial	Ebders et al., 2012; Ehlert and Nelemans, 2015	P K	K fertilizer	N: urea 24,5% + ammonium nitrate 27% + calcium ammonium nitrate 33% Potassium chloride	Ecoinvent + ELCD	Nutrient	K: 100%	see PNA	Single constraining factor	PNA	Internal		No	/	The production and use on land of 1 kg of bioavailable P in a concentrated P fertilizer (>4% P)	EU	Yes	Yes
10		Tonini, D; Saveyn, HGM; Huygens, D	Environmental and health co-benefits for advanced phosphorus recovery	CLCA	2019	Nutrient recycling technology and alternatives	8	Ecophos	Incineration of sludge and the ash is further acidulated. The final product is phosphoric acid.	Sludge	Phosphoric acid	K: as commercial	Ebders et al., 2012; Ehlert and Nelemans, 2015	N P K	N fertilizer K fertilizer	N: urea 24,5% + ammonium nitrate 27% + calcium ammonium nitrate 33% Potassium chloride	Ecoinvent + ELCD	Nutrient	K: 100%	see PNA	Single constraining factor	PNA	Internal		No	/	The production and use on land of 1 kg of bioavailable P in a concentrated P fertilizer (>4% P)	EU	Yes	Yes
10		Tonini, D; Saveyn, HGM; Huygens, D	Environmental and health co-benefits for advanced phosphorus recovery	CLCA	2019	Nutrient recycling technology and alternatives	8	Industrial integration	Incineration of meat and bone meal. The ash is used as feed in the fertilizer industry to produce and ash is processed SSP-like substance.	Meat and bone meal	Single superphosphate-like material	N: as commercial K: as commercial	Ebders et al., 2012; Ehlert and Nelemans, 2015	N P K	N fertilizer K fertilizer	N: urea 24,5% + ammonium nitrate 27% + calcium ammonium nitrate 33% Potassium chloride	Ecoinvent + ELCD	Nutrient	N: 100% K: 73.0%	see PNA	Single constraining factor	PNA	Internal		No	/	The production and use on land of 1 kg of bioavailable P in a concentrated P fertilizer (>4% P)	EU	Yes	Yes
10		Tonini, D; Saveyn, HGM; Huygens, D	Environmental and health co-benefits for advanced phosphorus recovery	CLCA	2019	Nutrient recycling technology and alternatives	8	Composting + Slow pyrolysis	The pig manure is composted and further treated through the slow pyrolysis process. The final product from the pyrolysis is biochar.	Pig manure	Pyrolysis material	N: 10% K: as commercial	Ebders et al., 2012; Ehlert and Nelemans, 2015	N P K	N fertilizer K fertilizer	N: urea 24,5% + ammonium nitrate 27% + calcium ammonium nitrate 33% Potassium chloride	Ecoinvent + ELCD	Nutrient	N: 100% K: 53.2%	see PNA	Single constraining factor	PNA	Internal		No	/	The production and use on land of 1 kg of bioavailable P in a concentrated P fertilizer (>4% P)	EU	Yes	Yes
10		Tonini, D; Saveyn, HGM; Huygens, D	Environmental and health co-benefits for advanced phosphorus recovery	CLCA	2019	Nutrient recycling technology and alternatives	8	Direct land application	Direct application of the organic waste as organic fertilizer with low P concentration	Poultry litter / Pig manure / meat and bone meal	Poultry litter/dewatered pig manure (liquid phase)/ meat and bone meal	Inorg-N: 80% Org-N: 89% P: 85%/85%/40% K: 73%	Brentrup and Pallière, OECD workshop; Bruun et al., 2006	N P K	N fertilizer P fertilizer K fertilizer	N: urea 24,5% + ammonium nitrate 27% + calcium ammonium nitrate 33% SSP Potassium chloride	Ecoinvent + ELCD	Nutrient	N: 80.1%/93.4%/54.6% P: 28.3%/88.5%/40% K: 69.8%/100%/73%	PNA, PNU, PNR	Aggregated constraining factor	Maintenance substitution principle	Internal + External-Environmental		PND value --> substitution rate	?	The production and use on land of 1 kg of bioavailable P in a concentrated P fertilizer (>4% P)	EU	Yes	Yes
10		Tonini, D; Saveyn, HGM; Huygens, D	Environmental and health co-benefits for advanced phosphorus recovery	CLCA	2019	Nutrient recycling technology and alternatives	8	AD	Digestate of sewage sludge or pig manure is used to replace mineral fertilizer	Sewage sludge / Pig manure	Digestate of sewage sludge/pig manure	Inorg-N: 80% Org-N: 89% P: 46%/85% K: 73%	Brentrup and Pallière, OECD workshop; Bruun et al., 2006	N P K	N fertilizer P fertilizer K fertilizer	N: urea 24,5% + ammonium nitrate 27% + calcium ammonium nitrate 33% SSP Potassium chloride	Ecoinvent + ELCD	Nutrient	N: 54.6%/93.4% P: 46.0%/15.3% K: 73.0%/73.0%	PNA, PNU, PNR	Aggregated constraining factor	Maintenance substitution principle	Internal + External-Environmental		PND value --> substitution rate	?	The production and use on land of 1 kg of bioavailable P in a concentrated P fertilizer (>4% P)	EU	Yes	Yes
11	WOS	Hörtenhuber, Stefan Josef Theurl, Michaela Clarissa Möller, Kurt	Comparison of the environmental performance of different treatment scenarios for the main phosphorus recycling sources	?	2019	Waste management and treatment alternatives	11	Compost	Standard and low-emission technique of composting organic waste.	Household waste	Compost	N: 30% K 100% (inex.)	?; Jeng et al., 2006 (meat and bone meal scenarios)	N P K	(N fertilizer) K fertilizer	Ammonium sulfate Potassium sulfate	Ecoinvent	Nutrient	?	PA	Single constraining factor	PNA	Internal	Yes	Yes, alternative substituted product, Vinasse	Yes, lower credit for all indicators except for ADP	1 kg P	EU (inex.)	Yes	No
11		Hörtenhuber, Stefan Josef Theurl, Michaela Clarissa Möller, Kurt	Comparison of the environmental performance of different treatment scenarios for the main phosphorus recycling sources	?	2019	Waste management and treatment alternatives	11	AD	AD of organic feedstock. The digestate is used as fertilizer.	Household waste / Meat and bone meal	Digestate	N: 80% K 100% (inex.)	?; Jeng et al., 2006 (meat and bone meal scenarios)	N P K	(N fertilizer) K fertilizer	Ammonium sulfate Potassium sulfate	Ecoinvent	Nutrient	?	PA	Single constraining factor	PNA	Internal		Yes, alternative substituted product, Vinasse	Yes, lower credit for all indicators except for ADP	1 kg P	EU (inex.)	Yes	No
11		Hörtenhuber, Stefan Josef Theurl, Michaela Clarissa Möller, Kurt	Comparison of the environmental performance of different treatment scenarios for the main phosphorus recycling sources	?	2019	Waste management and treatment alternatives	11	Incineration + Land application	The feedstock is first sent to incineration and the produced as is used as recycled product.	Sewage sludge / Meat and bone meal	Sludge Ash/ Ash of meat and bone meal	K 100% (inex.)	?; Jeng et al., 2006 (meat and bone meal scenarios)	P K	(N fertilizer) K fertilizer	Ammonium sulfate Potassium sulfate	Ecoinvent	Nutrient	?	PA	Single constraining factor	PNA	Internal		Yes, alternative substituted product, Vinasse	Yes, lower credit for all indicators except for ADP	1 kg P	EU (inex.)	Yes	No
11		Hörtenhuber, Stefan Josef Theurl, Michaela Clarissa Möller, Kurt	Comparison of the environmental performance of different treatment scenarios for the main phosphorus recycling sources	?	2019	Waste management and treatment alternatives	11	Chemical solubilization	Chemical solubilization is to increase the plant P availability.	Wood ash / Ash of the meat and bone meal	Wood ash / Ash of meat and bone meal	K 100% (inex.)	?; Jeng et al., 2006 (meat and bone meal scenarios)	P K	(N fertilizer) K fertilizer	Ammonium sulfate Potassium sulfate	Ecoinvent	Nutrient	?	PA	Single constraining factor	PNA	Internal		Yes, alternative substituted product, Vinasse	Yes, lower credit for all indicators except for ADP	1 kg P	EU (inex.)	Yes	No
11		Hörtenhuber, Stefan Josef Theurl, Michaela Clarissa Möller, Kurt	Comparison of the environmental performance of different treatment scenarios for the main phosphorus recycling sources	?	2019	Waste management and treatment alternatives	11	Meat and bone meal as feed + manure	The meant and bone meal is first used for the livestock as feeding. The excreta is then used as manure to the agricultural land.	Meat and bone meal	Meat and bone meal as manure	N: 80% K 100% (inex.)	?; Jeng et al., 2006 (meat and bone meal scenarios)	(N) P K	(N fertilizer) K fertilizer	Ammonium sulfate Potassium sulfate	Ecoinvent	Nutrient	?	PA	Single constraining factor	PNA	Internal		Yes, alternative substituted product, Vinasse	Yes, lower credit for all indicators except for ADP	1 kg P	EU (inex.)	Yes	No
11		Hörtenhuber, Stefan Josef Theurl, Michaela Clarissa Möller, Kurt	Comparison of the environmental performance of different treatment scenarios for the main phosphorus recycling sources	?	2019	Waste management and treatment alternatives	11	Direct land application	Direct land application	Sewage sludge / Wood ash / Meat and bone meal	Biosolids / Wood ash / Meat and bone meal	N: 60% sludge; 80% meat and bone meal K: 100% (inex.)	?; Jeng et al., 2006 (meat and bone meal scenarios)	(N) P K	(N fertilizer) K fertilizer	Ammonium sulfate Potassium sulfate	Ecoinvent	Nutrient	?	PA	Single constraining factor	PNA	Internal		Yes, alternative substituted product, Vinasse	Yes, lower credit for all indicators except for ADP	1 kg P	EU (inex.)	Yes	No
11		Hörtenhuber, Stefan Josef Theurl, Michaela Clarissa Möller, Kurt	Comparison of the environmental performance of different treatment scenarios for the main phosphorus recycling sources	?	2019	Waste management and treatment alternatives	11	Ash Dec	Incineration and ash treatment and land application	Sewage sludge	Ash - Ash Dec	K 100% (inex.)	?; Jeng et al., 2006 (meat and bone meal scenarios)	P K	(N fertilizer) K fertilizer	Ammonium sulfate Potassium sulfate	Ecoinvent	Nutrient	?	PA	Single constraining factor	PNA	Internal		Yes, alternative substituted product, Vinasse	Yes, lower credit for all indicators except for ADP	1 kg P	EU (inex.)	Yes	No
11		Hörtenhuber, Stefan Josef Theurl, Michaela Clarissa Möller, Kurt	Comparison of the environmental performance of different treatment scenarios for the main phosphorus recycling sources	?	2019	Waste management and treatment alternatives	11	LeachPhos		Sewage sludge	Ash - Leachphos	K 100% (inex.)	?; Jeng et al., 2006 (meat and bone meal scenarios)	P K	(N fertilizer) K fertilizer	Ammonium sulfate Potassium sulfate	Ecoinvent	Nutrient	?	PA	Single constraining factor	PNA	Internal		Yes, alternative substituted product, Vinasse	Yes, lower credit for all indicators except for ADP	1 kg P	EU (inex.)	Yes	No
11		Hörtenhuber, Stefan Josef Theurl, Michaela Clarissa Möller, Kurt	Comparison of the environmental performance of different treatment scenarios for the main phosphorus recycling sources	?	2019	Waste management and treatment alternatives	11	Mephrec	Metallurgical treatment of the sludge.	Sewage sludge	Sludge - Mephrec	K 100% (inex.)	?; Jeng et al., 2006 (meat and bone meal scenarios)	P K	(N fertilizer) K fertilizer	Ammonium sulfate Potassium sulfate	Ecoinvent	Nutrient	?	PA	Single constraining factor	PNA	Internal		Yes, alternative substituted product, Vinasse	Yes, lower credit for all indicators except for ADP	1 kg P	EU (inex.)	Yes	No
11		Hörtenhuber, Stefan Josef Theurl, Michaela Clarissa Möller, Kurt	Comparison of the environmental performance of different treatment scenarios for the main phosphorus recycling sources	?	2019	Waste management and treatment alternatives	11	Air-Prex	Chemical precipitation method of treating the sludge to produce struvite.	Sewage sludge	Sludge - Airprex	N: 85% K: 100% (inex.)	?; Jeng et al., 2006 (meat and bone meal scenarios)	N P K	(N fertilizer) K fertilizer	Ammonium sulfate Potassium sulfate	Ecoinvent	Nutrient	?	PA	Single constraining factor	PNA	Internal		Yes, alternative substituted product, Vinasse	Yes, lower credit for all indicators except for ADP	1 kg P	EU (inex.)	Yes	No
11		Hörtenhuber, Stefan Josef Theurl, Michaela Clarissa Möller, Kurt	Comparison of the environmental performance of different treatment scenarios for the main phosphorus recycling sources	?	2019	Waste management and treatment alternatives	11	Stuttgart sludge leaching		Sewage sludge	Sludge - SSL	N: 85% K: 100% (inex.)	?; Jeng et al., 2006 (meat and bone meal scenarios)	N P K	(N fertilizer) K fertilizer	Ammonium sulfate Potassium sulfate	Ecoinvent	Nutrient	?	PA	Single constraining factor	PNA	Internal		Yes, alternative substituted product, Vinasse	Yes, lower credit for all indicators except for ADP	1 kg P	EU (inex.)	Yes	No
12	WOS	Oliver-Tomas, B; Hitzl, M; Owsianiak, M; Renz, M	Evaluation of hydrothermal carbonization in urban mining for the recovery of phosphorus from the organic fraction of municipal solid waste	ALCA	2019	Technology investigation	1	Hydrothermal carbonization	The process water from the hydrothermal carbonization is further concentrated via reverse osmosis. The product is used to replace conventional fertilizer.	Residual biomass	Process water concentrate	?	?	P	P fertilizer	?	Ecoinvent	?	?	/	?	/	/	Yes	No	/	Hydrothermal carbonization of 1 kg of wet biowaste with 100% content of biogenic carbon of total carbon	Spain	No	/
12		Oliver-Tomas, B; Hitzl, M; Owsianiak, M; Renz, M	Evaluation of hydrothermal carbonization in urban mining for the recovery of phosphorus from the organic fraction of municipal solid waste	ALCA	2019	Technology investigation	1	Precipitation	The sludge will be treated in the HTC process and to produce hydrochar. P extraction is conducted to hydrochar before its utilization as solid fuel. The extracted P-rich product is therefore used as fertilizer.	Residual biomass	P-rich solid	1	Self claimed	P	P fertilizer	?	Ecoinvent	?	?	/	?	/	/		No	/	Hydrothermal carbonization of 1 kg of wet biowaste with 100% content of biogenic carbon of total carbon	Spain	No	/
13	WOS	Malila, R; Lehtoranta, S; Viskari, EL	The role of source separation in nutrient recovery - Comparison of alternative wastewater treatment systems	?	2019	Nutrient recycling from human-excrement	3	AD + Composting	WWTP treatment of the wastewater or greywater. The produced sludge is treated via AD and then composted to produce fertilizer.	Wastewater / Greywater	Compost	Solubility N: 8% P: 40%	N: Salmela and Kymalainen, 2014 P: Finnish farmer support system	N P	Mineral fertilizer	?	?	Nutrient	?	PA	Single constraining factor	PNA	Internal	No	No	/	The amount of nutrients produced by one person per year	Finland	Yes	No
13		Malila, R; Lehtoranta, S; Viskari, EL	The role of source separation in nutrient recovery - Comparison of alternative wastewater treatment systems	?	2019	Nutrient recycling from human-excrement	3	Home composting	The separated feces are home composted for land application.	Feces Peat Wood chips	Compost	Solubility N: 8% P: 40%	N: Salmela and Kymalainen, 2014 P: Finnish farmer support system	N P	Mineral fertilizer	?	?	Nutrient	?	PA	Single constraining factor	PNA	Internal		No	/	The amount of nutrients produced by one person per year	Finland	Yes	No
13		Malila, R; Lehtoranta, S; Viskari, EL	The role of source separation in nutrient recovery - Comparison of alternative wastewater treatment systems	?	2019	Nutrient recycling from human-excrement	3	Land application	The collected urine is used as fertilizer.	Urine	Urine	Solubility N: 100% P: 100%	N: Salmela and Kymalainen, 2014 P: Finnish farmer support system	N P	Mineral fertilizer	?	?	Nutrient	?	PA	Single constraining factor	PNA	Internal		No	/	The amount of nutrients produced by one person per year	Finland	Yes	No
13		Malila, R; Lehtoranta, S; Viskari, EL	The role of source separation in nutrient recovery - Comparison of alternative wastewater treatment systems	?	2019	Nutrient recycling from human-excrement	3	AD	Urine and feces are collected together and treated for fertilizer production.	Blackwater	Digestate	Solubility N: 13% P: 40%	N: Salmela and Kymalainen, 2014 P: Finnish farmer support system	N P	Mineral fertilizer	?	?	Nutrient	?	PA	Single constraining factor	PNA	Internal		No	/	The amount of nutrients produced by one person per year	Finland	Yes	No
14	WOS	Slorach, PC; Jeswani, HK; Cuellar-Franca, R; Azapagic, A	Environmental sustainability of anaerobic digestion of household food waste	ALCA (inex.)	2019	Food waste management via AD	1	AD	Anaerobic digestion of food waste and produce fertilizer.	Food waste	Digestate	40% /18%/65% 100% 100%	N: Nicholson et al., 2016; P+K: Bernstad and la Cour Jansen, 2011; Møller et al., 2009	N P K	N fertilizer P fertilizer K fertilizer	Ammonium nitrate ? ?	Ecoinvent	Nutrient	?	see PNA	Single constraining factor	PNA	Internal	Yes	Alternative substituted product --> urea	Yes, mixed effect on affected impact categories. Terrestrial acidification and particulate matter formation more than 50%.	Dual: Treatment of 1 tons food waste + Generation of 1 MWh electricity	UK	Yes	Yes
15	WOS	Pradel, M; Aissani, L	Environmental impacts of phosphorus recovery from a product Life Cycle Assessment perspective: Allocating burdens of wastewater treatment in the production of sludge-based phosphate fertilizer	?	2019	Sludge-based P-fertilizer investigation	1	AD	The solid fraction from BioAcid process is digested in the AD and the digestate is used as fertilizer or raw sludge.	Biological acidified sludge solid fraction / sludge	Digestate	50% 100%	Valeur de 2009, ESCO MAFOR à partir des données commission européenne	N P	N fertilizer P fertilizer	Ammonium nitrate Triple superphosphate	Ecoinvent	Nutrient	?	OTV, 1997; Gourdet et al., 2016; Rocher et al., 2016	Single constraining factor	PNA	Internal	Yes	/	/	Annual production of 1 kg of P available for plants in mineral form	France	Yes	Yes
16	WOS	ten Hoeve, M; Bruun, S; Jensen, LS; Christensen, TH; Scheutz, C	Life cycle assessment of garden waste management options including long-term emissions after land application	ALCA	2019	Alternative garden waste management	2	Compost	Compost of garden waste with different options of compositions.	Garden waste	Compost	MFE P: 81%	Möller et al. 2018	P	P fertilizer	Triple superphosphate	Ecoinvent	Nutrient	0.265	Phosphorus life cycle inventory (PLCI) model	Aggregated constraining factor	Simulation models	Internal + External-Environmental	Yes	No	/	The treatment of 1000 kg of garden waste generated in Denmark	Denmark	Yes	Yes
16		ten Hoeve, M; Bruun, S; Jensen, LS; Christensen, TH; Scheutz, C	Life cycle assessment of garden waste management options including long-term emissions after land application	ALCA	2019	Alternative garden waste management	2	Land application	Direct utilization of garden waste to the soil with different compositions.	Garden waste	Garden waste	?	/	P	P fertilizer	Triple superphosphate	Ecoinvent	Nutrient	0.265	Phosphorus life cycle inventory (PLCI) model	Aggregated constraining factor	Simulation models	Internal + External-Environmental		No	/	The treatment of 1000 kg of garden waste generated in Denmark	Denmark	Yes	Yes
17	WOS	Shi, YL; Zhou, L; Xu, YY; Zhou, HJ; Shi, L	Life cycle cost and environmental assessment for resource-oriented toilet systems	?	2018	Technology investigation in toilet system	1	Forward osmosis	Yellow water is treated in the FO system and the liquid fertilizer is produced.	Yellow water	Liquid fertilizer	As commercial	?	N P K	N fertilizer P fertilizer K fertilizer	?	?	Nutrient	?	Primary content data	Single constraining factor	PNA	Internal	No	/	/	Collecting and treating the human waste of 780 women and 800 men in one-day toilet use	China	No	/
18	WOS	Vaneeckhaute, C; Styles, D; Prade, T; Adams, P; Thelin, G; Rodhe, L; Gunnarsson, I; D'Hertefeldt, T	Closing nutrient loops through decentralized anaerobic digestion of organic residues in agricultural regions: A multi-dimensional sustainability assessment	CLCA	2018	Nutrient reuse and organic waste management	1	AD	Using AD to process animal manure and organic waste to produce biofertilizer.	Pig slurry / Food waste / Slaughterhouse waste / Grass silage	Residual biofertilizer	MANNER model	/	N P K	N fertilizer P fertilizer K fertilizer	Ammonium nitrate Triple superphosphate Potassium chloride	Ecoinvent	Nutrient	MFE	MANNER NPK model (Nicholson et al., 2013)	Aggregated constraining factor	Simulation models	Internal + External-Environmental	No	No	/	1 Mg dry matter (DM) of residue biofertilizer (recycling based fertilizer)	Sweden	Yes	Yes
19	WOS	Lijo, L; Frison, N; Fatone, F; Gonzalez-Garcia, S; Feijoo, G; Moreira, MT	Environmental and sustainability evaluation of livestock waste management practices in Cyprus	ALCA (inex.)	2018	Livestock waste management	5	Anaerobic lagoon	After the solid-liquid separation process, the liquid phase is further treated in an anaerobic lagoon. The bottom sludge is used as organic fertilizer.	Livestock waste	Sludge	?	/	N P	N fertilizer P fertilizer	?	Ecoinvent	Nutrient	?	/	?	/	/	Yes	No	/	1 t of animal waste treated	Cyprus	Yes	Yes
19		Lijo, L; Frison, N; Fatone, F; Gonzalez-Garcia, S; Feijoo, G; Moreira, MT	Environmental and sustainability evaluation of livestock waste management practices in Cyprus	ALCA (inex.)	2018	Livestock waste management	5	Land application	After the solid-liquid separation process, the solid phase is stored and later is used as organic fertilizer.	Livestock waste	Dewatered livestock waste	?	/	N P	N fertilizer P fertilizer	?	Ecoinvent	Nutrient	?	/	?	/	/		No	/	1 t of animal waste treated	Cyprus	Yes	Yes
19		Lijo, L; Frison, N; Fatone, F; Gonzalez-Garcia, S; Feijoo, G; Moreira, MT	Environmental and sustainability evaluation of livestock waste management practices in Cyprus	ALCA (inex.)	2018	Livestock waste management	5	AD	AD of the animal waste. The digestate is sent to land application.	Livestock waste	Digestate	?	/	N P	N fertilizer P fertilizer	?	Ecoinvent	Nutrient	?	/	?	/	/		No	/	1 t of animal waste treated	Cyprus	Yes	Yes
19		Lijo, L; Frison, N; Fatone, F; Gonzalez-Garcia, S; Feijoo, G; Moreira, MT	Environmental and sustainability evaluation of livestock waste management practices in Cyprus	ALCA (inex.)	2018	Livestock waste management	5	Struvite precipitation	The liquid phase from the AD is used to precipitate Struvite. The rest liquid is also used irrigation water to replace fertilizer.	Livestock waste	Struvite	?	/	N P	N fertilizer P fertilizer	?	Ecoinvent	Nutrient	?	/	?	/	/		No	/	1 t of animal waste treated	Cyprus	Yes	Yes
19		Lijo, L; Frison, N; Fatone, F; Gonzalez-Garcia, S; Feijoo, G; Moreira, MT	Environmental and sustainability evaluation of livestock waste management practices in Cyprus	ALCA (inex.)	2018	Livestock waste management	5	AD + Composting	The livestock waste is first AD and the digestate is further treated via composting.	Livestock waste	Compost	?	/	N P Peat	N fertilizer P fertilizer Peat	?	Ecoinvent	Nutrient	?	/	?	/	/		No	/	1 t of animal waste treated	Cyprus	Yes	Yes
20	WOS	Oldfield, TL; Sikirica, N; Mondini, C; Lopez, G; Kuikman, PJ; Holden, NM	Biochar, compost and biochar-compost blend as options to recover nutrients and sequester carbon	ALCA (inex.)	2018	Nutrient recycling + Carbon Sequestering	3	Compost	Compost of biowaste (Italy & Belgium) / Olive mill waste, sheep manure and olive tree pruning (Spain). The compost is used as fertilizer.	Biowaste (Italy & Belgium) / Olive mill waste, sheep manure and olive tree pruning (Spain)	Compost	N: 5% P: 8% K: 5%	N: field trial P: Kluge, 2003; Sinaj et al., 2002 K: Kluge, 2003	N P K	N fertilizer (P fertilizer) K fertilizer	?	ROU, 2003; Skowronska and Filipek, 2014	Nutrient	N: 8.3% P: 53.3% K: 9.1%	see PNA	Single constraining factor	PNA	Internal	Yes	Avoided fertilizer production and use	No	Dual: 1 kg of crop (i.e. grape for Italy; leek for Belgium; and olive for Spain) + one hectare per year	Italy Spain Belgium	Yes	Yes
20		Oldfield, TL; Sikirica, N; Mondini, C; Lopez, G; Kuikman, PJ; Holden, NM	Biochar, compost and biochar-compost blend as options to recover nutrients and sequester carbon	ALCA (inex.)	2018	Nutrient recycling + Carbon Sequestering	3	Pyrolysis	Using oak residue to produce biochar. The biochar is used to replace mineral fertilizer.	Oak residue	Biochar	N: 0% P: 2% K: 0%	N + K: field and lab trial P: Parvage et al., 2013	P	N fertilizer (P fertilizer) K fertilizer	?	ROU, 2003; Skowronska and Filipek, 2014	Nutrient	P: 13%	see PNA	Single constraining factor	PNA	Internal		Avoided fertilizer production and use	No	Dual: 1 kg of crop (i.e. grape for Italy; leek for Belgium; and olive for Spain) + one hectare per year	Italy Spain Belgium	Yes	Yes
20		Oldfield, TL; Sikirica, N; Mondini, C; Lopez, G; Kuikman, PJ; Holden, NM	Biochar, compost and biochar-compost blend as options to recover nutrients and sequester carbon	ALCA (inex.)	2018	Nutrient recycling + Carbon Sequestering	3	Pyrolysis + Compost	Blending biochar with feedstock before composting or after composting. The produced blend is used as fertilizer.	Biochar and Feedstock	Blend (Compost + Biochar)	Combined above and in ratio 9:1 (biochar: compost in mass)	See above	N P K	N fertilizer (P fertilizer) K fertilizer	?	ROU, 2003; Skowronska and Filipek, 2014	Nutrient	See above	see PNA	Single constraining factor	PNA	Internal		Avoided fertilizer production and use	No	Dual: 1 kg of crop (i.e. grape for Italy; leek for Belgium; and olive for Spain) + one hectare per year	Italy Spain Belgium	Yes	Yes
21	WOS	Pedizzi, C; Noya, I; Sarli, J; Gonzalez-Garcia, S; Lema, JM; Moreira, MT; Carballa, M	Environmental assessment of alternative treatment schemes for energy and nutrient recovery from livestock manure	?	2018	Alternative livestock manures management	4	AD	AD of the input mixture with possible posttreatment. The digestate is used as fertilizer.	52% cow manure, 43% pig manure and 5% segregates	Digestate	?	/	N P	N fertilizer P fertilizer	Ammonium nitrate Phosphorus oxide	Ecoinvent	Nutrient	N: 41% P: 95%	N: De Vries et al., 2011, 2012 P: Dalgaard et al., 2006; De Vries et al., 2011; Rahman et al., 2014	?	/	/	No	No	/	274 ton of manure mixture input per day	Spain	Yes	Yes
21		Pedizzi, C; Noya, I; Sarli, J; Gonzalez-Garcia, S; Lema, JM; Moreira, MT; Carballa, M	Environmental assessment of alternative treatment schemes for energy and nutrient recovery from livestock manure	?	2018	Alternative livestock manures management	4	Struvite precipitation	AD of the input mixture with possible posttreatment. The liquid phase is further treated to recover P. Using ultrafiltration can improve Struvite precipitation.	52% cow manure, 43% pig manure and 5% segregates	Struvite	?	/	N P	N fertilizer P fertilizer	Ammonium nitrate Phosphorus oxide	Ecoinvent	Nutrient	N: 100% P: 95% / 99%	N: Tao et al., 2016 P: Dalgaard et al., 2006; De Vries et al., 2011; Rahman et al., 2014	?	/	/		No	/	274 ton of manure mixture input per day	Spain	Yes	Yes
21		Pedizzi, C; Noya, I; Sarli, J; Gonzalez-Garcia, S; Lema, JM; Moreira, MT; Carballa, M	Environmental assessment of alternative treatment schemes for energy and nutrient recovery from livestock manure	?	2018	Alternative livestock manures management	4	Nitritation-Denitritation	The liquid phase from the AD is further treated in the nitritation-denitritation process. The effluent is then used as irrigation to replace fertilizer.	The liquid phase from AD	Effluent	?	/	N P	N fertilizer P fertilizer	Ammonium nitrate Phosphorus oxide	Ecoinvent	Nutrient	N: 41% P: 95%	N: De Vries et al., 2011, 2012 P: Dalgaard et al., 2006; De Vries et al., 2011; Rahman et al., 2014	?	/	/		No	/	274 ton of manure mixture input per day	Spain	Yes	Yes
21		Pedizzi, C; Noya, I; Sarli, J; Gonzalez-Garcia, S; Lema, JM; Moreira, MT; Carballa, M	Environmental assessment of alternative treatment schemes for energy and nutrient recovery from livestock manure	?	2018	Alternative livestock manures management	4	High rate activated sludge / Partial nitritation anammox	The liquid phase from the AD is further treated in the high rate activated sludge or partial nitritation anammox process. The effluent is then used as irrigation to replace fertilizer.	The liquid phase from AD	Effluent	?	/	N P	N fertilizer P fertilizer	Ammonium nitrate Phosphorus oxide	Ecoinvent	Nutrient	N: 41% P: 95%	N: De Vries et al., 2011, 2012 P: Dalgaard et al., 2006; De Vries et al., 2011; Rahman et al., 2014	?	/	/		No	/	274 ton of manure mixture input per day	Spain	Yes	Yes
22	WOS	Corbala-Robles, L; Sastafiana, WND; Van Linden, V; Volcke, EIP; Schaubroeck, T	Life cycle assessment of biological pig manure treatment versus direct land application - a trade-off story	ALCA (inex.)	2018	Manure management	3	Biological treatment + Lagoon	Thin fraction from centrifugation of the raw manure is sent to biological treatment and lagoon. The effluent is to land field.	Raw manure	Effluent	N: 100% P: 100%	VLM, 2016	N P	N fertilizer P fertilizer	N: 8% urea + 89% calcium ammonium + 3% ammonium sulphate P: Triple superphosphate	Ecoinvent	Nutrient	?	see PNA	Single constraining factor	PNA	Internal	Yes	No	/	1 cubic meter of raw manure	Belgium	Yes	Yes
22		Corbala-Robles, L; Sastafiana, WND; Van Linden, V; Volcke, EIP; Schaubroeck, T	Life cycle assessment of biological pig manure treatment versus direct land application - a trade-off story	ALCA (inex.)	2018	Manure management	3	Compost	The solid fraction from the raw manure is composted. The product is used for land application.	Raw manure	Compost	N: 30% P: 30%	VLM, 2016	N P	N fertilizer P fertilizer	N: 8% urea + 89% calcium ammonium + 3% ammonium sulphate P: Triple superphosphate	Ecoinvent	Nutrient	?	see PNA	Single constraining factor	PNA	Internal		No	/	1 cubic meter of raw manure	Belgium	Yes	Yes
22		Corbala-Robles, L; Sastafiana, WND; Van Linden, V; Volcke, EIP; Schaubroeck, T	Life cycle assessment of biological pig manure treatment versus direct land application - a trade-off story	ALCA (inex.)	2018	Manure management	3	Land application	The raw manure is stored and then transported to the farm land and used as fertilizer.	Raw manure	Manure	N: 60% P: 100%	VLM, 2016	N P	N fertilizer P fertilizer	N: 8% urea + 89% calcium ammonium + 3% ammonium sulphate P: Triple superphosphate	Ecoinvent	Nutrient	?	see PNA	Single constraining factor	PNA	Internal		No	/	1 cubic meter of raw manure	Belgium	Yes	Yes
23	WOS	Amann, A; Zoboli, O; Krampe, J; Rechberger, H; Zessner, M; Egle, L	Environmental impacts of phosphorus recovery from municipal wastewater	ALCA (inex.)	2018	P recovery technologies in WWTPs	18	REM-NUT	P Recovery from liquid phase (digester supernatant/dissolved P in anaerobic sludge/effluent).	Wastewater	CaP	?	/	P	P fertilizer	Global market for phosphate fertilizer, as P2O5	Ecoinvent	Nutrient	?	/ (assumption)	Single constraining factor	PNA	Internal	No	/	/	Dual: The treatment of 1 population equivalent and year + 1 kg of recovered P	Austria	No	No
23		Amann, A; Zoboli, O; Krampe, J; Rechberger, H; Zessner, M; Egle, L	Environmental impacts of phosphorus recovery from municipal wastewater	ALCA (inex.)	2018	P recovery technologies in WWTPs	18	Ostara Pearl		Wastewater	Struvite	?	/	P	P fertilizer	Global market for phosphate fertilizer, as P2O5	Ecoinvent	Nutrient	?	/ (assumption)	Single constraining factor	PNA	Internal		/	/	Dual: The treatment of 1 population equivalent and year + 1 kg of recovered P	Austria	No	No
23		Amann, A; Zoboli, O; Krampe, J; Rechberger, H; Zessner, M; Egle, L	Environmental impacts of phosphorus recovery from municipal wastewater	ALCA (inex.)	2018	P recovery technologies in WWTPs	18	PRISA		Wastewater	Struvite	?	/	P	P fertilizer	Global market for phosphate fertilizer, as P2O5	Ecoinvent	Nutrient	?	/ (assumption)	Single constraining factor	PNA	Internal		/	/	Dual: The treatment of 1 population equivalent and year + 1 kg of recovered P	Austria	No	No
23		Amann, A; Zoboli, O; Krampe, J; Rechberger, H; Zessner, M; Egle, L	Environmental impacts of phosphorus recovery from municipal wastewater	ALCA (inex.)	2018	P recovery technologies in WWTPs	18	P-RoC		Wastewater	CaP	?	/	P	P fertilizer	Global market for phosphate fertilizer, as P2O5	Ecoinvent	Nutrient	?	/ (assumption)	Single constraining factor	PNA	Internal		/	/	Dual: The treatment of 1 population equivalent and year + 1 kg of recovered P	Austria	No	No
23		Amann, A; Zoboli, O; Krampe, J; Rechberger, H; Zessner, M; Egle, L	Environmental impacts of phosphorus recovery from municipal wastewater	ALCA (inex.)	2018	P recovery technologies in WWTPs	18	Air-Prex		Wastewater	Struvite	?	/	P	P fertilizer	Global market for phosphate fertilizer, as P2O5	Ecoinvent	Nutrient	?	/ (assumption)	Single constraining factor	PNA	Internal		/	/	Dual: The treatment of 1 population equivalent and year + 1 kg of recovered P	Austria	No	No
23		Amann, A; Zoboli, O; Krampe, J; Rechberger, H; Zessner, M; Egle, L	Environmental impacts of phosphorus recovery from municipal wastewater	ALCA (inex.)	2018	P recovery technologies in WWTPs	18	DHV Crystallactor		Wastewater	CaP	?	/	P	P fertilizer	Global market for phosphate fertilizer, as P2O5	Ecoinvent	Nutrient	?	/ (assumption)	Single constraining factor	PNA	Internal		/	/	Dual: The treatment of 1 population equivalent and year + 1 kg of recovered P	Austria	No	No
23		Amann, A; Zoboli, O; Krampe, J; Rechberger, H; Zessner, M; Egle, L	Environmental impacts of phosphorus recovery from municipal wastewater	ALCA (inex.)	2018	P recovery technologies in WWTPs	18	Gifhorn	P Recovery from sewage sludge.	Sludge	Struvite	?	/	P	P fertilizer	Global market for phosphate fertilizer, as P2O5	Ecoinvent	Nutrient	?	/ (assumption)	Single constraining factor	PNA	Internal		/	/	Dual: The treatment of 1 population equivalent and year + 1 kg of recovered P	Austria	No	No
23		Amann, A; Zoboli, O; Krampe, J; Rechberger, H; Zessner, M; Egle, L	Environmental impacts of phosphorus recovery from municipal wastewater	ALCA (inex.)	2018	P recovery technologies in WWTPs	18	Stuttgart		Sludge	Struvite	?	/	P	P fertilizer	Global market for phosphate fertilizer, as P2O5	Ecoinvent	Nutrient	?	/ (assumption)	Single constraining factor	PNA	Internal		/	/	Dual: The treatment of 1 population equivalent and year + 1 kg of recovered P	Austria	No	No
23		Amann, A; Zoboli, O; Krampe, J; Rechberger, H; Zessner, M; Egle, L	Environmental impacts of phosphorus recovery from municipal wastewater	ALCA (inex.)	2018	P recovery technologies in WWTPs	18	MEPHREC		Sludge	P-rich slag	?	/	P	P fertilizer	Global market for phosphate fertilizer, as P2O5	Ecoinvent	Nutrient	?	/ (assumption)	Single constraining factor	PNA	Internal		/	/	Dual: The treatment of 1 population equivalent and year + 1 kg of recovered P	Austria	No	No
23		Amann, A; Zoboli, O; Krampe, J; Rechberger, H; Zessner, M; Egle, L	Environmental impacts of phosphorus recovery from municipal wastewater	ALCA (inex.)	2018	P recovery technologies in WWTPs	18	Aqua Reci		Sludge	CaP	?	/	P	P fertilizer	Global market for phosphate fertilizer, as P2O5	Ecoinvent	Nutrient	?	/ (assumption)	Single constraining factor	PNA	Internal		/	/	Dual: The treatment of 1 population equivalent and year + 1 kg of recovered P	Austria	No	No
23		Amann, A; Zoboli, O; Krampe, J; Rechberger, H; Zessner, M; Egle, L	Environmental impacts of phosphorus recovery from municipal wastewater	ALCA (inex.)	2018	P recovery technologies in WWTPs	18	PHOXNAN		Sludge	Struvite	?	/	P	P fertilizer	Global market for phosphate fertilizer, as P2O5	Ecoinvent	Nutrient	?	/ (assumption)	Single constraining factor	PNA	Internal		/	/	Dual: The treatment of 1 population equivalent and year + 1 kg of recovered P	Austria	No	No
23		Amann, A; Zoboli, O; Krampe, J; Rechberger, H; Zessner, M; Egle, L	Environmental impacts of phosphorus recovery from municipal wastewater	ALCA (inex.)	2018	P recovery technologies in WWTPs	18	AshDec	P Recovery from sewage sludge ash.	Sludge ash	Depolluted ash	?	/	P	P fertilizer	Global market for phosphate fertilizer, as P2O5	Ecoinvent	Nutrient	?	/ (assumption)	Single constraining factor	PNA	Internal		/	/	Dual: The treatment of 1 population equivalent and year + 1 kg of recovered P	Austria	No	No
23		Amann, A; Zoboli, O; Krampe, J; Rechberger, H; Zessner, M; Egle, L	Environmental impacts of phosphorus recovery from municipal wastewater	ALCA (inex.)	2018	P recovery technologies in WWTPs	18	LEACHPHOS		Sludge ash	CaP	?	/	P	P fertilizer	Global market for phosphate fertilizer, as P2O5	Ecoinvent	Nutrient	?	/ (assumption)	Single constraining factor	PNA	Internal		/	/	Dual: The treatment of 1 population equivalent and year + 1 kg of recovered P	Austria	No	No
23		Amann, A; Zoboli, O; Krampe, J; Rechberger, H; Zessner, M; Egle, L	Environmental impacts of phosphorus recovery from municipal wastewater	ALCA (inex.)	2018	P recovery technologies in WWTPs	18	PASCH		Sludge ash	CaP	?	/	P	P fertilizer	Global market for phosphate fertilizer, as P2O5	Ecoinvent	Nutrient	?	/ (assumption)	Single constraining factor	PNA	Internal		/	/	Dual: The treatment of 1 population equivalent and year + 1 kg of recovered P	Austria	No	No
23		Amann, A; Zoboli, O; Krampe, J; Rechberger, H; Zessner, M; Egle, L	Environmental impacts of phosphorus recovery from municipal wastewater	ALCA (inex.)	2018	P recovery technologies in WWTPs	18	RecoPhos		Sludge ash	Mineral fertilizer	?	/	P	P fertilizer	Global market for phosphate fertilizer, as P2O5	Ecoinvent	Nutrient	?	/ (assumption)	Single constraining factor	PNA	Internal		/	/	Dual: The treatment of 1 population equivalent and year + 1 kg of recovered P	Austria	No	No
23		Amann, A; Zoboli, O; Krampe, J; Rechberger, H; Zessner, M; Egle, L	Environmental impacts of phosphorus recovery from municipal wastewater	ALCA (inex.)	2018	P recovery technologies in WWTPs	18	Fertilizer Industry		Sludge ash	SSP	?	/	P	P fertilizer	Global market for phosphate fertilizer, as P2O5	Ecoinvent	Nutrient	?	/ (assumption)	Single constraining factor	PNA	Internal		/	/	Dual: The treatment of 1 population equivalent and year + 1 kg of recovered P	Austria	No	No
23		Amann, A; Zoboli, O; Krampe, J; Rechberger, H; Zessner, M; Egle, L	Environmental impacts of phosphorus recovery from municipal wastewater	ALCA (inex.)	2018	P recovery technologies in WWTPs	18	EcoPhos		Sludge ash	Phosphoric acid	?	/	P	Phosphoric acid	Market	Ecoinvent	Nutrient	?	/ (assumption)	Single constraining factor	PNA	Internal		/	/	Dual: The treatment of 1 population equivalent and year + 1 kg of recovered P	Austria	No	No
23		Amann, A; Zoboli, O; Krampe, J; Rechberger, H; Zessner, M; Egle, L	Environmental impacts of phosphorus recovery from municipal wastewater	ALCA (inex.)	2018	P recovery technologies in WWTPs	18	Thermphos		Sludge ash	P4	?	/	P	White elementary P	Market	Ecoinvent	Nutrient	?	/ (assumption)	Single constraining factor	PNA	Internal		/	/	Dual: The treatment of 1 population equivalent and year + 1 kg of recovered P	Austria	No	No
24	WOS	Oldfield, TL; White, E; Holden, NM	The implications of stakeholder perspective for LCA of wasted food and green waste	ALCA (inex.)	2018	Organic waste management	1	Composting	The mixture of food waste and garden waste is used as feedstock for composting. Windrow or in-vessel composting technology is used. The product is used as fertilizer.	Food waste + garden waste	Compost	PNA based on 35% wet weight (Food waste/ garden waste) N: 0.12% / 0.11% P: 0.33% / 0.23% K: 0.89% / 0.85%	WRAP, 2009; Boldrin et el., 2009	(N) P K	Mineral fertilizer	NPK	Hansen et al., 2006; Audsley et al., 1997; UNEP, 2000; FAO, 2001; US EPA, 1999	Nutrient	?	see PNA	Single constraining factor	PNA	Internal	Yes	No	/	Dual: The treatment of 1 kg of organic waste + To produce 1 kg of available nitrogen	Ireland	No	/
25	WOS	Igos, E; Besson, M; Gutierrez, TN; de Faria, ABB; Benetto, E; Barna, L; Ahmadi, A; Sperandio, M	Assessment of environmental impacts and operational costs of the implementation of an innovative source-separated urine treatment	CLCA	2017	Technology investigation	1	Value From Urine (VFU) technology	Urine separation with nutrient recovery (Struvite or Ammonium sulphate). Struvite is first generated from urine. Through a microbial electrolysis cell (MEC), N in the supernatant is recovered then processed to ammonium sulphate.	Urine	Struvite + Ammonium sulphate	?	/	N P	N fertilizer P fertilizer	Monoammonium phosphate + Ammonium sulphate	Ecoinvent	Nutrient	?	/	?	/	/	Yes	No	/	1 m3 of wastewater, of which 10% and 50% of urine volume was treated separately by VFU technology two scenarios, respectively	Netherlands	No	/
26	WOS	Longo, S; Frison, N; Renzi, D; Fatone, F; Hospido, A	Is SCENA a good approach for side-stream integrated treatment from an environmental and economic point of view?	ALCA (inex.)	2017	Technology investigation	2	AD + Compost	AD in conventional WWTP. The digestate is composted and to the land use.	Wastewater	Compost	N: ? P: 0 for chemical precipitated P P: 100% for biological recycled P	Torri et al., 2017; De-Bashan and Bashan, 2004	N P	N fertilizer P fertilizer	N: Ammonium sulphate P: Diammonium phosphate	Ecoinvent	Nutrient	N: 50% P: 100%	N: Foley et al., 2010 (bioavailability) P: PA	Single constraining factor	PNA	Internal	No	No	/	1 kg PO4 3- eq. Removed	Italy	Yes	No
26		Longo, S; Frison, N; Renzi, D; Fatone, F; Hospido, A	Is SCENA a good approach for side-stream integrated treatment from an environmental and economic point of view?	ALCA (inex.)	2017	Technology investigation	2	SCENA (Short-Cut Enhanced Nutrient Abatement) + Composting	Sludge from the WWTP is further processed in the SCENA system, which includes sequencing batch fermentation reactor and short-cut sequencing batch reactor. The solid fraction (biosolids) is then composted.	Wastewater	Compost	N: ? P: 0 for chemical precipitated P P: 100% for biological recycled P	Torri et al., 2017; De-Bashan and Bashan, 2004	N P	N fertilizer P fertilizer	N: Ammonium sulphate P: Diammonium phosphate	Ecoinvent	Nutrient	N: 50% P: 100%	N: Foley et al., 2010 (bioavailability) P: PA	Single constraining factor	PNA	Internal		No	/	1 kg PO4 3- eq. Removed	Italy	Yes	No
27	WOS	Kulak, M; Shah, N; Sawant, N; Unger, N; King, H	Technology choices in scaling up sanitation can significantly affect greenhouse gas emissions and the fertilizer gap in India	?	2017	Nutrient recycling technology investigation	3	WWTP (SBR)	Human waste is treated in the WWTP. Sludge is used for land application.	Human waste	Sludge	N: 50% P: 70%	Remy, 2010; Flisch et al., 2009; Roschke, 2003	N P	N fertilizer P fertilizer	N: 74% for urea + 26% for ammonium nitrate P: Global mix of P fertilizer	Ecoinvent	Nutrient	?	PA	Single constraining factor	PNA	Internal	Yes	No	/	Construct and use a toilet and wastewater treatment infrastructure for an average household of 5.3 people and annual impact of scale of 169 million toilets	India	No	/
27		Kulak, M; Shah, N; Sawant, N; Unger, N; King, H	Technology choices in scaling up sanitation can significantly affect greenhouse gas emissions and the fertilizer gap in India	?	2017	Nutrient recycling technology investigation	3	Twin pit system	Twin pit system with and without toilet source separation is used for treating human waste. Sludge will be composted and then used as fertilizer. Urine is also as fertilizer.	Human waste	Compost	N: 50% P: 70%	Remy, 2010; Flisch et al., 2009; Roschke, 2003	N P	N fertilizer P fertilizer	N: 74% for urea + 26% for ammonium nitrate P: Global mix of P fertilizer	Ecoinvent	Nutrient	?	PA	Single constraining factor	PNA	Internal		No	/	Construct and use a toilet and wastewater treatment infrastructure for an average household of 5.3 people and annual impact of scale of 169 million toilets	India	No	/
27		Kulak, M; Shah, N; Sawant, N; Unger, N; King, H	Technology choices in scaling up sanitation can significantly affect greenhouse gas emissions and the fertilizer gap in India	?	2017	Nutrient recycling technology investigation	3	Twin pit system		Human waste	Urine	N: 100% P: 100%	Remy, 2010; Flisch et al., 2009; Roschke, 2003	N P	N fertilizer P fertilizer	N: 74% for urea + 26% for ammonium nitrate P: Global mix of P fertilizer	Ecoinvent	Nutrient	?	PA	Single constraining factor	PNA	Internal		No	/	Construct and use a toilet and wastewater treatment infrastructure for an average household of 5.3 people and annual impact of scale of 169 million toilets	India	No	/
27		Kulak, M; Shah, N; Sawant, N; Unger, N; King, H	Technology choices in scaling up sanitation can significantly affect greenhouse gas emissions and the fertilizer gap in India	?	2017	Nutrient recycling technology investigation	3	ACoD	With toilet source separation, feces is treated in AD with kitchen waste. Urine is treated as in the twin pit system.	Feces + Kitchen waste	Digestate	N: 50% P: 70%	Remy, 2010; Flisch et al., 2009; Roschke, 2003	N P	N fertilizer P fertilizer	N: 74% for urea + 26% for ammonium nitrate P: Global mix of P fertilizer	Ecoinvent	Nutrient	?	PA	Single constraining factor	PNA	Internal		No	/	Construct and use a toilet and wastewater treatment infrastructure for an average household of 5.3 people and annual impact of scale of 169 million toilets	India	No	/
28	WOS	Kjerstadius, H; Saraiva, AB; Spangberg, J; Davidsson, A	Carbon footprint of urban source separation for nutrient recovery	ALCA	2017	Nutrient recovery alternatives	4	AD	AD of food waste / sewage sludge / blackwater/ greywater. The digestate is returned to agriculture.	Food waste/ WWTP sludge	Digestate	?	/	N P	N fertilizer P fertilizer	N: Ammonium nitrate (N35) P: TSP (P48)	Ecoinvent	Nutrient	?	/	?	/	/	Yes	No	/	The management of 1 capita yearly load of food waste (FW), blackwater (BW) and greywater (GW)	Sweden	Yes	No
28		Kjerstadius, H; Saraiva, AB; Spangberg, J; Davidsson, A	Carbon footprint of urban source separation for nutrient recovery	ALCA	2017	Nutrient recovery alternatives	4	AD + Compost	AD of the sewage sludge. The digestate is further composted. The compost is used as fertilizer.	WWTP sludge	Compost	?	/	N P	N fertilizer P fertilizer	N: Ammonium nitrate (N35) P: TSP (P48)	Ecoinvent	Nutrient	?	/	?	/	/		No	/	The management of 1 capita yearly load of food waste (FW), blackwater (BW) and greywater (GW)	Sweden	Yes	No
28		Kjerstadius, H; Saraiva, AB; Spangberg, J; Davidsson, A	Carbon footprint of urban source separation for nutrient recovery	ALCA	2017	Nutrient recovery alternatives	4	Struvite precipitation	AD of food waste and blackwater. The liquid phase is used to precipitate the P. The final product is struvite.	Food waste/ black water	Struvite	?	/	N P	N fertilizer P fertilizer	N: Ammonium nitrate (N35) P: TSP (P48)	Ecoinvent	Nutrient	?	/	?	/	/		No	/	The management of 1 capita yearly load of food waste (FW), blackwater (BW) and greywater (GW)	Sweden	Yes	No
28		Kjerstadius, H; Saraiva, AB; Spangberg, J; Davidsson, A	Carbon footprint of urban source separation for nutrient recovery	ALCA	2017	Nutrient recovery alternatives	4	Ammonia stripping	AD of food waste and blackwater. The liquid phase is further treated via ammonia stripping. The final product is ammonia stripping.	Food waste/ black water	Ammonium sulphate	?	/	N P	N fertilizer P fertilizer	N: Ammonium nitrate (N35) P: TSP (P48)	Ecoinvent	Nutrient	?	/	?	/	/		No	/	The management of 1 capita yearly load of food waste (FW), blackwater (BW) and greywater (GW)	Sweden	Yes	No
29	WOS	Heimersson, S; Svanstrom, M; Cederberg, C; Peters, G	Improved life cycle modelling of benefits from sewage sludge anaerobic digestion and land application	ALCA	2017	Multifunctionality approaches (substitution/allocation) in sludge reuse	1	AD	The sludge produced in the WWTP is anaerobically digestated. The digestate is then used at arable land to replace mineral fertilizer.	Sludge	Digestate	?	/	N P	N fertilizer P fertilizer	Calcium ammonium nitrate Triple superphosphate	fertilizer Europe (Brentrup, 2015)	Nutrient	N: 50%/30% P: 70%/100%	Bengtsson et al.,1997 / N: Dalemo et al., 1998; P: Linderholm et al., 2012/	Single constraining factor	PNA	Internal	Yes	Substitution rate	Yes: The ratio at which the N in sludge replaces mineral N fertilizer was shown to be important for the overall LCA results.	The treatment and use of 1 dry tons of sludge	Sweden	Yes	No
29		Heimersson, S; Svanstrom, M; Cederberg, C; Peters, G	Improved life cycle modelling of benefits from sewage sludge anaerobic digestion and land application	ALCA	2017	Multifunctionality approaches (substitution/allocation) in sludge reuse	1	AD	The sludge produced in the WWTP is anaerobically digestated. The digestate is then used at arable land to replace mineral fertilizer.	Sludge	Digestate	?	/	N P	N fertilizer P fertilizer	Calcium ammonium nitrate Triple superphosphate	fertilizer Europe (Brentrup, 2015)	Nutrient	N: 50% P: 70%	Bengtsson et al., 1997 + Börjesson et al., 2012					Substitution rate	Yes: The ratio at which the N in sludge replaces mineral N fertilizer was shown to be important for the overall LCA results.	The treatment and use of 1 dry tons of sludge	Sweden	Yes	No
29		Heimersson, S; Svanstrom, M; Cederberg, C; Peters, G	Improved life cycle modelling of benefits from sewage sludge anaerobic digestion and land application	ALCA	2017	Multifunctionality approaches (substitution/allocation) in sludge reuse	1	AD	The sludge produced in the WWTP is anaerobically digestated. The digestate is then used at arable land to replace mineral fertilizer.	Sludge	Digestate	?	/	N P	N fertilizer P fertilizer	Calcium ammonium nitrate Triple superphosphate	fertilizer Europe (Brentrup, 2015)	Nutrient	N: 50% P: 70%	Bengtsson et al., 1997 + Andersson, 2012					Substitution rate	Yes: The ratio at which the N in sludge replaces mineral N fertilizer was shown to be important for the overall LCA results.	The treatment and use of 1 dry tons of sludge	Sweden	Yes	No
30	WOS	Pretel, R; Shoener, BD; Ferrer, J; Guest, JS	Navigating environmental, economic, and technological trade-offs in the design and operation of submerged anaerobic membrane bioreactors (AnMBRs)	?	2015	Technology investigation	1	Submerged anaerobic membrane bioreactor (AnMBR)	Submerged anaerobic membrane bioreactor is used to treat wastewater. The produced sludge is used as fertilizer. The final effluent is nutrient-rich and therefore used for fertigation.	Wastewater	Sludge + effluent	?	/	N P	N fertilizer P fertilizer	Ammonium sulfate Diammonium phosphate	Ecoinvent	Nutrient	N: 50% P: 70%	Assumption	Single constraining factor	PNA	Internal	Yes	No	/	To treat 1 m3 of treated wastewater	Spain	No	/
31	WOS	Ishii, SKL; Boyer, TH	Life cycle comparison of centralized wastewater treatment and urine source separation with struvite precipitation: Focus on urine nutrient management	CLCA (inex.)	2015	Nutrient recovery (urine separation)	1	Struvite precipitation with MgO or with Na3PO4	Two scenarios are developed for struvite precipitation with different chemicals. Magnesium oxide (MgO) is added for maximum P recovery as struvite, while the addition of MgO and sodium phosphate (Na3PO4) for maximum P and N recovery as struvite.	Flush water	Struvite	?	/	N P	N fertilizer P fertilizer	N + P: Monoammonium phosphate	Ecoinvent	?	?	/	?	/	/	Yes	/	/	The conveyance, storage, and nutrient management of 1920 m3 of urine	US	No	/
32	WOS	Bradford-Hartke, Z; Lane, J; Lant, P; Leslie, G	Environmental Benefits and Burdens of Phosphorus Recovery from Municipal Wastewater	?	2015	Nutrient recovery in WWTP	4	Urine separation system	The separately collected and stored urine is for land application to offset the mineral fertilizer.	Urine	Urine	N: 100% P: 100% K: 100%	Ashford, 2009; Kirchmann and Pettersson, 1995; Remy and Jekel, 2008; Lundin, et al., 2000	N P K	N fertilizer P fertilizer K fertilizer	Urea Diammonium phosphate (DAP) Potassium chloride	Ecoinvent	Nutrient	?	see PNA	Single constraining factor	PNA	Internal	Yes	/	/	1 kg of plant available phosphorus able to offset synthetic fertilizer	Australia	Yes	Yes
32		Bradford-Hartke, Z; Lane, J; Lant, P; Leslie, G	Environmental Benefits and Burdens of Phosphorus Recovery from Municipal Wastewater	?	2015	Nutrient recovery in WWTP	4	Biological nutrient removal + Anaerobic lagoon	Centralized WWTP with biological nutrient removal. The anaerobic lagoon is used for stabilization of the biosolids. The biosolids are used to replace fertilizer.	Wastewater	Biosolids	N: 50% P: 70%	O' Connor et al., 2002; Miller and O' Conner, 2009; Lundin, et al., 2000; Peters and Rowley, 2009; Johansson et al., 2008	N P	N fertilizer P fertilizer	Urea Diammonium phosphate (DAP)	Ecoinvent	Nutrient	?	see PNA	Single constraining factor	PNA	Internal		P plant availability	No: Improvement due to higher availability. However, the credits do not offset the burdens.	1 kg of plant available phosphorus able to offset synthetic fertilizer	Australia	Yes	Yes
32		Bradford-Hartke, Z; Lane, J; Lant, P; Leslie, G	Environmental Benefits and Burdens of Phosphorus Recovery from Municipal Wastewater	?	2015	Nutrient recovery in WWTP	4	Chemical dosing	Chemical dosing is considered to enhance the P level. The chemically enriched solids are used in agriculture.	Wastewater	Chemical solids	N: 50% P: 50%	O' Connor et al., 2002; Lundin, et al., 2004	N P	N fertilizer P fertilizer	Urea Diammonium phosphate (DAP)	Ecoinvent	Nutrient	?	see PNA	Single constraining factor	PNA	Internal		P plant availability	No: Improvement due to higher availability. However, the credits do not offset the burdens.	1 kg of plant available phosphorus able to offset synthetic fertilizer	Australia	Yes	Yes
32		Bradford-Hartke, Z; Lane, J; Lant, P; Leslie, G	Environmental Benefits and Burdens of Phosphorus Recovery from Municipal Wastewater	?	2015	Nutrient recovery in WWTP	4	Struvite precipitation	The liquid stream from the biological treatment is used for struvite precipitation.	Liquid from the biological treatment	Struvite	N: 100% P: 100%	Johnston and Richards, 2003; Montag and Pinnekamp, 2007; Ashford 2009	N P	N fertilizer P fertilizer	Urea Diammonium phosphate (DAP)	Ecoinvent	Nutrient	?	see PNA	Single constraining factor	PNA	Internal		/	/	1 kg of plant available phosphorus able to offset synthetic fertilizer	Australia	Yes	Yes
33	WOS	Schaubroeck, T; De Clippeleir, H; Weissenbacher, N; Dewulf, J; Boeckx, P; Vlaeminck, SE; Wett, B	Environmental sustainability of an energy self-sufficient sewage treatment plant: Improvements through DEMON and co-digestion	?	2015	WWTP management + Technology investigation	1	AD + compost	Sludge from WWTP is co-digested with food waste. The digestate is then composted in an external facility and then to the land application.	Sludge	Compost	N: 30% P: 100% C: humus carbon 51%	Remy, 2010 Hermann et al., 2011	N P C	N-P fertilizer + Peat & Straw	N-P: Monoammonium phosphate + Diammonium phosphate (N: Urea + Calcium ammonium nitrate + Ammonium sulphate P: Triple super phosphate) Peat:Straw 1:3	Ecoinvent	Nutrient	?	see PNA	Single constraining factor	PNA	Internal	No	No	/	Tri-FU: Treatment of 1m3 of sewage/ Population Equivalent (PE) / kg PO4 equivalent removed	Austria	Yes	Yes
34	WOS	Miller-Robbie, L; Ulrich, BA; Ramey, DF; Spencer, KS; Herzog, SP; Cath, TY; Stokes, JR; Higgins, CP	Life cycle energy and greenhouse gas assessment of the co-production of biosolids and biochar for land application	?	2015	Pyrolysis technology investigation	1	Direct land application	The sludge from the WWTP is further treated (dewatered) and used in agriculture. The biosolids replace mineral fertilizer.	Sludge	Sludge	0.35	Pacific Northwest Extension, 2007	N	N fertilizer	Urea	Sawyer, et al., 2010; Sylvis Environmental, 2009	Nutrient	?	see PNA	Single constraining factor	PNA	Internal	No	No	/	1 dry metric ton of biosolids generated at the WWTP	US	Yes	Yes
35	WOS	Chiew, YL; Spangberg, J; Baky, A; Hansson, PA; Jonsson, H	Environmental impact of recycling digested food waste as a fertilizer in agriculture-A case study	ALCA (inex.)	2015	Nutrient recycling from food waste	1	AD + Composting	The food waste is digestated to produce biogas. The wet reject from the anaerobic digestion is further composted and the compost is used to replace mineral fertilizer.	Food waste	Compost	N: 17.5% P: ?	Odlare et al., 2000 ?	N P	N fertilizer P fertilizer	Ammonium nitrate Triple superphosphate	Brentrup and Pallière, 2008 (BAT); Davis and Haglund, 1999	Nutrient	?	see PNA	Single constraining factor	PNA	Internal	Yes	/	/	The production, handling and spreading of a fertilizer containing 1 kg plant-available nitrogen and 0.20 kg phosphorus after spreading on arable land	Sweden	Yes	No
36	WOS	Zhao, Y; Deng, WJ	Environmental impacts of different food waste resource technologies and the effects of energy mix	?	2014	Food waste management	2	Composting	The food waste is transported to the composting plant. The compost is used on the farmland.	Food waste	Compost	?	/	N P K	N fertilizer P fertilizer K fertilizer	?	?	?	?	/	?	/	/	Yes	/	/	To treatment the same amount of food waste (3584 t per day in total)	China	Yes	No
36		Zhao, Y; Deng, WJ	Environmental impacts of different food waste resource technologies and the effects of energy mix	?	2014	Food waste management	2	AD + Composting	The food waste treated in the combined digestion and composting facility. The compost is used on the farmland.	Food waste	Compost	?	/	N P K	N fertilizer P fertilizer K fertilizer	?	?	?	?	/	?	/	/		/	/	To treatment the same amount of food waste (3584 t per day in total)	China	Yes	No
37	WOS	Poeschl, M; Ward, S; Owende, P	Environmental impacts of biogas deployment - Part II: life cycle assessment of multiple production and utilization pathways	ALCA	2012	Technology investigation	2	AD/ACoD	Single feedstock or co-digestion. The digestate is then transported and used on the fields.	Cattle manure/ Straw / Corn silage / Grass silage / Whole wheat plant silage / Municipal solid waste / Food residues / Pomace / Slaughterhouse waste (paunch content) / Grease separator sludge	Digestate	N: 45% (cattle manure) / 65% (other feedstocks) P: 100% K: 100%	N: Wendland, 2009; Amon et al., 2002 P: Helm, 2010 K: KTBL, 2009; Amon et., 2007; Wendland, 2009	N P K	N fertilizer P fertilizer K fertilizer	Ammonium nitrate Triple superphosphate Potassium sulfate	?	Nutrient	?	see PNA	Single constraining factor	PNA	Internal	Yes	No	/	The treatment of 1 tons of organic material (feedstock) in small and large-scale biogas plants	Germany	No	/
37		Poeschl, M; Ward, S; Owende, P	Environmental impacts of biogas deployment - Part II: life cycle assessment of multiple production and utilization pathways	ALCA	2012	Technology investigation	2	AD/ACoD + Composting	Single feedstock or co-digestion. The digestate is composted. The compost replaces mineral fertilizer.	Cattle manure/ Straw / Corn silage / Grass silage / Whole wheat plant silage / Municipal solid waste / Food residues / Pomace / Slaughterhouse waste (paunch content) / Grease separator sludge	Compost	N: 45% (cattle manure) / 65% (other feedstocks) P: 100% K: 100%	N: Wendland, 2009; Amon et al., 2002 P: Helm, 2010 K: KTBL, 2009; Amon et., 2007; Wendland, 2009	N P K	N fertilizer P fertilizer K fertilizer	Ammonium nitrate Triple superphosphate Potassium sulfate	?	Nutrient	?	see PNA	Single constraining factor	PNA	Internal		No	/	The treatment of 1 tons of organic material (feedstock) in small and large-scale biogas plants	Germany	No	/
38	WOS	Lederer, J; Rechberger, H	Comparative goal-oriented assessment of conventional and alternative sewage sludge treatment options	?	2010	Technology investigation + Nutrient recycling management	3	Direct land application	Only pretreatment of raw sludge such as sterilization. The sludge is then used in agriculture to replace fertilizer.	Raw sludge	Sludge	Solubility in citric acid N: P: 60%	Heter and Külling, 2001; Adam et al., 2009	N P	N fertilizer P fertilizer	?	?	Nutrient	Nutrient	?	Single constraining factor	PNA	Internal	No	/	/	One ton of raw sludge	EU-15	Yes	No
38		Lederer, J; Rechberger, H	Comparative goal-oriented assessment of conventional and alternative sewage sludge treatment options	?	2010	Technology investigation + Nutrient recycling management	3	Incineration + Land application	Sludge is incinerated. The produced ash is used to substitute mineral fertilizer.	Raw sludge	Ash	P: 50%	Heter and Külling, 2001; Adam et al., 2009	P	P fertilizer	?	?	Nutrient	Nutrient	?	Single constraining factor	PNA	Internal		/	/	One ton of raw sludge	EU-15	Yes	No
38		Lederer, J; Rechberger, H	Comparative goal-oriented assessment of conventional and alternative sewage sludge treatment options	?	2010	Technology investigation + Nutrient recycling management	3	SUSAN technology	The incinerated ash is further processed to recover P in the ash. Due to the treatment, heavy metals are majorly removed from the final product.	Ash	Fertilizer	P:90%	Heter and Külling, 2001; Adam et al., 2009	P	P fertilizer	?	?	Nutrient	Nutrient	?	Single constraining factor	PNA	Internal		/	/	One ton of raw sludge	EU-15	Yes	No
39	WOS	Johansson, K; Perzon, M; Froling, M; Mossakowska, A; Svanstrom, M	Sewage sludge handling with phosphorus utilization - life cycle assessment of four alternatives	ALCA (inex.)	2008	Alternative sludge management	3	AD (mining site)	Use digested sludge for the mining site restoration to avoid the usage of moraine and mineral fertilizer.	Sludge	Sludge	?	/	N P + Moraine	N fertilizer P fertilizer + Moraine	Calcium ammonium nitrate Triple superphosphate + Moraine	TSP based on Western Europe production N Köping plant in Sweden	Nutrient	?	N: Davis and Haglund, 1999 P: Western European production	?	/	/	Yes	The land use emission N2O from the N fertilizer with high and low estimation	Yes. Significance in magnitude with high estimation and in the difference between low and high estimation.	1 tons of dry solids of digested sludge	Sweden	Yes	Yes (Only for mineral fertilizer and only for N-emissions and CH4, which do not apply for the Aqua Reci)
39		Johansson, K; Perzon, M; Froling, M; Mossakowska, A; Svanstrom, M	Sewage sludge handling with phosphorus utilization - life cycle assessment of four alternatives	ALCA (inex.)	2008	Alternative sludge management	3	Composting	The sewage sludge is composted with other materials such as ashes, bark. The compost is used as fertilizer and topsoil for golf courses.	Sludge	Compost	?	/	N P + Topsoil	N fertilizer P fertilizer + Topsoil	Calcium ammonium nitrate Triple superphosphate + Topsoil	TSP based on Western Europe production N Köping plant in Sweden	Nutrient	?	N: Davis and Haglund, 1999 P: Western European production	?	/	/		The land use emission N2O from the N fertilizer with high and low estimation	Yes. Significance in magnitude with high estimation and in the difference between low and high estimation.	1 tons of dry solids of digested sludge	Sweden	Yes	Yes (Only for mineral fertilizer and only for N-emissions and CH4, which do not apply for the Aqua Reci)
39		Johansson, K; Perzon, M; Froling, M; Mossakowska, A; Svanstrom, M	Sewage sludge handling with phosphorus utilization - life cycle assessment of four alternatives	ALCA (inex.)	2008	Alternative sludge management	3	AD (farm)	Direct land application of hygienized digestate to replace the use of mineral fertilizer.	Sludge	Digestate	? P: 70%	Pettersspon, 2001	N P	N fertilizer P fertilizer	Calcium ammonium nitrate Triple superphosphate	TSP based on Western Europe production N Köping plant in Sweden	Nutrient	N: 5.7% (based on input)	N: Davis and Haglund, 1999 P: Western European production	?	/	/		The land use emission N2O from the N fertilizer with high and low estimation	Yes. Significance in magnitude with high estimation and in the difference between low and high estimation.	1 tons of dry solids of digested sludge	Sweden	Yes	Yes (Only for mineral fertilizer and only for N-emissions and CH4, which do not apply for the Aqua Reci)
39		Johansson, K; Perzon, M; Froling, M; Mossakowska, A; Svanstrom, M	Sewage sludge handling with phosphorus utilization - life cycle assessment of four alternatives	ALCA (inex.)	2008	Alternative sludge management	3	Aqua Reci	The sewage sludge is treated in supercritical water to oxidize organic fractions. Phosphorus is extracted from the inorganic residue.	Sludge	Ferric phosphate	0.7	?	P	P fertilizer	Triple superphosphate	TSP based on Western Europe production N Köping plant in Sweden	Nutrient	PNA based	N: Davis and Haglund, 1999 P: Western European production	Single constraining factor	PNA	Internal		/	/	1 tons of dry solids of digested sludge	Sweden	Yes	Yes (Only for mineral fertilizer and only for N-emissions and CH4, which do not apply for the Aqua Reci)
40	WOS	Hospido, A; Moreira, MT; Martin, M; Rigola, M; Feijoo, G	Environmental evaluation of different treatment processes for sludge from urban wastewater treatments: Anaerobic digestion versus thermal processes	?	2005	Alternative sludge management	1	AD	The sludge produced in the WWTP is anaerobically digestated. The digestate is used on the agricultural land	Sludge	Digestate	?	/	N P	N fertilizer P fertilizer	?	IDEMAT database	Nutrient	N: 50% P: 70%	Bengtsson et al., 1997	Single constraining factor	PNA	Internal	Yes	/	/	The management of 1 ton of thickened mixed sludge in dry basis (1 tDM)	Spain	Partial (only heavy metals to the soil)	No
41	WOS	Eriksson, O; Reich, MC; Frostell, B; Bjorklund, A; Assefa, G; Sundqvist, JO; Granath, J; Baky, A; Thyselius, L	Municipal solid waste management from a systems perspective	?	2005	Alternative waste management	2	AD + Composting	The bio-waste is processed in AD with bio gas production. Digestate is further composted and the compost is used to replace fertilizer.	Bio-waste	Compost	?	/	N P	N fertilizer P fertilizer	?	/	?	?	/	?	/	/	Yes	No	/	The treatment of waste produced	Sweden	Yes	No
41		Eriksson, O; Reich, MC; Frostell, B; Bjorklund, A; Assefa, G; Sundqvist, JO; Granath, J; Baky, A; Thyselius, L	Municipal solid waste management from a systems perspective	?	2005	Alternative waste management	2	AD	The bio-waste is processed in AD with bio gas production and the digestate is used for agriculture.	Bio-waste	Digestate	?	/	N P	N fertilizer P fertilizer	?	/	?	?	/	?	/	/		No	/	The treatment of waste produced	Sweden	Yes	No
42	WOS	Lundin, M; Bengtsson, M; Molander, S	Life cycle assessment of wastewater systems: Influence of system boundaries and scale on calculated environmental loads	LCI study (future-oriented, market mix data for electricity)	2000	Alternative wastewater treatment	4	Land application	The sludge produced in the WWTP is stored for 6-12 months and then transported to farms to replace the use of the mineral fertilizer.	Sludge	Sludge	Substitutability N: 50% P: 70%	?	N P	N fertilizer P fertilizer	?	Tillman et al,. 1996	Nutrient	?	?	Aggregated constraining factor	MFE	Internal + External-Environmental	Yes	/	/	The treatment of one yearly person equivalent of sewage (pe*yr.)	Sweden	Yes	No
42		Lundin, M; Bengtsson, M; Molander, S	Life cycle assessment of wastewater systems: Influence of system boundaries and scale on calculated environmental loads	LCI study (future-oriented, market mix data for electricity)	2000	Alternative wastewater treatment	4	Urine separation system	Urine is separated from greywater and feces. After seasonal storage, it is used as liquid fertilizer.	Urine	Urine	Substitutability N: 50% P: 100%	?	N P	N fertilizer P fertilizer	?	Tillman et al,. 1996	Nutrient	?	?	Aggregated constraining factor	MFE	Internal + External-Environmental		/	/	The treatment of one yearly person equivalent of sewage (pe*yr.)	Sweden	Yes	No
42		Lundin, M; Bengtsson, M; Molander, S	Life cycle assessment of wastewater systems: Influence of system boundaries and scale on calculated environmental loads	LCI study (future-oriented, market mix data for electricity)	2000	Alternative wastewater treatment	4	Composting	Composting of black water with kitchen waste and the sludge produced in the septic tank. The compost is used as fertilizer.	Blackwater + kitchen waste + Sludge from septic tank	Compost	Substitutability N: 50% P: 100%	?	N P	N fertilizer P fertilizer	?	Tillman et al,. 1996	Nutrient	?	?	Aggregated constraining factor	MFE	Internal + External-Environmental		/	/	The treatment of one yearly person equivalent of sewage (pe*yr.)	Sweden	Yes	No
42		Lundin, M; Bengtsson, M; Molander, S	Life cycle assessment of wastewater systems: Influence of system boundaries and scale on calculated environmental loads	LCI study (future-oriented, market mix data for electricity)	2000	Alternative wastewater treatment	4	Septic tank	Gray water is treated in septic tank and the filter sand is later used for agriculture.	Greywater	Sand	P: ?	?	P	P fertilizer	?	Tillman et al,. 1996	Nutrient	?	?	Aggregated constraining factor	MFE	Internal + External-Environmental		/	/	The treatment of one yearly person equivalent of sewage (pe*yr.)	Sweden	Yes	No
43	S	Istrate I.-R., Galvez-Martos J.-L., Dufour J.	The impact of incineration phase-out on municipal solid waste landfilling and life cycle environmental performance: Case study of Madrid, Spain	ALCA	2021	Alternative municipal waste management (with incineration phase-out)	1	Composting	Composing t of organic waste or pre-digestated organic waste. The compost is spread on arable land to replace the usage of mineral fertilizers.	Organic waste/ digestate	Compost	MFE N: 30% P: 96.47% (after subtracting P emissions ) K: 100%	Bruun et al., 2006	N P K	N fertilizer P fertilizer K fertilizer	Market for N, P and K fertilizer	Ecoinvent	Nutrient	?	see PNA	Aggregated constraining factor	MFE	Internal + External-Environmental	Yes	No	/	The management of the yearly amount of household, commercial, and street cleaning waste generated in the city of Madrid	Spain	Yes	Yes
44	S	Belhani M., Boutaghane H., Boufas R.-A.	Effect of future environmental laws on the WWTP sustainability in Algeria – case study on phosphorus discharges and sewage sludge management	?	2021	Effect of increased P removal efficiency on the WWTP	1	Land application	WWTP sludge is used direct to land application	Sludge	Sludge	N: 50% P: 50%	Smith, 1996	N P	N fertilizer P fertilizer	?	Gemis	Nutrient	?	see PNA	Single constraining factor	PNA	Internal	Yes	No	/	1 m3 of wastewater for 1 y	Algeria	No	/
45	S	Medina-Martos E., Istrate I.-R., Villamil J.A., Gálvez-Martos J.-L., Dufour J., Mohedano Á.F.	Techno-economic and life cycle assessment of an integrated hydrothermal carbonization system for sewage sludge	ALCA	2020	Technology investigation	1	Hydrothermal carbonization + AD	AD is used to digest the primary sludge and the process liquid from the hydrothermal carbonization, which is used to process secondary sewage sludge. Alternatively, the primary and the secondary sludge from the HTC process is mixed as feed material for the AD. The produced digestate is then used in agriculture to replace fertilizers.	Sewage sludge + Process liquid/sludge from HTC	Digestate	N: 24,5% P: 73,0% K: 100%	Bruun et al., 2016 Yoshida et al., 2018 Bruun et al., 2016	N P K	N fertilizer P fertilizer K fertilizer	Market for N, P and K fertilizer	Ecoinvent	Nutrient	N: 0.298% P: 0.599% K: 0.120%	see PNA	Single constraining factor	PNA	Internal	Yes	No	/	The treatment and disposal of 1000 kg wet mixed sludge	Spain	Yes	Yes
46	S	Tonini D., Wandl A., Meister K., Unceta P.M., Taelman S.E., Sanjuan-Delmás D., Dewulf J., Huygens D.	Quantitative sustainability assessment of household food waste management in the Amsterdam Metropolitan Area	CLCA	2020	Food waste management	4	AD + Composting	Composting of food waste or digestate from food waste, either in domestic composting site (directly used for gardening.) or centralized composting (the compost is used on land).	Food waste / Digestate	Compost	Organic N 55% Mineral N 80% P 85% K 73% (Differentiate the organic and mineral N content)	Eghball et al., 2002; Tonini et al., 2019	N P K Peat	N fertilizer P fertilizer K fertilizer	N: EU average mix for N (urea 24.5%, ammonium nitrate 27%, calcium ammonium nitrate 33%, and urea-ammonium nitrate 15.5%) P: Diammonium phosphate K: Potassium chloride	Ecoinvent	Nutrient	?	see PNA Use behaviour factor: Andersen et al. (2010)	Single constraining factor	PNA + User behavior	Internal	No	No	/	The management of food waste annually generated by the households and small-and-medium-enterprises	The Netherlands	Yes	Yes
46		Tonini D., Wandl A., Meister K., Unceta P.M., Taelman S.E., Sanjuan-Delmás D., Dewulf J., Huygens D.	Quantitative sustainability assessment of household food waste management in the Amsterdam Metropolitan Area	CLCA	2020	Food waste management	4	Pyrolysis	The compost is further treated in the pyrolysis process. The product from this step is the biochar.	Compost	Biochar	Organic N 55% Mineral N 80% P 85% K 73% (Differentiate the organic and mineral N content)	Eghball et al., 2002; Tonini et al., 2019	N P K Peat	N fertilizer P fertilizer K fertilizer	N: EU average mix for N (urea 24.5%, ammonium nitrate 27%, calcium ammonium nitrate 33%, and urea-ammonium nitrate 15.5%) P: Diammonium phosphate K: Potassium chloride	Ecoinvent	Nutrient	?	see PNA Use behaviour factor: Andersen et al. (2010)					No	/	The management of food waste annually generated by the households and small-and-medium-enterprises	The Netherlands	Yes	Yes
46		Tonini D., Wandl A., Meister K., Unceta P.M., Taelman S.E., Sanjuan-Delmás D., Dewulf J., Huygens D.	Quantitative sustainability assessment of household food waste management in the Amsterdam Metropolitan Area	CLCA	2020	Food waste management	4	AD	Digestion of food waste or mechanical-biological treated non-separate collected food waste.	Food waste	Digestate	Organic N 55% Mineral N 80% P 85% K 73% (Differentiate the organic and mineral N content)	Eghball et al., 2002; Tonini et al., 2019	N P K	N fertilizer P fertilizer K fertilizer	N: EU average mix for N (urea 24.5%, ammonium nitrate 27%, calcium ammonium nitrate 33%, and urea-ammonium nitrate 15.5%) P: Diammonium phosphate K: Potassium chloride	Ecoinvent	Nutrient	?	see PNA					No	/	The management of food waste annually generated by the households and small-and-medium-enterprises	The Netherlands	Yes	Yes
46		Tonini D., Wandl A., Meister K., Unceta P.M., Taelman S.E., Sanjuan-Delmás D., Dewulf J., Huygens D.	Quantitative sustainability assessment of household food waste management in the Amsterdam Metropolitan Area	CLCA	2020	Food waste management	4	Ammonium Sulphate stripping	Recovery ammonium sulfonate from the liquid fraction from the AD.	Digestate (liquid)	Ammonium sulphate	Mineral N 80%	Eghball et al., 2002; Tonini et al., 2019	N	N fertilizer P fertilizer K fertilizer	N: EU average mix for N (urea 24.5%, ammonium nitrate 27%, calcium ammonium nitrate 33%, and urea-ammonium nitrate 15.5%) P: Diammonium phosphate K: Potassium chloride	Ecoinvent	Nutrient	?	see PNA					No	/	The management of food waste annually generated by the households and small-and-medium-enterprises	The Netherlands	Yes	Yes
47	S	Lee M., Tsai W.-S., Chen S.-T.	Reusing shell waste as a soil conditioner alternative? A comparative study of eggshell and oyster shell using a life cycle assessment approach	?/CLCA (inex.)	2020	Shell (eggshell and oyster shell) waste management	1	Calcination of shell waste	Conversion eggshells/ oyster shells to CaO that can be used as soil conditioner to replace quicklime	Shell waste	CaO	/	/	Ca	Soil conditioner	Quicklime	Ecoinvent	Product	1	?	Single constraining factor	Equivalent quality	Internal	Yes	/	/	The required dosage of lime (CaO) as a soil conditioner for a land surface of 1 m2 to maintain its soil pH at a neutral level	Taiwan	No	/
48	S	Havukainen J., Väisänen S., Rantala T., Saunila M., Ukko J.	Environmental impacts of manure management based on life cycle assessment approach	?	2020	Horse manure management system	3	Land application	The horse manure with bedding materials are used on agriculture to replace the usage of mineral fertilizers.	Manure	Manure	?	/	N P	N fertilizer P fertilizer	Ammonium nitrate Triple superphosphate	Gabi	?	?	/	?	/	/	No	/	/	1 t of utilized horse feces (stable manure without added bedding material)	Finland	Yes	No
48	S	Havukainen J., Väisänen S., Rantala T., Saunila M., Ukko J.	Environmental impacts of manure management based on life cycle assessment approach	?	2020	Horse manure management system	3	Composting	Composting of stored manure. Three different composting technologies are tested (bag, drum and window). The compost is used on agricultural land.	Manure	Compost	?	/	N P	N fertilizer P fertilizer	Ammonium nitrate Triple superphosphate	Gabi	?	?	/	?	/	/		/	/	1 t of utilized horse feces (stable manure without added bedding material)	Finland	Yes	No
48	S	Havukainen J., Väisänen S., Rantala T., Saunila M., Ukko J.	Environmental impacts of manure management based on life cycle assessment approach	?	2020	Horse manure management system	3	Composting + AD	The horse manure is either directly anaerobically digestated or with the combination of the composting and the AD. The digestate is used on arable land.	Manure/Compost	Digestate	?	/	N P	N fertilizer P fertilizer	Ammonium nitrate Triple superphosphate	Gabi	?	?	/	?	/	/		/	/	1 t of utilized horse feces (stable manure without added bedding material)	Finland	Yes	No
49	S	Fernández-Braña A., Feijoo G., Dias-Ferreira C.	Turning waste management into a carbon neutral activity: Practical demonstration in a medium-sized European city	ALCA	2020	Municipal waste management	1	AD + Composting	The biowaste is firstly anaerobically digestated. The composting stage is followed to biologically stabilize the digestated matter. The final product compost is used on the arable land to replace fertilizers.	Biowaste	Compost	Fertilizer potential N: 20% P: 100% K: 100%	Boldrin et al., 2010	N P K C	N fertilizer P fertilizer K fertilizer + Soil conditioner	? + Peat & straw	Ecoinvent	Nutrient + Product	? + Soil conditioner: 100% (25:75 peat and straw)	Fertilizer: Boldrin et al. 2010 Soil conditioner: Hermann et al. 2011	Single constraining factor	PNA	Internal	No	/	/	Total annual mass of MSW collected within the study area	Portugal	No	/
50	S	Morelli B., Cashman S., Ma X., Turgeon J., Arden S., Garland J.	Environmental and cost benefits of co-digesting food waste at wastewater treatment facilities	?/CLCA (inex.)	2020	Technology investigation with increased scale	1	ACoD	Co-digestion of sewage sludge and source separated organic waste.	Sludge + food waste	Biosolids	MFE N: 55% P: 95%	N: Smith & Durham 2002; Rigby et al. 2016 P: Boldrin et al. 2009	N P	N fertilizer P fertilizer	Urea Single superphosphate	?	Nutrient	?	?	Aggregated constraining factor	MFE	Internal + External-Environmental	Yes	/	/	Treatment of one cubic meter (m3) of municipal wastewater	USA	Yes	Yes (net land application emissions)
51	S	Metson G.S., Feiz R., Quttineh N.-H., Tonderski K.	Optimizing transport to maximize nutrient recycling and green energy recovery	ALCA	2020	Biogas system	2	Land application	Direct land of manure /+ sewage sludge to replace the mineral fertilizer utilization.	Manure +/ Sludge	Manure +/ Sludge	?	/	N P K	N fertilizer P fertilizer K fertilizer	?	N/P: Börjesson et al. 2010 K: Ecoinvent	Nutrient	?	? + Akram et al., 2019b; JBV, 2013	Aggregated constraining factor	PNA+Regulation	Internal + External-Societal	No	/	/	The treatment of all available excreta in Sweden (tons/year)	Sweden	Yes	No
51	S	Metson G.S., Feiz R., Quttineh N.-H., Tonderski K.	Optimizing transport to maximize nutrient recycling and green energy recovery	ALCA	2020	Biogas system	2	AD/ACoD	AD of manure or sewage sludge. Different types of manure and biogas plant are considered. The digestate is used in agricultural land.	Manure +/ Sludge	Digestate	?	/	N P K	N fertilizer P fertilizer K fertilizer	?	N/P: Börjesson et al. 2010 K: Ecoinvent	Nutrient	?	? + Akram et al., 2019b; JBV, 2013	Aggregated constraining factor	PNA+Regulation	Internal + External-Societal		/	/	The treatment of all available excreta in Sweden (tons/year)	Sweden	Yes	No
52	S	Wang Z., Lv J., Gu F., Yang J., Guo J.	Environmental and economic performance of an integrated municipal solid waste treatment: A Chinese case study	?	2020	Integrated municipal solid waste management system	1	AD + Composting	AD of organic municipal solid waste and sewage sludge. The digestate is composted. The final product compost is used to replace fertilizers.	Organic waste + Sludge	Compost	?	/	N P K	N fertilizer P fertilizer K fertilizer	Ammonium nitrate phosphate	Ecoinvent	?	? (per FU, 180kg compost is produced. 4.68 kg, 7.72kg and 2.99kg N, P and K fertilizer are replaced, respectively)	/	?	/	/	Yes	No	/	1 tons of collected MSW processed by the studied system	China	No	/
53	S	Lee E., Oliveira D.S.B.L., Oliveira L.S.B.L., Jimenez E., Kim Y., Wang M., Ergas S.J., Zhang Q.	Comparative environmental and economic life cycle assessment of high solids anaerobic co-digestion for biosolids and organic waste management	?	2020	Alternative waste management	2	HS-AcD (high solid anaerobic co-digestion)	High solid AD to digestion process is used to treat waste mix (food waste, yard waste and sewage sludge). The digestate is to replace the usage of mineral fertilizers.	Waste mix (food waste, yard waste and sewage sludge)	Digestate	?	/	N P K	N fertilizer P fertilizer K fertilizer	?	?	?	?	/	?	/	/	Yes	/	/	To treat 1 tons of wet waste (FW, YW, biosolids mixture)	US	No	/
53		Lee E., Oliveira D.S.B.L., Oliveira L.S.B.L., Jimenez E., Kim Y., Wang M., Ergas S.J., Zhang Q.	Comparative environmental and economic life cycle assessment of high solids anaerobic co-digestion for biosolids and organic waste management	?	2020	Alternative waste management	2	Composting	The waste mix (food waste, yard waste and sewage sludge) is composted in the windrow system. The compost is used to replace both nitrogen-based and non-nitrogen-based fertilizers.	Waste mix (food waste, yard waste and sewage sludge)	Compost	?	/	N P K	N fertilizer P fertilizer K fertilizer	?	?	?	?	/	?	/	/		/	/	To treat 1 tons of wet waste (FW, YW, biosolids mixture)	US	No	/
54	S	Romeiko X.X.	Comprehensive water footprint assessment of conventional and four alternative resource recovery based wastewater service options	WF study	2019	Water system	3	Composting	Urine and feces are separated from the grey water and treated in the composting-toilet. The compost is used as fertilizer.	Urine and feces	Compost	N: 5%-15% (first year) / 2%-8% (following years) P: ?	?	N P	N fertilizer P fertilizer	?	?	?	?	/	?	/	/	Yes	/	/	1 household’s water and wastewater service demand	US	No	/
54		Romeiko X.X.	Comprehensive water footprint assessment of conventional and four alternative resource recovery based wastewater service options	WF study	2019	Water system	3	Land application	The separately collected urine is used as fertilizer.	Urine	Urine	N/P: 95%	Meinzinger and Oldenburg, 2009; Meinzinger et al., 2010	N P	N fertilizer P fertilizer	?	?	?	?	/	?	/	/		/	/	1 household’s water and wastewater service demand	US	No	/
54		Romeiko X.X.	Comprehensive water footprint assessment of conventional and four alternative resource recovery based wastewater service options	WF study	2019	Water system	3	ACoD	Black water from the household is treated separately in the AcD with food waste. The produced digestate is used it replace mineral fertilizers.	Black water	Digestate	N: 78%-0% P: ?	US NREL, 2013	N P	N fertilizer P fertilizer	?	?	?	?	/	?	/	/		/	/	1 household’s water and wastewater service demand	US	No	/
55	S	Sahoo K., Mani S.	Economic and environmental impacts of an integrated-state anaerobic digestion system to produce compressed natural gas from organic wastes and energy crops	ALCA	2019	AD technology investigation	2	Lagoon	The dairy manure is stored in lagoon before its land application. The use of the manure is to replace mineral fertilizers.	Dairy farm slurry	Slurry	N: 70% P: 90% K: 90%	N: Hhamelin et al., 2011 P+K: Ebner et al., 2015	N P K	N fertilizer P fertilizer K fertilizer	?	/	Nutrient	?	?	Single constraining factor	PNA	Internal	Yes	No	/	1 gallon of gasoline equivalent (GGE) biogas produced and consumed as a transportation fuel	US	Yes	No
55		Sahoo K., Mani S.	Economic and environmental impacts of an integrated-state anaerobic digestion system to produce compressed natural gas from organic wastes and energy crops	ALCA	2019	AD technology investigation	2	ACoD	AD of organic waste (dairy farm slurry, food waste). The liquid state from AD is separated and is applied to the crop field to substitute mineral fertilizers.	Slurry + Food waste	Liquid effluent	N: 70% P: 90% K: 90%	N: Hhamelin et al., 2011 P+K: Ebner et al., 2015	N P K	N fertilizer P fertilizer K fertilizer	?	/	Nutrient	?	?	Single constraining factor	PNA	Internal		No	/	1 gallon of gasoline equivalent (GGE) biogas produced and consumed as a transportation fuel	US	Yes	No
55		Sahoo K., Mani S.	Economic and environmental impacts of an integrated-state anaerobic digestion system to produce compressed natural gas from organic wastes and energy crops	ALCA	2019	AD technology investigation	2	ACoD	AD of organic waste (dairy farm slurry, food waste and energy crops). The digestate is used to replace fertilizers.	Slurry + Food waste ( + Energy crops)	Digestate	N: 70% P: 90% K: 90%	N: Hhamelin et al., 2011 P+K: Ebner et al., 2015	N P K	N fertilizer P fertilizer K fertilizer	?	/	Nutrient	?	?	Single constraining factor	PNA	Internal		No	/	1 gallon of gasoline equivalent (GGE) biogas produced and consumed as a transportation fuel	US	Yes	No
56	S	Mohammadi A., Sandberg M., Venkatesh G., Eskandari S., Dalgaard T., Joseph S., Granström K.	Environmental analysis of producing biochar and energy recovery from pulp and paper mill biosludge	?/CLCA	2019	Paper and pulp mill biosludge management	3	Incineration	The paper and pulp mill biosludge is incinerated. The ash is applied to land as fertilizer.	Paper and pulp mill biosludge	Ash	18-35% (the mineral fertilizer 65-70%)	Pitman, 2006	P K Ca Mg	Commercial fertilizer	N: NH4NO3 P: P2O5 K: K2O Mg: MgO Ca: CaCO3	Ecoinvent	Nutrient	P: 4.37% K: 0.53% Ca: 4.67% Mg: 0.88%	see PNA	Single constraining factor	PNA	Internal	Yes	/	/	1 tons of dry matter paper and pulp mill biosludge	Sweden	Yes	No
56		Mohammadi A., Sandberg M., Venkatesh G., Eskandari S., Dalgaard T., Joseph S., Granström K.	Environmental analysis of producing biochar and energy recovery from pulp and paper mill biosludge	?/CLCA	2019	Paper and pulp mill biosludge management	3	Pyrolysis	Pyrolysis is used to process the paper and pulp mill biosludge. The final product from the pyrolysis process is biochar that is used to replace mineral fertilizers.	Paper and pulp mill biosludge	Pyrochar	/	/	N P K Mg Ca	Commercial fertilizer	N: NH4NO3 P: P2O5 K: K2O Mg: MgO Ca: CaCO3	Ecoinvent	Nutrient	The enhanced effect	Mitchell et al. 2015; Sackett et al. 2015	Single constraining factor	Improvement effect	Internal		/	/	1 tons of dry matter paper and pulp mill biosludge	Sweden	Yes	No
56		Mohammadi A., Sandberg M., Venkatesh G., Eskandari S., Dalgaard T., Joseph S., Granström K.	Environmental analysis of producing biochar and energy recovery from pulp and paper mill biosludge	?/CLCA	2019	Paper and pulp mill biosludge management	3	Hydrothermal carbonization (HTC)	Hydrothermal carbonization (HTC) is used. The hydrochar produced from the HTC unit is used as fertilizer.	Paper and pulp mill biosludge	Hydrochar	/	/	N P K Mg Ca	Commercial fertilizer	N: NH4NO3 P: P2O5 K: K2O Mg: MgO Ca: CaCO3	Ecoinvent	Nutrient	The enhanced effect	Mitchell et al. 2015; Sackett et al. 2015	Single constraining factor	Improvement effect	Internal		/	/	1 tons of dry matter paper and pulp mill biosludge	Sweden	Yes	No
57	S	Khandelwal H., Thalla A.K., Kumar S., Kumar R.	Life cycle assessment of municipal solid waste management options for India	?	2019	Municipal solid waste management	2	Composting	Composting of organic waste separated from the municipal solid waste mix. The compost is used in agriculture.	Organic waste	Compost	?	/	?	Compost	?	Ecoinvent	?	?	/	?	/	/	Yes	/	/	The management of one metric ton of municipal solid waste	India	No	/
57		Khandelwal H., Thalla A.K., Kumar S., Kumar R.	Life cycle assessment of municipal solid waste management options for India	?	2019	Municipal solid waste management	2	AD	AD of organic waste separated from the municipal solid waste mix. The digestate is valorized to replace mineral fertilizer.	Organic waste	Digestate	?	/	?	Digestate	?	Ecoinvent	?	?	/	?	/	/		/	/	The management of one metric ton of municipal solid waste	India	No	/
58	S	Di Maria F., Sisani F., Lasagni M., Borges M.S., Gonzales T.H.	Replacement of energy crops with bio-waste in existing anaerobic digestion plants: An energetic and environmental analysis	CLCA	2018	Technology investigation (Alternative feed to AD)	1	Composting	Biowaste is treated in the composting facility. The compost is used to replace fertilizer and to restore the carbon sink of soils.	Organic waste	Compost	?	/	N P K	N fertilizer P fertilizer K fertilizer	Urea P2O5 K2O	Ecoinvent	Nutrient	?	/	?	/	/	No	No	/	The production of 1 kWh of net electrical energy	Italy	Yes	Yes (inex.)
59	S	Khoshnevisan B., Tsapekos P., Alvarado-Morales M., Rafiee S., Tabatabaei M., Angelidaki I.	Life cycle assessment of different strategies for energy and nutrient recovery from source sorted organic fraction of household waste	CLCA	2018	Pretreatment technology investigation for AD	1	AD	AD of source-separated organic household waste. The digestate is used as fertilizer.	Organic waste	Digestate	?	/	N	N fertilizer	Ammonium nitrate	Ecoinvent	?	0.4	Danish regulation	Aggregated constraining factor	Recommendation/Regulation	External-Societal	Yes	Inclusion of P and K substitution. The substituted product is diammonium phosphate and potassium chloride.	No	Pretreating and processing of one tons of organic household waste (on a wet basis)	Denmark	Yes	No
60	S	Owsianiak M., Brooks J., Renz M., Laurent A.	Evaluating climate change mitigation potential of hydrochar: compounding insights from three different indicators	ALCA	2018	Hydrochar use in agriculture	1	HTC	The green waste is processed in HTC plant to produce hydrochar. The HTC process water is nutrient rich and therefore is used to replace fertilizer. The produced hydrochar can improve the fertilizer efficiency and increase the crop yield. The application of hydrochar on agricultural soil results in avoiding the production of crops.	Green waste	HTC process water	?	/	N P K	N fertilizer P fertilizer K fertilizer	?	Ecoinvent	Nutrient	?	/	?	/	/	Yes	/	/	The average application and storage of 1 kg of biogenic HTC carbon to a temperate agricultural soil	Germany + Spain	Yes	No
60		Owsianiak M., Brooks J., Renz M., Laurent A.	Evaluating climate change mitigation potential of hydrochar: compounding insights from three different indicators	ALCA	2018	Hydrochar use in agriculture	1	HTC		Green waste	Hydrocar	/	/	N P K		/	Ecoinvent	?	?	/	?	/	/		Hydrochar fertilizer replacement ability: by using hydrochar on agricultural land, the required N fertilizer is reduced by 50%	Yes, in Marine eutrophication	The average application and storage of 1 kg of biogenic HTC carbon to a temperate agricultural soil	Germany + Spain	Yes	No
61	S	Moretti M., Van Dael M., Malina R., Van Passel S.	Environmental assessment of waste feedstock mono-dimensional and bio-refinery systems: Combining manure co-digestion and municipal waste anaerobic digestion	ALCA (inex.)	2018	Organic waste management	2	AD + Composting	The organic municipal solid waste is treated via AD. The produced digestate is further composted. The compost is used or replace fertilizer.	Organic municipal solid waste	Compost	?	/	N P K	N fertilizer P fertilizer K fertilizer	Calcium ammonium nitrate Single superphosphate Potassium sulfate	Ecoinvent	Nutrient	?	/	?	/	/	Yes	/	/	The total weight of the yearly processed OMSW, manure, and cosubstrates in the local area	Netherlands	No	/
61		Moretti M., Van Dael M., Malina R., Van Passel S.	Environmental assessment of waste feedstock mono-dimensional and bio-refinery systems: Combining manure co-digestion and municipal waste anaerobic digestion	ALCA (inex.)	2018	Organic waste management	2	ACoD	Pig manure is co-digested with the co-substrates. The digestate is further processed through separation, drying, ultrafiltration and reverse osmosis. The final products are dry manure and retentates.	Pig manure	Physically treated digestate	?	/	N P K	N fertilizer P fertilizer K fertilizer	Calcium ammonium nitrate Single superphosphate Potassium sulfate	Ecoinvent	Nutrient	?	/	?	/	/		/	/	The total weight of the yearly processed OMSW, manure, and cosubstrates in the local area	Netherlands	No	/
62	S	Andreasi Bassi S., Christensen T.H., Damgaard A.	Environmental performance of household waste management in Europe - An example of 7 countries	ALCA	2017	Household waste management within the EU	1	AD + Composting	The food waste is composted. The compost can be used either on agricultural land to replace fertilizers or in garden to replace both peat and fertilizer. In German and Italian scenarios, the food waste is sent to AD and the digestate is then composted. The composted digestate is only used on agricultural soil, which is modelled as the direct compost scenario.	Food waste	Compost	?	/	N P K	N fertilizer P fertilizer K fertilizer + Peat	?	?	Nutrient	In agriculture: N: 20% P: 100% K: 100% In garden: 29% Peat: ?	Danish regulation for N User behavior: Andersen et al. 2010	Aggregated constraining factor	Agriculture: regulation Garden: Content + user behavior	Internal + External-Societal	Yes	Scenario analysis of different agricultural soil type + no substitution (composting marginal environmental impacts)	No	The treatment of 1000 kg of household waste	Germany France UK Italy Poland (AD scenario is only for Germany and Italy)	Yes	The avoided heavy metals from commercial fertilizer
63	S	Bernstad Saraiva A., Souza R.G., Valle R.A.B.	Comparative lifecycle assessment of alternatives for waste management in Rio de Janeiro – Investigating the influence of an attributional or consequential approach	ALCA + CLCA	2017	LCA methodology investigation	1	AD	Separately collected organic waste is treated in AD. The digestate is used as fertilizer on farmland.	Organic waste	Digestate	?	/	N P K	N fertilizer P fertilizer K fertilizer / Compost	ALCA: Global average N, P and K fertilizer CLCA: Urea Potassium chloride Simple superphosphate + Compost	Ecoinvent	Nutrient	?	? Compost: Andersen et al. 2010	?	/	/	Yes	Alternative substituted N fertilizer as calcium ammonia nitrate (CAN) + Concentration of cadmium in the replaced P fertilizer	Yes, GWP reduction Eutrophication increasing + No change in hierarchy between scenarios	The collection and treatment of 1 ton of domestic waste	Brazil	Yes	Yes
64	S	Deviatkin I., Havukainen J., Horttanainen M.	Comparative life cycle assessment of thermal residue recycling on a regional scale: A case study of South-East Finland	ALCA (inex.)	2017	Thermal residues recycling and management	1	Land application	Thermal residues from thermal treatment such as incineration are used for forest fertilization and soil neutralization.	Ash	Ash	?	/	P K Ca	P fertilizer K fertilizer + Limestone	Forest fertilizer Rauta-PK (Yara) + Limestone	Gabi	Nutrient	Based on P: 44.52% Ca: 42.19%	P demand for forest: Huotari 2012 Fertilizing effect: Väätäinen et al. 2011 P content in fertilizer: Yara Suomi Oy, 2015 Ca content: Saarsalmi et al., 2011	Single constraining factor	Content + solid demand + duration of fertilizing effect (year)	Internal + External-Environmental	Yes	Substitution rate (break-even substitution rate) + Fertilizer effect + Content of nutrients	Yes: Toxicity related impacts + No + No	The total amount of thermal residues generated in the case study area	Finland	No	/
65	S	Eriksson M., Spångberg J.	Carbon footprint and energy use of food waste management options for fresh fruit and vegetables from supermarkets	ALCA (inex.)	2017	Supermarket waste food management	1	AD	AD of food waste from supermarkets. The digestate is stored for 6 months on manure pad and then used as fertilizer.	Food waste	Digestate	N: 70% P: 100%	Delin et al., 2012	N P	N fertilizer P fertilizer	Ammonium nitrate Triple superphosphate	Ecoinvent	Nutrient	?	Delin et al., 2012	Single constraining factor	PNA	Internal	Yes	/	/	Dual: 1 kg of wasted food in a waste management scenario + The removal of 1 kg of food waste from a supermarket	Sweden	Yes	Yes, N2O emission
66	S	Edwards J., Othman M., Crossin E., Burn S.	Anaerobic co-digestion of municipal food waste and sewage sludge: A comparative life cycle assessment in the context of a waste service provision	ALCA	2017	Waste management system	1	AD	AD for sewage sludge. The digestate is used for land application to replace the use of fertilizer.	Sewage	Digestate	40% 100% 100%	Sharma and Campbell, 2007	N P K	N fertilizer P fertilizer K fertilizer	?	Ecoinvent (assumed)	Nutrient	?	Sharma and Campbell, 2007	Single constraining factor	PNA	Internal	Yes	Yes (assuming no credit for replacing fertilizer)	No	The management of the annual quantity of municipal waste discarded into the mobile garbage bin and collected by the local government, as well as the management of the annual quantity of sewage sludge treated by the local WWTP	Australia	Yes	Yes (assuming N emission for digestate and mineral fertilizer should be the same. It is also investigated in the sensitivity analysis.)
66		Edwards J., Othman M., Crossin E., Burn S.	Anaerobic co-digestion of municipal food waste and sewage sludge: A comparative life cycle assessment in the context of a waste service provision	ALCA	2017	Waste management system	1	ACoD	Co-digestion of food waste and sewage sludge. The digestate is used for land application to replace the use of fertilizer.	Sewage + Food waste	Digestate	40% 100% 100%	Sharma and Campbell, 2007	N P K	N fertilizer P fertilizer K fertilizer	?	Ecoinvent (assumed)	Nutrient	?	Sharma and Campbell, 2007	Single constraining factor	PNA	Internal		Yes (assuming no credit for replacing fertilizer)	No	The management of the annual quantity of municipal waste discarded into the mobile garbage bin and collected by the local government, as well as the management of the annual quantity of sewage sludge treated by the local WWTP	Australia	Yes	Yes (assuming N emission for digestate and mineral fertilizer should be the same. It is also investigated in the sensitivity analysis.)
67	S	Miller-Robbie L., Ramaswami A., Amerasinghe P.	Wastewater treatment and reuse in urban agriculture: Exploring the food, energy, water, and health nexus in Hyderabad, India	Life cycle GHG accounting	2017	WWTP (sewage)	1	WWTP (aerobic treatment)	Treated wastewater is partially reused in agriculture. The nutrient contained treated wastewater is used for irrigation and avoids the use of fertilizer.	Wastewater	Treated water	Solubility of N, P, K measured	Primary	N P K	?	?	?	Nutrient	?	?	Aggregated constraining factor	Simulation models + User behavior + Recommendation/Regulation	Internal + External-Environmental-Societal	No	No	/	Per liter for the combination of wastewater treatment and reuse in agriculture	India	Yes	No
68	S	Negro V., Ruggeri B., Fino D., Tonini D.	Life cycle assessment of orange peel waste management	CLCA	2017	Orange peels waste management	2	AD	AD of orange peel waste combined the D-limonene extraction technology. The digestate is used to replace fertilizer.	Orange peel	Digestate	/	/	N P K	N fertilizer P fertilizer K fertilizer	Calcium ammonium nitrate Diammonium phosphate Potassium chloride	Ecoinvent	Nutrient	?	/	Single constraining factor	Content-based	Internal	Yes	Yes Nitrogen quantity necessary to substitute fertilizer regarding GWP	No	The management of 1 t of orange peel waste (wet weight)	Italy	Yes	Yes
68		Negro V., Ruggeri B., Fino D., Tonini D.	Life cycle assessment of orange peel waste management	CLCA	2017	Orange peels waste management	2	ACoD	AD of orange peel waste with cow manure or with seaweed or with both. The digestate is used as fertilizer.	Orange peel + Manure (+ seaweed)	Digestate	/	/	N P K	N fertilizer P fertilizer K fertilizer	Calcium ammonium nitrate Diammonium phosphate Potassium chloride	Ecoinvent	Nutrient	?	/	Single constraining factor	Content-based	Internal		Yes Nitrogen quantity necessary to substitute fertilizer regarding GWP	No	The management of 1 t of orange peel waste (wet weight)	Italy	Yes	Yes
68		Negro V., Ruggeri B., Fino D., Tonini D.	Life cycle assessment of orange peel waste management	CLCA	2017	Orange peels waste management	2	Composting	Direct composting of orange peel waste with bio-filter. The compost is used to replace the consumption of mineral fertilizer.	Orange peel	Compost	/	/	N P K	N fertilizer P fertilizer K fertilizer	Calcium ammonium nitrate Diammonium phosphate Potassium chloride	Ecoinvent	Nutrient	?	/	Single constraining factor	Content-based	Internal		Yes Nitrogen quantity necessary to substitute fertilizer regarding GWP	No	The management of 1 t of orange peel waste (wet weight)	Italy	Yes	Yes
69	S	Nayal F.S., Mammadov A., Ciliz N.	Environmental assessment of energy generation from agricultural and farm waste through anaerobic digestion	?	2016	WtE from agricultural and farm waste	1	ACoD	AD of grass, vegetable waste, slaughterhouse waste, poultry manure and cattle manure. The digestate is used as fertilizer.	grass, vegetable waste, slaughterhouse waste, poultry manure and cattle manure	Digestate	/	/	N	N fertilizer	Ammonium nitrate	Gabi	Nutrient	?	/	?	/	/	No	No	/	Providing 8599 GJ of electricity to 865 houses, each with four family members, for one year, through the use of 10680 ton/year local agricultural and animal waste	Turkey	Yes	Yes
70	S	Jensen M.B., Møller J., Scheutz C.	Comparison of the organic waste management systems in the Danish-German border region using life cycle assessment (LCA)	CLCA	2016	Organic household waste management	1	AD+ Composting	AD of the waste and the digestate is sent to the composting facilities	Organic household waste	Compost	?	Danish legislation	N P	N fertilizer P fertilizer	?	?	Nutrient	?	Danish regulation for N and P	Aggregated constraining factor	Recommendation/Regulation	External-Societal	No	No	/	1 tons of organic household waste in either the Danish or in the German region	German-Danish border region	Yes (DAISY MODEL)	No
71	S	Blanco D., Collado S., Laca A., Díaz M.	Life cycle assessment of introducing an anaerobic digester in a municipal wastewater treatment plant in Spain	?	2016	Technology investigation (AD in WWTP)	1	AD	AD is integrated in the WWTP to treat the sewage sludge. The produced digestate is used on agricultural land.	Sludge	Digestate	?	/	N P	N fertilizer P fertilizer	?	?	Nutrient	0.3	Bengtsson et al. 1997	Single constraining factor	PNA	Internal	No	No	/	To treat the biodegradable organic load with 60 g of 5-day biochemical oxygen demand per day	Spain	No	/
72	S	Tomei M.C., Bertanza G., Canato M., Heimersson S., Laera G., Svanström M.	Techno-economic and environmental assessment of upgrading alternatives for sludge stabilization in municipal wastewater treatment plants	?	2016	Technology investigation (AD)	1	AD	AD of sewage sludge. The digestate is used for land application.	Sludge	Digestate	?	/	N P	N fertilizer P fertilizer	?	Modelled based on David & Haglund (1999)	Nutrient	40% 70%	Lundin et al. (2004) Bengtsson et al. (1997) Dalemo et al. (1998)	Single constraining factor	PNA	Internal	Yes	No	/	The treatment to the required level of the wastewater and sludge during one day for a plant of the capacity 70,000 PE	Italy	Yes	No
73	S	Parkes O., Lettieri P., Bogle I.D.L.	Life cycle assessment of integrated waste management systems for alternative legacy scenarios of the London Olympic Park	ALCA	2015	Municipal solid waste treatment management	2	AD	AD of the source-separated organic fraction. The digestate is used for land application to replace the use of commercial fertilizer.	Organic waste	Digestate	?	Møller et al. (2009)	N P K	Commercial fertilizer	?	GWP from Williams et al., 2006 Other impact assessment results from Ecoinvent	Nutrient	N: 40% P: 100% K: 100%	Danish regulation (Møller et al. (2009) , secondary reference)	Single constraining factor	Recommendation/Regulation	External-Societal	Yes	No	/	The treatment of the total amount of MSW potentially generated at the Queen Elizabeth Olympic Park in one year of legacy period	UK	Yes	No
73		Parkes O., Lettieri P., Bogle I.D.L.	Life cycle assessment of integrated waste management systems for alternative legacy scenarios of the London Olympic Park	ALCA	2015	Municipal solid waste treatment management	2	Composting	Composting of the source-separated organic fraction. The compost is used as fertilizer.	Organic waste	Compost	?	/	N P K	Commercial fertilizer	?	GWP from Williams et al., 2006 Other impact assessment results from Ecoinvent	Nutrient	0,75% 0,35% 0,95%	Boldrin et al., 2009	?	/	/		No	/	The treatment of the total amount of MSW potentially generated at the Queen Elizabeth Olympic Park in one year of legacy period	UK	Yes	No
74	S	Sørensen B.L., Dall O.L., Habib K.	Environmental and resource implications of phosphorus recovery from waste activated sludge	CLCA	2014	P recycling from sludge	1	Gasification + Extraction	The dried sludge is thermally treated the gasification plant. The ash from gasification is used to extract phosphorus. The final product is diammonium phosphate.	Sludge	Diammonium phosphate	/	/	P	Commercial fertilizer	Diammonium phosphate	Ecoinvent	Product	?	/	Single constraining factor	Equivalent quality	Internal	Yes	Yes Different type of the substitute - Super single phosphate	No for overall results. GWP increasing about 20%.	1 ton of dry waste (1 ton Dry Matter) activated sludge	Denmark	No	No (Toxicity impact caused between scenarios is similar)
75	S	Niero M., Pizzol M., Bruun H.G., Thomsen M.	Comparative life cycle assessment of wastewater treatment in Denmark including sensitivity and uncertainty analysis	CLCA	2014	WWTP types and technologies investigation	2	Aerobic digestion	Aerobic stabilization of sludge from the WWTP followed by the agricultural use of the treated sludge	Sludge	Digestate	1	Assumption	N P	Commercial fertilizer	Diammonium phosphate	Nemecek and Kägi (2007)	Nutrient	?	Assumption	Single constraining factor	PNA	Internal	Yes	No	/	The treatment of 1 m3 of inlet wastewater	Denmark	Yes	Yes (the heavy metal emissions)
75		Niero M., Pizzol M., Bruun H.G., Thomsen M.	Comparative life cycle assessment of wastewater treatment in Denmark including sensitivity and uncertainty analysis	CLCA	2014	WWTP types and technologies investigation	2	AD	AD of sludge and land application of digestate (investigated in the sensitivity analysis)	Sludge	Digestate	1	Assumption	N P	Commercial fertilizer	Diammonium phosphate	Nemecek and Kägi (2007)	Nutrient	?	Assumption	Single constraining factor	PNA	Internal		No	/	The treatment of 1 m3 of inlet wastewater	Denmark	Yes	Yes (the heavy metal emissions)
76	S	Vadenbo C., Guillén-Gosálbez G., Saner D., Hellweg S.	Multi-objective optimization of waste and resource management in industrial networks - Part II: Model application to the treatment of sewage sludge	ALCA (inex.)	2014	Sludge management	1	Incineration + hydro-chemical process	The dewatered sewage sludge is dried and incinerated in the mono/incineration facility. Phosphorus is recovered from the ash.	Sludge	Fertilizer	As mineral fertilizer	Assumption	P	Commercial fertilizer	Single superphosphate	Ecoinvent	Nutrient	?	Assumption	Single constraining factor	PNA	Internal	Yes	No	/	The treatment of 100000 tons sewage sludge along with other system-wide required functionality	Switzerland	No	No
77	S	Brockmann D., Hanhoun M., Négri O., Hélias A.	Environmental assessment of nutrient recycling from biological pig slurry treatment - Impact of fertilizer substitution and field emissions	ALCA (inex.)	2014	Nutrient recycling from pig slurry investigation	2	Composting	Composting of centrifuged pig slurry (solid phase)	Pig slurry	Compost	MFE N: 20,9% P: 75% K: 100%	N: first year PA model calculation (National Manuel of Good Practice for Biosolids) P: sludge + supernatant (Arvalis, 2013) compost (data sheet of the product) K: assumption	N P K	Commercial fertilizer	Average fertilizer mixes	Ecoinvent	Nutrient	?	N: Delin et al. 2012 P+K: Arvalis, 2013	Aggregated constraining factor	MFE	Internal + External-Environmental	Yes	Substitution rate for N (3 methods in total)	Yes (based on the graphic of the result) in impact categories: Ozone depletion Marine eutrophication Freshwater toxicity Marine ecotoxicity Natural land transformation Metal/ Fossil depletion	The treatment of 1 m3 pig slurry	France	Yes	Yes
77		Brockmann D., Hanhoun M., Négri O., Hélias A.	Environmental assessment of nutrient recycling from biological pig slurry treatment - Impact of fertilizer substitution and field emissions	ALCA (inex.)	2014	Nutrient recycling from pig slurry investigation	2	Aerobic biological treatment	Aerobic biological treatment of the liquid phase of the pig slurry. The sludge is used for land application.	Pig slurry	Sludge	N: 41,5% P: 95% K: 100%	N: first year PA model calculation (National Manuel of Good Practice for Biosolids) P: sludge + supernatant (Arvalis, 2013) compost (data sheet of the product) K: assumption	N P K	Commercial fertilizer	Average fertilizer mixes	Ecoinvent	Nutrient	?	N: Delin et al. 2012 P+K: Arvalis, 2013	Aggregated constraining factor	MFE	Internal + External-Environmental		Substitution rate for N (3 methods in total)	Yes (based on the graphic of the result) in impact categories: Ozone depletion Marine eutrophication Freshwater toxicity Marine ecotoxicity Natural land transformation Metal/ Fossil depletion	The treatment of 1 m3 pig slurry	France	Yes	Yes
77		Brockmann D., Hanhoun M., Négri O., Hélias A.	Environmental assessment of nutrient recycling from biological pig slurry treatment - Impact of fertilizer substitution and field emissions	ALCA (inex.)	2014	Nutrient recycling from pig slurry investigation	2	Aerobic biological treatment	Aerobic biological treatment of the liquid phase of the pig slurry. The supernatant is used for land application	Pig slurry	Supernatant	N: 49,0% P: 95% K: 100%	N: first year PA model calculation (National Manuel of Good Practice for Biosolids) P: sludge + supernatant (Arvalis, 2013) compost (data sheet of the product) K: assumption	N P K	Commercial fertilizer	Average fertilizer mixes	Ecoinvent	Nutrient	?	N: Delin et al. 2012 P+K: Arvalis, 2013	Aggregated constraining factor	MFE	Internal + External-Environmental		Substitution rate for N (3 methods in total)	Yes (based on the graphic of the result) in impact categories: Ozone depletion Marine eutrophication Freshwater toxicity Marine ecotoxicity Natural land transformation Metal/ Fossil depletion	The treatment of 1 m3 pig slurry	France	Yes	Yes
78	S	Thibodeau C., Monette F., Glaus M.	Comparison of development scenarios of a black water source-separation sanitation system using life cycle assessment and environmental life cycle costing	?	2014	Technology investigation + wastewater management	4	AD	AD of the sludge produced in the WWTP. The digestate is applied to the farmland.	Sludge	Digestate	N: 50% P: 70% K: 100%	Remy, 2010	N P K	Commercial fertilizer	?	Ecoinvent	Nutrient	?	see PNA	Single constraining factor	PNA	Internal	Yes	No	/	The wastewater and organic kitchen refuse collection and treatment with by-product (digestate/sludge and biogas) recycling for one inhabitant for one year	Canada	Yes (Ammonia emissions depends on spreading methods and the product type. )	Yes
78		Thibodeau C., Monette F., Glaus M.	Comparison of development scenarios of a black water source-separation sanitation system using life cycle assessment and environmental life cycle costing	?	2014	Technology investigation + wastewater management	4	AD	AD of organic kitchen refuse. The digestate is applied to the farmland.	Kitchen refuse	Digestate	N: 50% P: 100% K: 100%	Remy, 2010	N P K	Commercial fertilizer	?	Ecoinvent	Nutrient	?	see PNA	Single constraining factor	PNA	Internal		No	/	The wastewater and organic kitchen refuse collection and treatment with by-product (digestate/sludge and biogas) recycling for one inhabitant for one year	Canada	Yes (Ammonia emissions depends on spreading methods and the product type. )	Yes
78		Thibodeau C., Monette F., Glaus M.	Comparison of development scenarios of a black water source-separation sanitation system using life cycle assessment and environmental life cycle costing	?	2014	Technology investigation + wastewater management	4	ACoD	AD of organic kitchen refuse with blackwater. The digestate is applied to the farmland.	Kitchen refuse + blackwater	Digestate	N: 90% P: 100% K: 100%	Remy, 2010	N P K	Commercial fertilizer	?	Ecoinvent	Nutrient	?	see PNA	Single constraining factor	PNA	Internal		No	/	The wastewater and organic kitchen refuse collection and treatment with by-product (digestate/sludge and biogas) recycling for one inhabitant for one year	Canada	Yes (Ammonia emissions depends on spreading methods and the product type. )	Yes
78		Thibodeau C., Monette F., Glaus M.	Comparison of development scenarios of a black water source-separation sanitation system using life cycle assessment and environmental life cycle costing	?	2014	Technology investigation + wastewater management	4	ACoD	The supernatant from the Co-AD which is used to digestate blackwater with kitchen refuse, is further applied as subsurface irrigation for willow.	Kitchen refuse + blackwater	Supernatant	N: 90% P: 100% K: 100%	Remy, 2010	N P K	Commercial fertilizer	?	Ecoinvent	Nutrient	?	see PNA	Single constraining factor	PNA	Internal		No	/	The wastewater and organic kitchen refuse collection and treatment with by-product (digestate/sludge and biogas) recycling for one inhabitant for one year	Canada	Yes (Ammonia emissions depends on spreading methods and the product type. )	Yes
78		Thibodeau C., Monette F., Glaus M.	Comparison of development scenarios of a black water source-separation sanitation system using life cycle assessment and environmental life cycle costing	?	2014	Technology investigation + wastewater management	4	Wetland	The greywater is treated in the constructed wetland and the effluent is used for willow irrigation.	Greywater	Effluent form the wetland	N: 50% P: 100% K: 100%	Remy, 2010	N P K	Commercial fertilizer	?	Ecoinvent	Nutrient	?	see PNA	Single constraining factor	PNA	Internal		No	/	The wastewater and organic kitchen refuse collection and treatment with by-product (digestate/sludge and biogas) recycling for one inhabitant for one year	Canada	Yes (Ammonia emissions depends on spreading methods and the product type. )	Yes
78		Thibodeau C., Monette F., Glaus M.	Comparison of development scenarios of a black water source-separation sanitation system using life cycle assessment and environmental life cycle costing	?	2014	Technology investigation + wastewater management	4	Struvite precipitation	The supernatant from the Co-AD is further processed to recovery phosphorus.	Supernatant from ACoD	Struvite	N: 100% P: 100% K: 100%	Antonini et al., 2012 Remy, 2010	N P K	Commercial fertilizer	?	Ecoinvent	Nutrient	?	see PNA	Single constraining factor	PNA	Internal		No	/	The wastewater and organic kitchen refuse collection and treatment with by-product (digestate/sludge and biogas) recycling for one inhabitant for one year	Canada	Yes (Ammonia emissions depends on spreading methods and the product type. )	Yes
78		Thibodeau C., Monette F., Glaus M.	Comparison of development scenarios of a black water source-separation sanitation system using life cycle assessment and environmental life cycle costing	?	2014	Technology investigation + wastewater management	4	Acidification + Reverse osmosis	The digestate from co-digestion is filtered. The supernatant from the filtration is firstly acidified. The acidified liquid is then send to the reverse osmosis. The acidified concentrate is transported to farmland to replace commercial fertilizer usage.	Supernatant from ACoD	Acid concentrate	N: 90% P: 100% K: 100%	Antonini et al., 2012 Remy, 2010	N P K	Commercial fertilizer	?	Ecoinvent	Nutrient	?	see PNA	Single constraining factor	PNA	Internal		No	/	The wastewater and organic kitchen refuse collection and treatment with by-product (digestate/sludge and biogas) recycling for one inhabitant for one year	Canada	Yes (Ammonia emissions depends on spreading methods and the product type. )	Yes
79	S	Hamelin L., Naroznova I., Wenzel H.	Environmental consequences of different carbon alternatives for increased manure-based biogas	CLCA	2014	Technology investigation (Co-substrate alternatives investigation for biogas production from manure)	4	ACoD	AD of pig manure and other co-substrate alternatives and the output is used as fertilizer to the farmland.	Pig manure and co-subtract alternative	Digestate	Fertilizer efficiency N: 75% P: 31%-70% K: 32%-87%	Danish legislation	N P K	Commercial fertilizer	Calcium ammonium nitrate Diammonium phosphate Potassium chloride	Ecoinvent	Nutrient	?	Danish legislation	Single constraining factor	PNA + Crop nutrient demand	Internal	Yes	/	/	The management of 1 tons of freshly excreted pig manure	Denmark	Yes	No
79		Hamelin L., Naroznova I., Wenzel H.	Environmental consequences of different carbon alternatives for increased manure-based biogas	CLCA	2014	Technology investigation (Co-substrate alternatives investigation for biogas production from manure)	4	AD	AD of pig manure and the digestate is used on farmland.	Pig manure	Digestate	N: 75% P: 50% K: 56%	Danish legislation	N P K	Commercial fertilizer	Calcium ammonium nitrate Diammonium phosphate Potassium chloride	Ecoinvent	Nutrient	?	Danish legislation	Single constraining factor	PNA + Crop nutrient demand	Internal		/	/	The management of 1 tons of freshly excreted pig manure	Denmark	Yes	No
79		Hamelin L., Naroznova I., Wenzel H.	Environmental consequences of different carbon alternatives for increased manure-based biogas	CLCA	2014	Technology investigation (Co-substrate alternatives investigation for biogas production from manure)	4	Source-separation + direct land application	The pig manure is separated to solid and liquid fraction. The liquid fraction is used on field.	Pig manure	Liquid fraction	N: 65% P: 100% K: 41%	Danish legislation	N P K	Commercial fertilizer	Calcium ammonium nitrate Diammonium phosphate Potassium chloride	Ecoinvent	Nutrient	?	Danish legislation	Single constraining factor	PNA + Crop nutrient demand	Internal		/	/	The management of 1 tons of freshly excreted pig manure	Denmark	Yes	No
79		Hamelin L., Naroznova I., Wenzel H.	Environmental consequences of different carbon alternatives for increased manure-based biogas	CLCA	2014	Technology investigation (Co-substrate alternatives investigation for biogas production from manure)	4	Direct land application	Raw manure is spread on filed to replace mineral fertilizers.	Pig manure	Pig manure	N: 75% P: 50% K: 55%	Danish legislation	N P K	Commercial fertilizer	Calcium ammonium nitrate Diammonium phosphate Potassium chloride	Ecoinvent	Nutrient	?	Danish legislation	Single constraining factor	PNA + Crop nutrient demand	Internal		/	/	The management of 1 tons of freshly excreted pig manure	Denmark	Yes	No
79		Hamelin L., Naroznova I., Wenzel H.	Environmental consequences of different carbon alternatives for increased manure-based biogas	CLCA	2014	Technology investigation (Co-substrate alternatives investigation for biogas production from manure)	4	Composting	Composting of garden waste. The compost is used as fertilizer.	Garden waste	Compost	N: 40% P: 27% K: 22%	Danish legislation	N P K	Commercial fertilizer	Calcium ammonium nitrate Diammonium phosphate Potassium chloride	Ecoinvent	Nutrient	?	Danish legislation	Single constraining factor	PNA + Crop nutrient demand	Internal		/	/	The management of 1 tons of freshly excreted pig manure	Denmark	Yes	No
80	S	Luo Y., Stichnothe H., Schuchardt F., Li G., Huaitalla R.M., Xu W.	Life cycle assessment of manure management and nutrient recycling from a Chinese pig farm	?	2014	Manure management system	3	Composting	Composting of pig manure with pre-digestated pig manure and sawdust / pig manure with corn stalks. The compost is used on cropland.	Pig feces + digestate + sawdust / Pig feces + corn stalks	Compost	MFE N: 50% P: 100% K: 100% Mg:100%	N: Springer, 2011 The rest: assumption	N P K Mg	Commercial fertilizer	?	?	Nutrient	?	see PNA	Aggregated constraining factor	MFE	Internal + External-Environmental	No	/	/	The annual production of a typical pig farm in Beijing area	China	No	/
80		Luo Y., Stichnothe H., Schuchardt F., Li G., Huaitalla R.M., Xu W.	Life cycle assessment of manure management and nutrient recycling from a Chinese pig farm	?	2014	Manure management system	3	AD/ACoD	AD of pig manure or with poultry manure. The effluent from AD is used for irrigation.	Pig slurry +poultry manure / wastewater (liquid from pig stable)	Digestate	N: 100% P: 100% K: 100% Mg:100%	Assumption	N P K Mg	Commercial fertilizer	?	?	Nutrient	?	see PNA	Aggregated constraining factor	MFE	Internal + External-Environmental		/	/	The annual production of a typical pig farm in Beijing area	China	No	/
80		Luo Y., Stichnothe H., Schuchardt F., Li G., Huaitalla R.M., Xu W.	Life cycle assessment of manure management and nutrient recycling from a Chinese pig farm	?	2014	Manure management system	3	Lagoon	The effluent from the AD is treated in a covered lagoon or aerated lagoon. The effluent is used for land application.	Effluent from AD	Effluent	N: 100% P: 100% K: 100% Mg:100%	Assumption	N P K Mg	Commercial fertilizer	?	?	Nutrient	?	see PNA	Aggregated constraining factor	MFE	Internal + External-Environmental		/	/	The annual production of a typical pig farm in Beijing area	China	No	/
81	S	Menikpura S.N.M., Sang-Arun J., Bengtsson M.	Integrated Solid Waste Management: An approach for enhancing climate co-benefits through resource recovery	life cycle GHG accounting	2013	Integrated solid waste management system	1	Composting	Composting of the organic waste. The produced compost is used to replace conventional fertilizer.	Organic waste	Compost	/	/	N P K	Commercial fertilizer	?	Patyk, 1996	?	N: 0,71% P: 0,41% K: 0,54%	Patyk, 1996 (not accessible)	?	/	/	No	/	/	The management of one tons of collected waste in Muangklang Municipality	Thailand	No	/
82	S	Tonini D., Martinez-Sanchez V., Astrup T.F.	Material resources, energy, and nutrient recovery from waste: Are waste refineries the solution for the future?	CLCA	2013	Municipal solid waste management alternatives	1	AD + Composting	AD of (pre-segregated) organic waste and the digestate is stabilized via composting. The compost is used on land to replace mineral fertilizers.	Organic waste	Compost	N: 20% P: 100% K: 100%	N: Danish regulation P+K: Hansen et al., 2009	N P K	Commercial fertilizer	Calcium ammonium nitrate Diammonium phosphate Potassium chloride	?	Nutrient	?	see PNA	Single constraining factor	PNA	Internal	Yes	No	/	The treatment of 1 Mg (wet weight) of municipal solid waste	Europe	Yes	Yes
83	S	De Vries J.W., Groenestein C.M., De Boer I.J.M.	Environmental consequences of processing manure to produce mineral fertilizer and bio-energy	CLCA	2012	Manure management system	3	Dissolved air floatation	The liquid manure is processed in the dissolved air floatation system to The sludge produced is further dewatered and the solid fraction is used for land application.	Pig or cattle manure	Solid fraction	MFE N: 31% (grassland);31% ,41% (pig, cattle, arable land) P: 100% K: 100%	De Vries et al., 2011; DR, 2009.	N P K	Commercial fertilizer	ammonium nitrate Triple superphosphate Potassium chloride	Ecoinvent	Nutrient	?	see PA	Aggregated constraining factor	MFE	Internal + External-Environmental	Yes	No	/	To process 1 ton liquid manure into a mineral concentrate that can be applied as mineral N and K fertilizer and a solid fraction suitable for bio-energy production or application as P fertilizer	Netherlands	Yes	Yes (N-emissions) (P emissions are not included because they are assumed to be the same for all the scenarios.)
83		De Vries J.W., Groenestein C.M., De Boer I.J.M.	Environmental consequences of processing manure to produce mineral fertilizer and bio-energy	CLCA	2012	Manure management system	3	Dissolved air floatation + AD	After the floatation and dewatering, the solid fraction is used as substrate in the AD. The digestate is used to replace mineral fertilizer.	Pig or cattle manure	Digestate	N: 62% , 45% (pig, cattle, grassland) P: 100% K: 100%	De Vries et al., 2011; DR, 2009.	N P K	Commercial fertilizer	ammonium nitrate Triple superphosphate Potassium chloride	Ecoinvent	Nutrient	?	see PA	Aggregated constraining factor	MFE	Internal + External-Environmental		No	/	To process 1 ton liquid manure into a mineral concentrate that can be applied as mineral N and K fertilizer and a solid fraction suitable for bio-energy production or application as P fertilizer	Netherlands	Yes	Yes (N-emissions) (P emissions are not included because they are assumed to be the same for all the scenarios.)
83		De Vries J.W., Groenestein C.M., De Boer I.J.M.	Environmental consequences of processing manure to produce mineral fertilizer and bio-energy	CLCA	2012	Manure management system	3	Reverse osmosis	The effluent from the floatation is sent to the reverse osmosis. The product from it, mineral concentrate, is used on field.	Pig or cattle manure	Mineral concentrate	N: 60% (grassland); 60, 80% (pig, cattle, arable land) P: 100% K: 100%	De Vries et al., 2011; DR, 2009.	N P K	Commercial fertilizer	ammonium nitrate Triple superphosphate Potassium chloride	Ecoinvent	Nutrient	?	see PA	Aggregated constraining factor	MFE	Internal + External-Environmental		Yes The substitution rate of N	Yes. Marine eutrophication 14% Climate change 39/265% Fossil fuel depletion 10-147%	To process 1 ton liquid manure into a mineral concentrate that can be applied as mineral N and K fertilizer and a solid fraction suitable for bio-energy production or application as P fertilizer	Netherlands	Yes	Yes (N-emissions) (P emissions are not included because they are assumed to be the same for all the scenarios.)
84	S	Hermann B.G., Debeer L., De Wilde B., Blok K., Patel M.K.	To compost or not to compost: Carbon and energy footprints of biodegradable materials' waste treatment	ALCA (inex.)	2011	Biodegradable waste management alternatives	2	Home composting	Home composting of the organic waste mix. The compost is used to replace the utilization of peat and N fertilizer.	Organic waste mix (chemical and mechanical pulp for paper and cellulose production, starch, polylactic acid (PLA), starch/ MaterBiTM), polycaprolactone (starch/PCL, polybutyrate-adipate EcoflexTM terephthalate (PBAT, and polyhydroxyalkanoates (PHA))	Compost	N: 100%	The PA is set to 100% as it was not relevant for the default scenario and the nitrogen credits too small.	N peat + straw	Peat N-fertilizer	/ weighted average of (urea, ammonium nitrate, calcium ammonium nitrate and ammonium sulphate)	? IFA, 2008 + Ramirez CA and Worrell E, 2008	Nutrient	79% PA based	Fuchs JG, Schleiss K, 2006 /	Single constraining factor	PNA	Internal	Yes	Yes 1. Replacing straw instead of peat in home composting and AD in the consequential manner, where the replaced straw is used for energy production. + 2. Adding the substitution for P and K.	Yes, Carbon credits increased + No	1 kg of waste material mix	/	Yes	From peat/ straw: only the easily degradable non/renewable carbon emission
84		Hermann B.G., Debeer L., De Wilde B., Blok K., Patel M.K.	To compost or not to compost: Carbon and energy footprints of biodegradable materials' waste treatment	ALCA (inex.)	2011	Biodegradable waste management alternatives	2	Industrial composting	Industrial composting of the organic waste mix. The industrial compost is used to replace peat and straw at a ratio of 1:3. The avoided N mineral fertilizer is also considered.	Organic waste mix (chemical and mechanical pulp for paper and cellulose production, starch, polylactic acid (PLA), starch/ MaterBiTM), polycaprolactone (starch/PCL, polybutyrate-adipate EcoflexTM terephthalate (PBAT, and polyhydroxyalkanoates (PHA))	Compost	N: 100%	The PA is set to 100% as it was not relevant for the default scenario and the nitrogen credits too small.	N peat + straw	Peat+Straw N-fertilizer	/ weighted average of (urea, ammonium nitrate, calcium ammonium nitrate and ammonium sulphate)	? IFA, 2008 + Ramirez CA and Worrell E, 2008	Nutrient	79% + 73% PA based	Fuchs JG, Schleiss K, 2006 /	Single constraining factor	PNA	Internal		Yes 1. Replacing straw instead of peat in home composting and AD in the consequential manner, where the replaced straw is used for energy production. + 2. Adding the substitution for P and K.	Yes, Carbon credits increased + No	1 kg of waste material mix	/	Yes	From peat/ straw: only the easily degradable non/renewable carbon emission
84		Hermann B.G., Debeer L., De Wilde B., Blok K., Patel M.K.	To compost or not to compost: Carbon and energy footprints of biodegradable materials' waste treatment	ALCA (inex.)	2011	Biodegradable waste management alternatives	2	AD	AD of the organic waste mix. The digestate is used to replace the utilization of peat and N fertilizer.	Organic waste mix (chemical and mechanical pulp for paper and cellulose production, starch, polylactic acid (PLA), starch/ MaterBiTM), polycaprolactone (starch/PCL, polybutyrate-adipate EcoflexTM terephthalate (PBAT, and polyhydroxyalkanoates (PHA))	Digestate	N: 100%	The PA is set to 100% as it was not relevant for the default scenario and the nitrogen credits too small.	N peat + straw	Peat N-fertilizer	/ weighted average of (urea, ammonium nitrate, calcium ammonium nitrate and ammonium sulphate)	? IFA, 2008 + Ramirez CA and Worrell E, 2008	Nutrient	68% PA based	Fuchs JG, Schleiss K, 2006 /	Single constraining factor	PNA	Internal		Yes 1. Replacing straw instead of peat in home composting and AD in the consequential manner, where the replaced straw is used for energy production. + 2. Adding the substitution for P and K.	Yes, Carbon credits increased + No	1 kg of waste material mix	/	Yes	From peat/ straw: only the easily degradable non/renewable carbon emission
85	S	Hospido A., Carballa M., Moreira M., Omil F., Lema J.M., Feijoo G.	Environmental assessment of anaerobically digested sludge reuse in agriculture: Potential impacts of emerging micropollutants	?	2010	Digestate management	1	AD	AD of primary and secondary sludge collected from the WWTP. The digestate is then applied on the agricultural land to replace mineral fertilizer.	Sludge	Digestate	/	/	N P	N-fertilizer P-fertilizer	?	Ecoinvent	Nutrient	70% 50%	Bengtsson et al., 1997	Single constraining factor	PNA	Internal	Yes	/	/	the management (anaerobic digestion and disposal) of 10 l of a mixture of primary and secondary sludge collected from the two thickeners	Spain	Yes	No
86	S	Boldrin A., Hartling K.R., Laugen M., Christensen T.H.	Environmental inventory modelling of the use of compost and peat in growth media preparation	CLCA	2010	Organic waste management	1	Composting	Composting of kitchen waste / garden waste to produce soil amendment to replace peat and fertilizers.	Kitchen waste / garden waste	Compost	N: 20% P: 100% K: 100%	?	N P K peat	N-fertilizer P-fertilizer K-fertilizer Peat	? Peat	Hansen et al. (2006) Self-modeled	Nutrient	? volumetric 100%	? Mathur and Voisin, 1996	Single constraining factor	PNA	Internal	Yes	Yes, peat/ compost substitution rate	Yes in: Global warming Nutrient enrichment Acidification	Treatment of 1 Mg of green waste and produce growth media (inexplicitly)	Denmark	Yes	No
87	S	Lundin M., Olofsson M., Pettersson G.J., Zetterlund H.	Environmental and economic assessment of sewage sludge handling options	ALCA (inex.)	2004	Sewage sludge management	3	Direct land application	Direct land application of pasteurized sludge that is produced in the WWTP.	Sludge	Sludge	N: 40% P: 70%	Bengtsson et al., 1997; Dalemo et al., 1998	N P	N-fertilizer P-fertilizer	Ammonium nitrate Triple superphosphate	Davis and Haglund, 1999	Nutrient	?	see PNA	Single constraining factor	PNA	Internal	No	/	/	The handling of 1 metric tons of sludge in dry matter	Sweden	Yes	No
87		Lundin M., Olofsson M., Pettersson G.J., Zetterlund H.	Environmental and economic assessment of sewage sludge handling options	ALCA (inex.)	2004	Sewage sludge management	3	Bio-Con	The dewatered sludge is incinerated. The ash and slag is further treated in a set of ion exchangers where phosphate is recovered.	Sludge	Phosphoric acid	N: 40% P: 70%	Bengtsson et al., 1997; Dalemo et al., 1998	N P	N-fertilizer P-fertilizer	Ammonium nitrate Triple superphosphate	Davis and Haglund, 1999	Nutrient	?	see PNA	Single constraining factor	PNA	Internal		/	/	The handling of 1 metric tons of sludge in dry matter	Sweden	Yes	No
87		Lundin M., Olofsson M., Pettersson G.J., Zetterlund H.	Environmental and economic assessment of sewage sludge handling options	ALCA (inex.)	2004	Sewage sludge management	3	Cambi-KREPRO	The dewatered sewage sludge is hydrolyzed and the remaining organic fraction is incinerated. Phosphorus is recovered as ferric phosphate. The dissolved organic material is used as carbon source for denitrification process in the WWTP.	Sludge	Phosphate fraction + Organic fraction	N: 40% P: 70%	Bengtsson et al., 1997; Dalemo et al., 1998	N P C	N-fertilizer P-fertilizer Carbon source for bacteria	Ammonium nitrate Triple superphosphate Ethanol	Davis and Haglund, 1999 Literature	Nutrient + ?	?	see PNA	Single constraining factor	PNA	Internal		/	/	The handling of 1 metric tons of sludge in dry matter	Sweden	Yes	No
88	S	Tillman A.-M., Svingby M., Lundström H.	Life cycle assessment of municipal waste water systems	LCI study (with marginal market of avoided product)	1998	WWTP with nutrient recycling	3	AD	Digestated sludge is directly used as fertilizers.	Household wastewater	Digestate	?	?	N P	N-fertilizer P-fertilizer	?	?	?	?	?	?	/	/	Yes	/	/	The treatment of the waste water from one person equivalent (p.e.) during one year	Sweden	No	/
88		Tillman A.-M., Svingby M., Lundström H.	Life cycle assessment of municipal waste water systems	LCI study (with marginal market of avoided product)	1998	WWTP with nutrient recycling	3	AD + Composting	Composting of digestated sludge. The compost is to replace the usage of mineral fertilizer.	Household wastewater	Compost	?	?	N P	N-fertilizer P-fertilizer	?	?	?	?	?	?	/	/		/	/	The treatment of the waste water from one person equivalent (p.e.) during one year	Sweden	No	/
88		Tillman A.-M., Svingby M., Lundström H.	Life cycle assessment of municipal waste water systems	LCI study (with marginal market of avoided product)	1998	WWTP with nutrient recycling	3	ACoD	The pretreated sludge or feces is/are co-digested with other organic waste and the digestate is used in agriculture.	Household wastewater/ Feces + Organic waste	Digestate	?	?	N P	N-fertilizer P-fertilizer	?	?	?	?	?	?	/	/		/	/	The treatment of the waste water from one person equivalent (p.e.) during one year	Sweden	No	/
88		Tillman A.-M., Svingby M., Lundström H.	Life cycle assessment of municipal waste water systems	LCI study (with marginal market of avoided product)	1998	WWTP with nutrient recycling	3	Direct land application	The sludge from the pretreatment or urine is directly used in agriculture.	Household wastewater/ Greywater/ Urine	Sludge / Urine	?	?	N P	N-fertilizer P-fertilizer	?	?	?	?	?	?	/	/		/	/	The treatment of the waste water from one person equivalent (p.e.) during one year	Sweden	No	/
89	WOS	Linderholm, K; Tillman, AM; Mattsson, JE	Life cycle assessment of phosphorus alternatives for Swedish agriculture	?	2012	Nutrient recycling technology	2	Direct land application	The sludge produced from the municipal wastewater treatment plant is used as fertilizer in agriculture.	Sewage sludge	Sewage sludge	As mineral fertilizer	The different was neglected	N P	N fertilizer	?	HS Halland (2009); Yara (2012)	Nutrient	1	Assumption	Single constraining factor	Content-based	Internal	Yes	Alternative production system	Yes: Giving more credit to the avoided production	11 kg P (25.2 kg P2O5) to agricultural land, which was the average phosphorus output (removal with harvest) per hectare from Swedish farmland in 2007	Sweden	Yes	No
								Ostara	The liquid stream from the AD of the sewage is used for struvite precipitation.	Digestate (liquid)	Struvite															No, only slightly improve the results
90	WOS	Stichnothe, H; Schuchardt, F	Comparison of different treatment options for palm oil production waste on a life cycle basis	?	2010	Waste management	2	Direct land application	Direct use of empty fruit bunches produced by palm oil production as fertilizer.	Empty fruit bunches	Empty fruit bunches	N: 100% P: 100% K: 100% Mg: 100% (long-term)	?	N P K Mg	N fertilizer P fertilizer K fertilizer Mg fertilizer	Ammonium nitrate Triple phosphate Potassium chloride Magnesium sulfate	?	Nutrient	1	?	Single constraining factor	Content-based	Internal	Yes	No	/	To process 1000 kg of FFB (fresh fruit bunches)	Indonesia	Yes	No
								Composting	Composting of empty fruit bunches with palm oil mill effluent. The compost is used as fertilizer.	Empty fruit bunches + Palm oil mill effluent	Compost

## Sheet: Exclusion WOS
Authors	Article Title	Source Title	Abstract	Publication Year	DOI	Reason
Al-Jabri, H; Das, P; Thaher, M; Khan, S; AbdulQuadir, M	Potential utilization of waste nitrogen fertilizer from a fertilizer industry using marine microalgae	SCIENCE OF THE TOTAL ENVIRONMENT	This study investigated the feasibility of microalgal biomass production using waste nitrogen fertilizers (WNFs) generated by the Qatar Fertiliser Company (QAFCO). From the plant, three types of WNFs (WNF1, WNF2, and WNF3) were collected; WNF1 and WNF2 had high solubility (e.g., 1000 g/L) whereas WNF3 had low solubility (65 g/L). For a lower dosage (i.e., 100 mg N/L) of theseWNFs, >98% of nitroge…	2021	10.1016/j.scitotenv.2020.142532	Topic irrelevent
Arias, A; Feijoo, G; Moreira, MT	Benchmarking environmental and economic indicators of sludge management alternatives aimed at enhanced energy efficiency and nutrient recovery	JOURNAL OF ENVIRONMENTAL MANAGEMENT	Wastewater treatment plants (WWTPs) have been developed as multifunctional systems that aim to eliminate pollutants present in wastewater, manage the sludge produced and improve energy efficiency. Specifically, sludge management accounts for the largest share in operational costs. Considering the relevant role of sludge treatment within the overall management scheme, this study aims to evaluate d…	2021	10.1016/j.jenvman.2020.111594	No nutrient substitution
Drapanauskaite, D; Handler, RM; Fox, N; Baltrusaitis, J	Transformation of Liquid Digestate from the Solid-Separated Biogas Digestion Reactor Effluent into a Solid NH4HCO3 Fertilizer: Sustainable Process Engineering and Life Cycle Assessment	ACS SUSTAINABLE CHEMISTRY & ENGINEERING	The growing interest in biogas production to obtain renewable electricity has led to the increasing availability of liquid digestate byproducts containing major nutrients, such as nitrogen, and the need for sustainable engineering developments toward its utilization. Currently, digestate return to the fields has been most popular but suffers from many problems, such as potent greenhouse gas emiss…	2021	10.1021/acssuschemeng.0c08374	System expansion
Hilton, SP; Keoleian, GA; Daigger, GT; Zhou, BW; Love, NG	Life Cycle Assessment of Urine Diversion and Conversion to Fertilizer Products at the City Scale	ENVIRONMENTAL SCIENCE & TECHNOLOGY	Urine diversion has been proposed as an approach for producing renewable fertilizers and reducing nutrient loads to wastewater treatment plants. Life cycle assessment was used to compare environmental impacts of the operations phase of urine diversion and fertilizer processing systems [via (1) a urine concentration alternative and (2) a struvite precipitation and ion exchange alternative] at a ci…	2021	10.1021/acs.est.0c04195	System expansion
Kehrein, P; van Loosdrecht, M; Osseweijer, P; Posada, J; Dewulf, J	The SPPD-WRF Framework: A Novel and Holistic Methodology for Strategical Planning and Process Design of Water Resource Factories	SUSTAINABILITY	This paper guides decision making in more sustainable urban water management practices that feed into a circular economy by presenting a novel framework for conceptually designing and strategically planning wastewater treatment processes from a resource recovery perspective. Municipal wastewater cannot any longer be perceived as waste stream because a great variety of technologies are available t…	2020	10.3390/su12104168	Not an LCA case study
Romero-Gamez, M; Suarez-Rey, EM	Environmental footprint of cultivating strawberry in Spain	INTERNATIONAL JOURNAL OF LIFE CYCLE ASSESSMENT	Purpose Strawberry is cultivated worldwide under different production systems. The Life Cycle Assessment (LCA) methodology has been applied to evaluate the environmental footprint of different strawberry production systems in Spain, considering from the raw material extraction of inputs up to the farm gate, including transport of waste to the treatment plant. Methods Data from eight systems repre…	2020	10.1007/s11367-020-01740-w	Topic irrelevent
Barampouti, EM; Mai, S; Malamis, D; Moustakas, K; Loizidou, M	Exploring technological alternatives of nutrient recovery from digestate as a secondary resource	RENEWABLE & SUSTAINABLE ENERGY REVIEWS	The valorisation of anaerobic digestate in the context of circularity and sustainability is a very challenging issue, given its increasing production rate. The main aim of this paper was to study the established and emerging technological alternatives considering anaerobic digestate as secondary resource for nutrients recovery. Initially, after mapping the composition of digestate, elevated fluct…	2020	10.1016/j.rser.2020.110379	Not an LCA case study
Rufi-Salis, M; Brunnhofer, N; Petit-Boix, A; Gabarrell, X; Guisasola, A; Villalba, G	Can wastewater feed cities? Determining the feasibility and environmental burdens of struvite recovery and reuse for urban regions	SCIENCE OF THE TOTAL ENVIRONMENT	Phosphorus (P) resources are decreasing at an alarming rate due to global fertilizer use and insufficient nutrient recovery strategies. Currently, more circular approaches are promoted, such as recovering P from wastewater in the form of struvite. This is especially attractive for urban areas, where there is a growing trend of local crop production and large volumes of wastewater are treated in c…	2020	10.1016/j.scitotenv.2020.139783	System expansion
Klinglmair, M; Thomsen, M	Using Food Waste in Organic Fertilizer: Modelling Biogenic Carbon Sequestration with Associated Nutrient and Micropollutant Loads	SUSTAINABILITY	What are the effects, measured as flows of biogenic carbon, plant nutrients, and pollutants, of moving organic waste up the waste hierarchy? We present a case study of Denmark, where most of the organic fraction of household waste (OFHW) is incinerated, with ongoing efforts to increase bio-waste recycling. In this study, one-third of the OFHW produced in North Zealand, Denmark, is diverted away f…	2020	10.3390/su12187399	Not an LCA case study
Roldan, M; Bouzas, A; Seco, A; Mena, E; Mayor, A; Barat, R	An integral approach to sludge handling in a WWTP operated for EBPR aiming phosphorus recovery: Simulation of alternatives, LCA and LCC analyses	WATER RESEARCH	As phosphorus is a non-renewable resource mainly used to produce fertilizers and helps to provide food all over the world, the proper management of its reserves is a global concern since it is expected to become scarcer in the near future. In this work we assessed two different sludge line configurations aiming for P extraction and recovery before anaerobic digestion and compared them with the cl…	2020	10.1016/j.watres.2020.115647	Cut-off
Prado, LO; Souza, HHS; Chiquito, GM; Paulo, PL; Boncz, MA	A comparison of different scenarios for on-site reuse of blackwater and kitchen waste using the life cycle assessment methodology	ENVIRONMENTAL IMPACT ASSESSMENT REVIEW	Decentralized systems for treatment of domestic effluents have been suggested as a sustainable alternative for situations where conventional sanitation has not yet been established. This study compares three possible scenarios for the destination of separated blackwater (BW) and kitchen waste (KW), being: co-digestion of both (BW &KW) in loco with subsequent reuse of sub-products like nutrients a…	2020	10.1016/j.eiar.2019.106362	System expansion
Cobo, S; You, FQ; Dominguez-Ramos, A; Irabien, A	Noncooperative Game Theory To Ensure the Marketability of Organic Fertilizers within a Sustainable Circular Economy	ACS SUSTAINABLE CHEMISTRY & ENGINEERING	To optimize the environmental performance and the conflicting economic interests of the main stakeholders that interact within circular integrated waste management systems (CIWMSs), life cycle analysis and a game-theoretical model-based on the Stackelberg equilibrium-were integrated into a multiobjective optimization framework. The framework was used to determine the operational decisions and the…	2020	10.1021/acssuschemeng.9b07108	No nutrient substitution
Avadi, A	Screening LCA of French organic amendments and fertilisers	INTERNATIONAL JOURNAL OF LIFE CYCLE ASSESSMENT	Introduction In France, agricultural recycling of organic waste is widespread, but LCIs of organic waste treatments are scarce. This work presents LCIs of the most relevant organic waste treatments yielding residual organic amendments and fertilisers, and organic residue-based industrial processes yielding commercial organic amendments and fertilisers, in France. It also presents the results from…	2020	10.1007/s11367-020-01732-w	Allocation (economic)
Medeiros, DL; Queiroz, LM; Cohim, E; de Almeida-Neto, JA; Kiperstok, A	Human urine fertiliser in the Brazilian semi-arid: Environmental assessment and water-energy-nutrient nexus	SCIENCE OF THE TOTAL ENVIRONMENT	This manuscript aimed to identify the energy demand, and environmental aspects and impacts of crop fertilisation with human urine when compared to using mineral fertilisers. The Material Flow Analysis and Life Cycle Assessment methods were adopted covering the options from cradle to grave. The fertilisation with human urine included the collection, storage, transportation, application and field e…	2020	10.1016/j.scitotenv.2019.136145	No nutrient substitution
Porterfield, KK; Joblin, R; Neher, DA; Curtis, M; Dvorak, S; Rizzo, DM; Faulkner, JW; Roy, ED	Upcycling Phosphorus Recovered from Anaerobically Digested Dairy Manure to Support Production of Vegetables and Flowers	SUSTAINABILITY	Dissolved air flotation (DAF) separates phosphorus (P) -rich fine solids from anaerobically digested dairy manure, creating opportunities to export surplus P to the marketplace as a bagged plant food product. Seedlings of tomato and marigold were amended at various volume per volume (vto) ratios with plant foods consisting of fine solids upcycled (i.e., transformed into a higher quality product) …	2020	10.3390/su12031139	Not an LCA case study
Smol, M; Kulczycka, J; Lelek, L; Gorazda, K; Wzorek, Z	Life Cycle Assessment (LCA) of the integrated technology for the phosphorus recovery from sewage sludge ash (SSA) and fertilizers production	ARCHIVES OF ENVIRONMENTAL PROTECTION	The paper presents an application of Life Cycle Assessment (LCA) method for the environmental evaluation of the technologies for the fertilizers production. LCA has been used because it enables the most comprehensive identification, documentation and quantification of the potential impacts on the environment and the evaluation and comparison of all significant environmental aspects. The main obje…	2020	10.24425/aep.2020.133473	No nutrient substitution
Ma, XT; Zhai, YJ; Zhang, RR; Shen, XX; Zhang, TZ; Ji, CX; Yuan, XL; Hong, JL	Energy and carbon coupled water footprint analysis for straw pulp paper production	JOURNAL OF CLEANER PRODUCTION	Straw pulp in China, which is the world's largest producer of this material, suffers from water and energy shortages during its entire life cycle. However, limited systematic studies have focused on these issues, and decision makers need be provided with improvement methods for the environmental performance. Thus, an impact-oriented energy and carbon coupled water footprint analysis was conducted…	2019	10.1016/j.jclepro.2019.06.069	Topic irrelevent
Tasca, AL; Puccini, M	Leather tanning: Life cycle assessment of retanning, fatliquoring and dyeing	JOURNAL OF CLEANER PRODUCTION	Tanneries boost the local economic development, but lead to severe environmental pollution; hence, improving the environmental assessment of this sector is essential. In this paper, the Life Cycle Assessment method was applied to estimate impacts on the environment and human health of retanning, fatliquoring and dyeing. The analysis was performed from a gate to gate perspective. Moreover, sulpho …	2019	10.1016/j.jclepro.2019.03.335	Topic irrelevent
Wang, YS; Kuo, NW	Economic assessment of food waste co-digestion with sewage sludge in five Asian cities	JOURNAL OF MATERIAL CYCLES AND WASTE MANAGEMENT	Food waste not only causes waste treatment loading but also leads to loss of resources. Food waste co-digestion with sewage sludge is regarded as one of the optimal technologies to treat food waste and for the recovery of bio-energy and phosphorus. Besides, focus on the recovery rate and efficiency, environmental impacts and other benefits should also be considered when a new technology or policy…	2019	10.1007/s10163-019-00844-2	Not an LCA case study
Timonen, K; Sinkko, T; Luostarinen, S; Tampio, E; Joensuu, K	LCA of anaerobic digestion: Emission allocation for energy and digestate	JOURNAL OF CLEANER PRODUCTION	Anaerobic digestion produces renewable energy and recycled fertilisers, and thereby may improve energy and nutrient self-sufficiency and decrease greenhouse gas (GHG) emissions from energy production, agriculture and waste management. Finland aims to increase bioenergy production and nutrient recycling from agricultural biomass, via digestion of non-food crops and side streams from food productio…	2019	10.1016/j.jclepro.2019.06.085	Allocation (economic)
Cobo, S; Levis, JW; Dominguez-Ramos, A; Irabien, A	Economics of Enhancing Nutrient Circularity in an Organic Waste Valorization System	ENVIRONMENTAL SCIENCE & TECHNOLOGY	Waste managers struggle to comply with the European legislation that regulates the handling of organic waste. A waste management system that aims at recovering nutrients from the municipal organic waste generated in the Spanish region of Cantabria was modeled by combining material flow analysis, life cycle assessment, and life cycle costing. The model was optimized to find system configurations t…	2019	10.1021/acs.est.8b06035	No nutrient substitution
Deviatkin, I; Lyu, LK; Chen, SQ; Havukainen, J; Wang, F; Horttanainen, M; Manttari, M	Technical implications and global warming potential of recovering nitrogen released during continuous thermal drying of sewage sludge	WASTE MANAGEMENT	Thermal drying and consequent incineration of sewage sludge result in an absolute loss of an important macronutrient - nitrogen. To fulfill the growing food demand, humanity relies more on industrial fixation of nitrogen, primarily via the Haber-Bosch process. The present paper examines the nitrogen release during continuous thermal drying of municipal sewage sludge and its consequent recovery fo…	2019	10.1016/j.wasman.2019.04.031	System expansion
Angeli, JRB; Morales, A; LeFloc'h, T; Lakel, A; Andres, Y	Anaerobic digestion and integration at urban scale: feedback and comparative case study	ENERGY SUSTAINABILITY AND SOCIETY	Background: The anaerobic digestion process is well studied and developed since the last 50 years, notably for farming implementation. Furthermore, the international energy agenda has shifted in favor of renewable resources. In this context, anaerobic digestion has been highlighted as a valuable source of green energy. At urban scale, since the 2000s, some eco-friendly districts and cities tried …	2018	10.1186/s13705-018-0170-3	Not an LCA case study (review)
de Boer, MA; Romeo-Hall, AG; Rooimans, TM; Slootweg, JC	An Assessment of the Drivers and Barriers for the Deployment of Urban Phosphorus Recovery Technologies: A Case Study of The Netherlands	SUSTAINABILITY	Phosphorus (P), being one of the building blocks of life, is essential for a multitude of applications, primarily for fertilizer usage. Sustainable management of phosphorus is becoming increasingly important in light of adverse environmental effects, ambiguous reserves, increasing global demand and unilateral dependence. Recovery of phosphorus from the biggest loss stream, communal wastewater, ha…	2018	10.3390/su10061790	Not an LCA case study
Guo, WY; Zhou, Y; Zhu, NW; Hu, HG; Shen, WH; Huang, XX; Zhang, TP; Wu, PX; Li, ZB	On site composting of food waste: A pilot scale case study in China	RESOURCES CONSERVATION AND RECYCLING	Composting is one of the effective strategies to treat excessive amount of food waste (FW). In this study, the mode of source separation by residents - composting in situ with complete equipment (CPEM) was proposed. Pilot scale facility covering 132 m(2) was constructed and operated to treat FW (6 t/d). Results showed that the composting CPEM including feeding, breaking, dewatering, spiral boosti…	2018	10.1016/j.resconrec.2018.01.033	Not an LCA case study
D'Imporzano, G; Veronesi, D; Salati, S; Adani, F	Carbon and nutrient recovery in the cultivation of Chlorella vulgaris: A life cycle assessment approach to comparing environmental performance	JOURNAL OF CLEANER PRODUCTION	Microalgae cultivation is arousing interest for its ability to provide biomass for food, feed and energy. Microalgae are more efficient in converting solar energy into biomass than terrestrial plants, and microalgae cultivated in a mixotrophic mode showed a higher biomass productivity. This work aimed to evaluate the environmental impacts of the cultivation of microalgae in autotrophy and mixotro…	2018	10.1016/j.jclepro.2018.05.174	Topic irrelevent
Cobo, S; Dominguez-Ramos, A; Irabien, A	Trade-Offs between Nutrient Circularity and Environmental Impacts in the Management of Organic Waste	ENVIRONMENTAL SCIENCE & TECHNOLOGY	Measuring the circularity of resources is essential to assessing the performance of a circular economy. This work aims at proposing an indicator that quantifies how effective a system is at extending the lifetime of its waste components after they have been discarded. The developed indicator was applied to study the circularity of nutrients within a system that handles the organic waste (OW) gene…	2018	10.1021/acs.est.8b01590	No nutrient substitution
Cobo, S; Dominguez-Ramos, A; Irabien, A	Minimization of Resource Consumption and Carbon Footprint of a Circular Organic Waste Valorization System	ACS SUSTAINABLE CHEMISTRY & ENGINEERING	The efficient management of municipal organic waste (OW) will contribute to the transition to a circular economy of nutrients. The goal of this work is to determine the optimal configuration of a waste management system that valorizes the OW generated in Cantabria. The model was developed with the EASETECH and the DNDC softwares, and it assumes that the products generated from the OW (compost, di…	2018	10.1021/acssuschemeng.7b03767	No nutrient substutition
Fan, W; Bryant, L; Srisupan, M; Trembly, J	An assessment of hydrothermal treatment of dairy waste as a tool for a sustainable phosphorus supply chain in comparison with commercial phosphatic fertilizers	CLEAN TECHNOLOGIES AND ENVIRONMENTAL POLICY	Hydrothermal treatment has been proven efficient in immobilizing phosphorus and other macronutrients from animal waste; however, there are still gaps in understanding the best end-use applications for nutrient-dense biochars. In this research, aqueous phase phosphorus availability (P (aq)) of biochars produced at various temperatures and residence times was determined in pH 5.5 citric acid for 8 …	2018	10.1007/s10098-017-1440-z	Not an LCA case study
Hanserud, OS; Cherubini, F; Ogaard, AF; Muller, DB; Brattebo, H	Choice of mineral fertilizer substitution principle strongly influences LCA environmental benefits of nutrient cycling in the agri-food system	SCIENCE OF THE TOTAL ENVIRONMENT	Increased nutrient cycling in the agri-food system is a way to achieve a healthier nutrient stewardship and more sustainable food production. In life cycle assessment (LCA) studies, use of recycled fertilizer products is often credited by the substitution method, which subtracts the environmental burdens associated with avoided production of mineral fertilizer from the system under study. The env…	2018	10.1016/j.scitotenv.2017.09.215	Substitution methods investigation and with own case study
Ylmen, R; Gustafsson, AMK; Camerani-Pinzani, C; Steenari, BM	Recovery of phosphorous from industrial waste water by oxidation and precipitation	ENVIRONMENTAL TECHNOLOGY	This paper describes the development of a method for recovery of phosphorous from one of the waste waters at an Akzo Nobel chemical plant in Ale close to Goteborg. It was found that it is possible to transform the phosphorous in the waste water to a saleable product, i.e. a slowly dissolving fertilizer. The developed process includes oxidation of phosphite to phosphate with hydrogen peroxide and …	2018	10.1080/09593330.2017.1342698	No nutrient substitution
Magri, A; Giovannini, F; Connan, R; Bridoux, G; Beline, F	Nutrient management from biogas digester effluents: a bibliometric-based analysis of publications and patents	INTERNATIONAL JOURNAL OF ENVIRONMENTAL SCIENCE AND TECHNOLOGY	Interest in organic waste(water) processing by anaerobic digestion to produce biogas as renewable energy source has increased significantly in recent years. The characteristics of the digested effluents vary depending on the feedstocks treated, and different handling alternatives are possible. This study reviews advances in science and technology in the specific field of nutrient (nitrogen and ph…	2017	10.1007/s13762-017-1293-3	Not an LCA case study
Thomsen, TP; Sarossy, Z; Ahrenfeldt, J; Henriksen, UB; Frandsen, FJ; Muller-Stover, DS	Changes imposed by pyrolysis, thermal gasification and incineration on composition and phosphorus fertilizer quality of municipal sewage sludge	JOURNAL OF ENVIRONMENTAL MANAGEMENT	Fertilizer quality of ash and char from incineration, gasification and pyrolysis of a single municipal sewage sludge sample were investigated by comparing composition and phosphorus (P) plant availability. A process for post oxidation of gasification ash and pyrolysis char was developed and the oxidized materials were investigated as well. Sequential extraction with full elemental balances of the…	2017	10.1016/j.jenvman.2017.04.072	Not an LCA case study
Thomsen, TP; Hauggaard-Nielsen, H; Gobel, B; Stoholm, P; Ahrenfeldt, J; Henriksen, UB; Muller-Stover, DS	Low temperature circulating fluidized bed gasification and co-gasification of municipal sewage sludge. Part 2: Evaluation of ash materials as phosphorus fertilizer	WASTE MANAGEMENT	The study is part 2 of 2 in an investigation of gasification and co-gasification of municipal sewage sludge in low temperature gasifiers. In this work, solid residuals from thermal gasification and co-gasification of municipal sewage sludge were investigated for their potential use as fertilizer. Ashes from five different low temperature circulating fluidized bed (LT-CFB) gasification campaigns i…	2017	10.1016/j.wasman.2017.04.043	Not an LCA case study
Arias, O; Vina, S; Uzal, M; Soto, M	Composting of pig manure and forest green waste amended with industrial sludge	SCIENCE OF THE TOTAL ENVIRONMENT	The aim of this research was to study the composting of chestnut forest green waste (FGW) from short rotation chestnut stands amended with sludge resulting from the manufacture of Medium Density Fibreboard (MDFS) and pig manure (PM). Both FGW and MDFS presented low biodegradation potential but different characteristics in granulometry and bulk density that make its mixture of interest to achieve …	2017	10.1016/j.scitotenv.2017.02.118	Not an LCA case study
Thitanuwat, B; Polprasert, C; Englande, AJ	Green residues from Bangkok green space for renewable energy recovery, phosphorus recycling and greenhouse gases emission reduction	WASTE MANAGEMENT	Effective ways to integrate human life quality, environmental pollution mitigation and efficient waste management strategies are becoming a crisis challenge for sustainable urban development. The aims of this study are: (1) to evaluate and recommend an optimum Urban Green Space (UGS) area for the Bangkok Metropolitan Administration (BMA); and (2) to quantify potential renewable resources includin…	2017	10.10151/j.wasman.2016.12.012	Not an LCA case study
Bartzas, G; Komnitsas, K	Life cycle analysis of pistachio production in Greece	SCIENCE OF THE TOTAL ENVIRONMENT	In the present paper, a life cycle assessment (LCA) study regarding pistachio (Pistacia vera L.) cultivation in Aegina island, Greece, was performed to evaluate the energy use footprint and the associated environmental impacts. In this context, a detailed life cycle inventory was created based on site-survey data and used for a holistic cradle-to-farm gate LCA analysis using the GaBi 6.5 software…	2017	10.1016/j.scitotenv.2017.03.251	Topic irrelevent
Shiu, HY; Lee, M; Chiueh, PT	Water reclamation and sludge recycling scenarios for sustainable resource management in a wastewater treatment plant in Kinmen islands, Taiwan	JOURNAL OF CLEANER PRODUCTION	Sustainable resource management in small islands is very challenging. To address the challenges, four water and waste management strategies were proposed for a wastewater treatment plant in the Kinmen islands, Taiwan. Life cycle assessment was employed for evaluation of the environmental impacts and benefits (i.e., avoidance of impacts) associated with the resource management strategies at the pl…	2017	10.1016/j.jclepro.2017.03.110	No nutrient substitution
Mbaya, AMK; Dai, J; Chen, GH	Potential benefits and environmental life cycle assessment of equipping buildings in dense cities for struvite production from source-separated human urine	JOURNAL OF CLEANER PRODUCTION	The risk of a worldwide phosphorus (P) crisis has been predicted in the past ten years by many researchers and organizations who sought alternative resources of P. Source-separation of urine is being widely considered as a suitable waste stream for P recovery to mitigate the shortage of P while also preventing the eutrophication of receiving waters. In dense cities, urine separation and P recover…	2017	10.1016/j.jclepro.2016.12.111	No nutrient substitution
Moore, CCS; Nogueira, AR; Kulay, L	Environmental and energy assessment of the substitution of chemical fertilizers for industrial wastes of ethanol production in sugarcane cultivation in Brazil	INTERNATIONAL JOURNAL OF LIFE CYCLE ASSESSMENT	Purpose Vinasse and filter cake are residues of bioethanol processing that are used to be recycled as fertilizers in sugarcane plantation. Studies related to the environmental dimension on this practice are concerned only with the effects on water and soil. The present study examines the systemic effects of replacing chemical fertilizers with vinasse and filter cake on the environmental performan…	2017	10.1007/s11367-016-1074-0	Closed loop nutrient recycling (No nutrient substitution)
Mu, DY; Horowitz, N; Casey, M; Jones, K	Environmental and economic analysis of an in-vessel food waste composting system at Kean University in the US	WASTE MANAGEMENT	A composting system provides many benefits towards achieving sustainability such as, replacing fertilizer use, increasing the quantity of produce sold, and diverting organic wastes from landfills. This study delves into the many benefits a composting system provided by utilizing an established composting system at Kean University (KU) in New jersey, as a scale project to examine the composters' e…	2017	10.1016/j.wasman.2016.10.026	Closed loop nutrient recycling (No nutrient substitution)
Liu, HT	Achilles heel of environmental risk from recycling of sludge to soil as amendment: A summary in recent ten years (2007-2016)	WASTE MANAGEMENT	Recycling sludge as a soil amendment has both positive and negative effects because of its enrichment in both nutrients and contaminants. So far; the negative effect has to be extensively investigated that the severities of different types of contaminants also remain unclear. The environmental behavior and risk of organic contaminant and pharmaceuticals, heavy metal and salt as well as pathogenic…	2016	10.1016/j.wasman.2016.05.028	Not an LCA case study
Tampio, E; Marttinen, S; Rintala, J	Liquid fertilizer products from anaerobic digestion of food waste: mass, nutrient and energy balance of four digestate liquid treatment systems	JOURNAL OF CLEANER PRODUCTION	This study compared four different digestate liquid treatment systems of a theoretical anaerobic digestion plant in order to facilitate the utilization of municipal food waste nutrients in agriculture. The mass, nutrient and energy balances of a theoretical plant digesting 60 Idly of food waste were used to evaluate the feasibility of the treatments to concentrate nutrients into liquid fertilizer…	2016	10.1016/j.jclepro.2016.03.127	Not an LCA case study
Hansupalak, N; Piromkraipak, P; Tamthirat, P; Manitsorasak, A; Sriroth, K; Tran, T	Biogas reduces the carbon footprint of cassava starch: a comparative assessment with fuel oil	JOURNAL OF CLEANER PRODUCTION	In the past 10 years, 90% of cassava starch factories in Thailand have switched from fuel oil to renewable biogas, to cover part of their energy needs. The environmental benefits of switching to biogas have not been assessed quantitatively. To alleviate this, this study assessed 100-year greenhouse gas (GHG) emissions, or carbon footprint (CF), of cassava starch production for four factories in T…	2016	10.1016/j.jclepro.2015.06.138	Topic irrelevent
Heimersson, S; Svanstrom, M; Laera, G; Peters, G	Life cycle inventory practices for major nitrogen, phosphorus and carbon flows in wastewater and sludge management systems	INTERNATIONAL JOURNAL OF LIFE CYCLE ASSESSMENT	Nitrogen, phosphorus and carbon originating from wastewater and sludge can, depending on their partitioning during wastewater treatment, either become available as potential resources or leave as emissions. Several reviews have highlighted the dependence of life cycle assessment (LCA) results on the inventory data. To provide a foundation for future assessments of systems in which resources are u…	2016	10.1007/s11367-016-1095-8	Not an LCA case study
Eriksson, O; Bisaillon, M; Haraldsson, M; Sundberg, J	Enhancement of biogas production from food waste and sewage sludge - Environmental and economic life cycle performance	JOURNAL OF ENVIRONMENTAL MANAGEMENT	Management of municipal solid waste is an efficient method to increase resource efficiency, as well as to replace fossil fuels with renewable energy sources due to that (1) waste to a large extent is renewable as it consists of food waste, paper, wood etc. and (2) when energy and materials are recovered from waste treatment, fossil fuels can be substituted. In this paper results from a comprehens…	2016	10.1016/j.jenvman.2016.03.022	No nutrient substitution
Zabaleta, I; Rodic, L	Recovery of essential nutrients from municipal solid waste - Impact of waste management infrastructure and governance aspects	WASTE MANAGEMENT	Every year 120-140 million tonnes of bio-waste are generated in Europe, most of which is landfilled, incinerated or stabilized and used as covering material in landfill operation. None of these practices enables the recovery of essential nutrients such as phosphorus (P) and nitrogen (N), which are in great demand for agricultural production. Recovery of these nutrients is a matter of internationa…	2015	10.1016/j.wasman.2015.07.033	Not an LCA case study
Lam, L; Kurisu, K; Hanaki, K	Comparative environmental impacts of source-separation systems for domestic wastewater management in rural China	JOURNAL OF CLEANER PRODUCTION	To address issues of poor sanitation and water scarcity in developing countries, innovative wastewater management systems should be proposed, based on considerations of life cycle and local environmental impacts. Source-separation separates urine, feces, and gray water, enhancing the reuse of nutrients, and is considered a promising wastewater treatment method. This study evaluates the life cycle…	2015	10.1016/j.jclepro.2015.04.126	System expansion
Vazquez-Rowe, I; Golkowska, K; Lebuf, V; Vaneeckhaute, C; Michels, E; Meers, E; Benetto, E; Koster, D	Environmental assessment of digestate treatment technologies using LCA methodology	WASTE MANAGEMENT	The production of biogas from energy crops, organic waste and manure has augmented considerably the amounts of digestate available in Flanders. This has pushed authorities to steadily introduce legislative changes to promote its use as a fertilising agent. There is limited arable land in Flanders, which entails that digestate has to compete with animal manure to be spread. This forces many anaero…	2015	10.1016/j.wasman.2015.05.007	No nutrient substitution
Holm, B; Heinsoo, K	Biogas Digestate Suitability for the Fertilisation of Young Salix Plants	BALTIC FORESTRY	We analysed the possibilities to use the digestate from pig slurry anaerobic digestion as a nutrient supply for Short Rotation Coppice Salix species. Our greenhouse experiment revealed that the total biomass (roots, cutting and shoots) of one-year-old Salix plants treated with moderate amounts (hereafter 0.5F) of digestate during the vegetative period was more than twice that of control (hereafte…	2014		Not an LCA case study
Pizzol, M; Smart, JCR; Thomsen, M	External costs of cadmium emissions to soil: a drawback of phosphorus fertilizers	JOURNAL OF CLEANER PRODUCTION	In this study the Impact-Pathway Approach methodology was applied for monetary valuation of health impacts due to cadmium emitted to soil as a micro-pollutant present in phosphorus fertilizers. Due to the high persistency of cadmium in soil, and high soil-to-plant transfer rates, humans are exposed to cadmium through their diet causing potential adverse health impacts. Future scenarios for cadmiu…	2014	10.1016/j.jclepro.2013.12.080	Not an LCA case study
Spangberg, J; Tidaker, P; Jonsson, H	Environmental impact of recycling nutrients in human excreta to agriculture compared with enhanced wastewater treatment	SCIENCE OF THE TOTAL ENVIRONMENT	Human excreta are potential sources of plant nutrients, but are today usually considered a waste to be disposed of. The requirements on wastewater treatment plants (WWTPs) to remove nitrogen and phosphorus are increasing and to meet these requirements, more energy and chemicals are needed by WWTPs. Separating the nutrient-rich wastewater fractions at source and recycling them to agriculture as fe…	2014	10.1016/j.scitotenv.2014.05.123	System expansion
Contreras, F; Hanaki, K; Aramaki, T; Binder, CR	Application of the analytic hierarchy process to the analysis of wastewater nutrient recycling options: a case based on a group study of residents in the city of Zurich	WATER SCIENCE AND TECHNOLOGY	The recycling of anthropogenic nutrients derived from the wastewater management systems is often characterized by a complex and uncertain scenario, due not only to the nature of the process but also to the involvement of different stakeholder groups. Over the past 10 years in Switzerland, policies regarding the use of sewage sludge as fertilizer have gradually shifted to a ban on use in agricultu…	2013	10.2166/wst.2013.545	No nutrient substitution
Mo, WW; Zhang, Q	Can municipal wastewater treatment systems be carbon neutral?	JOURNAL OF ENVIRONMENTAL MANAGEMENT	Municipal wastewater treatment has emerged as one of the largest resource consumers in the US. As a result, the goal of municipal wastewater systems has extended from protecting receiving water and human health to improving the system sustainability. This study used the embodied energy and the associated carbon footprint to measure the resource consumption and recovery in wastewater systems. Thre…	2012	10.1016/j.jenvman.2012.08.014	Not an LCA case study
Havukainen, J; Zavarauskas, K; Denafas, G; Luoranen, M; Kahiluoto, H; Kuisma, M; Horttanainen, M	Potential of energy and nutrient recovery from biodegradable waste by co-treatment in Lithuania	WASTE MANAGEMENT & RESEARCH	Biodegradable waste quantities in Lithuania and their potential for the co-treatment in renewable energy and organic fertilizer production were investigated. Two scenarios were formulated to study the differences of the amounts of obtainable energy and fertilizers between different ways of utilization. In the first scenario, only digestion was used, and in the second scenario, materials other tha…	2012	10.1177/0734242X11427945	Not an LCA case study
Khatiwada, D; Silveira, S	Greenhouse gas balances of molasses based ethanol in Nepal	JOURNAL OF CLEANER PRODUCTION	This paper evaluates life cycle greenhouse gas (GHG) balances in production and use of molasses-based ethanol (EtOH) in Nepal. The total life cycle emissions of EtOH is estimated at 432.5 kgCO(2eq) m(-3) ethanol (i.e. 20.4 gCO(2eq) MJ(-1)). Avoided emissions are 76.6% when conventional gasoline is replaced by molasses derived ethanol. A sensitivity analysis was performed to verify the impact of v…	2011	10.1016/j.jclepro.2011.04.012	Topic irrelevent
Schuchardt, F; Vorlop, KD	Estimation of the carbon amount in biomass residues in Germany for hydrothermal carbonisation (HTC) and disposal of HTC-coal to the soil	LANDBAUFORSCHUNG	Crop waste and residues from agriculture, forestry, food industry, biotope and landscape management and municipalities are raw materials for energy and material recycling. They contain nutrients and trace elements and can maintain soil fertility. Partially there is a competition for its use at the market, because no unused and free waste is available. The total amount of crop waste and residues i…	2010		Not an LCA case study
Lardon, L; Helias, A; Sialve, B; Steyer, JP; Bernard, O	Life-Cycle Assessment of Biodiesel Production from Microalgae	ENVIRONMENTAL SCIENCE & TECHNOLOGY	This paper provides an analysis of the potential environmental impacts of biodiesel production from microalgae. High production yields of microalgae have called forth interest of economic and scientific actors but it is still unclear whether the production of biodiesel is environmentally interesting and which transformation steps need further adjustment and optimization. A comparative LCA study o…	2009	10.1021/es900705j	Topic irrelevent
Tidaker, P; Mattsson, B; Jonsson, H	Environmental impact of wheat production using human urine and mineral fertilisers - a scenario study	JOURNAL OF CLEANER PRODUCTION	Life cycle assessment methodology was used to compare conventional wheat production with a scenario where source-separated human urine replaced mineral fertilisers. A change-orientated perspective was used, including differences in capital goods between the scenarios. An optimal fertilising strategy regarding application time, technique and substitution of mineral fertiliser was demonstrated to b…	2007	10.1016/j.jclepro.2005.04.019	No nutrient substitution
Svanstrom, M; Patrick, TN; Froling, M; Peterson, AA; Tester, JW	Choosing between green innovative technologies - Hydrothermal processing of biowastes	JOURNAL OF ADVANCED OXIDATION TECHNOLOGIES	The environmental performance of two different hydrothermal processes, supercritical water oxidation (SCWO) and hydrothermal conversion (HTC), for treatment of waste biomass, were studied using life cycle assessment (LCA). Waste streams studied were sewage sludge and turkey food processing waste. The SCWO process completely oxidizes the waste stream, decomposing all organic contaminants, and make…	2007		Conference paper
Tidaker, P; Karrman, E; Baky, A; Jonsson, H	Wastewater management integrated with farming - an environmental systems analysis of a Swedish country town	RESOURCES CONSERVATION AND RECYCLING	Recycling of plant nutrients in sewage products to arable land is considered to be a step towards a more sustainable society. Sewage sludge is the predominant sewage fertiliser product available today, but the use of sewage sludge in agriculture has been questioned as regards hazardous substances. In this respect, blackwater from separating systems seems to better fulfil agricultural requirements…	2006	10.1016/j.resconrec.2005.12.003	No nutrient substitution
Hansen, TL; Christensen, TH; Schmidt, S	Environmental modelling of use of treated organic waste on agricultural land: a comparison of existing models for life cycle assessment of waste systems	WASTE MANAGEMENT & RESEARCH	Modelling of environmental impacts from the application of treated organic Municipal solid waste (MSW) in agriculture differs widely between different models for environmental assessment of waste systems. In this comparative Study five models were examined concerning quantification and impact assessment of environmental effects from land application of treated organic MSW: DST (Decision Support T…	2006	10.1177/0734242X06062485	Topic irrelevent
Maurer, M; Schwegler, P; Larsen, TA	Nutrients in urine: energetic aspects of removal and recovery	WATER SCIENCE AND TECHNOLOGY	The analysis of different removal and recovery techniques for nutrients in urine shows that in many cases recovery is energetically more efficient than removal and new-production from natural resources. Considering only the running electricity and fossil energy requirements for the traditional way of wastewater treatment and fertiliser production, the following specific energy requirements can be…	2003		Conference paper
Dalemo, M; Sonesson, U; Jonsson, H; Bjorklund, A	Effects of including nitrogen emissions from soil in environmental systems analysis of waste management strategies	RESOURCES CONSERVATION AND RECYCLING	The environmental impacts of nitrogen emissions from soil resulting from the use of organic fertilizers, such as manure, are large compared with the corresponding impacts of mineral fertilizers. However, soil emissions are rarely included in systems analysis of waste management strategies. This study examines whether the inclusion of soil emissions can affect the environmental ranking of systems …	1998	10.1016/S0921-3449(98)00064-0	System expansion

## Sheet: Exclusion Scopus
Authors	Title	Source title	Abstract	Year	DOI	Reason
Fahimi A., Federici S., Depero L.E., Valentim B., Vassura I., Ceruti F., Cutaia L., Bontempi E.	Evaluation of the sustainability of technologies to recover phosphorus from sewage sludge ash based on embodied energy and CO2 footprint	Journal of Cleaner Production	This paper reports a novel and simplified approach for sustainability evaluation of new technologies, based on the use of two parameters (i.e. embodied energy and CO2 footprint) that account for the energy and emissions involved in the formation of a material, suitable to perform pre-screening analysis, preliminary to life cycle assessment. This new approach is presented and used to compare the a…	2021	10.1016/j.jclepro.2020.125762	Not an LCA case study
Teow Y.H., Chong M.T., Ho K.C., Mohammad A.W.	Comparative environmental impact evaluation using life cycle assessment approach: a case study of integrated membrane-filtration system for the treatment of aerobically-digested palm oil mill effluent	Sustainable Environment Research	Aiming to mitigate wastewater pollution arising from the palm oil industry, this university-industry research-and-development project focused on the integration of serial treatment processes, including the use of moving bed biofilm reactor (MBBR), pre-treatment with sand filters and activated carbon filters, and membrane technology for aerobically-digested palm oil mill effluent (POME) treatment.…	2021	10.1186/s42834-021-00089-5	No nutrient recycling
Yoshikawa N., Matsuda T., Amano K.	Life cycle environmental and economic impact of a food waste recycling-farming system: a case study of organic vegetable farming in Japan	International Journal of Life Cycle Assessment	Purpose: Bio-based recycling systems and agricultural production using recycled materials are often evaluated separately. This study performs an environmental and socio-economic life cycle assessment (LCA) of a food waste treatment and spinach farming system in Japan. The environmental and economic tradeoffs of introducing a recycling system and the net environmental benefit of the substitution o…	2021	10.1007/s11367-021-01879-0	System expansion
Lin H., Borrion A., da Fonseca-Zang W.A., Zang J.W., Leandro W.M., Campos L.C.	Life cycle assessment of a biogas system for cassava processing in Brazil to close the loop in the water-waste-energy-food nexus	Journal of Cleaner Production	Biogas, generated from anaerobic digester (AD), has been one of the promising sources of renewable energy. To manage the organic waste from small cassava industry in Brazil, a waste-water-energy-food nexus (WWEF) system is proposed, combining AD and co-generation or combined heat and power (CHP) plants. However, the environmental impacts and benefits of this system are yet not known. By using Lif…	2021	10.1016/j.jclepro.2021.126861	No nutrient substitution (Closed loop nutrient recycling)
Andreasi Bassi S., Boldrin A., Frenna G., Astrup T.F.	An environmental and economic assessment of bioplastic from urban biowaste. The example of polyhydroxyalkanoate	Bioresource Technology	Bio-based and biodegradable plastics promise considerable reductions in our dependency on fossil fuels and in the environmental impacts of plastic waste. This study quantifies the environmental and economic consequences of diverting municipal food waste and wastewater sewage sludge from traditional management to the biorefinery-based production of polyhydroxyalkanoates (PHA) in five geographical …	2021	10.1016/j.biortech.2021.124813	Topic irrelevent
Zhou Y., Xiao C., Yang S., Yin H., Yang Z., Chi R.	Life cycle assessment of feed grade mono-dicalcium phosphate production in China, a case study	Journal of Cleaner Production	Due to the gradual scarcity of global phosphorus resources and water pollution problem caused by animal excreted phosphorus, feed grade mono-dicalcium phosphate is expected to gradually replace other feed phosphates with its high phosphorus absorption rate, low phosphorus pollution and good economic benefits advantages. This work employs a cradle-to-gate life cycle assessment and life cycle costi…	2021	10.1016/j.jclepro.2020.125182	Topic irrelevent
Kyttä V., Helenius J., Tuomisto H.L.	Carbon footprint and energy use of recycled fertilizers in arable farming	Journal of Cleaner Production	The globally growing demand to produce more food with fewer inputs, less energy, and lower greenhouse gas (GHG) emissions challenges current agricultural practices. Recycled fertilizers made of various side streams and types of biomass have been developed mainly to improve nutrient recycling in food systems. However, the knowledge of the impacts of different recycled fertilizers on GHG emissions …	2021	10.1016/j.jclepro.2020.125063	No nutrient substitution
Tonini D., Schrijvers D., Nessi S., Garcia-Gutierrez P., Giuntoli J.	Carbon footprint of plastic from biomass and recycled feedstock: methodological insights	International Journal of Life Cycle Assessment	Purpose: A circular (bio)economy is sustained through use of secondary raw material and biomass feedstock. In life cycle assessment (LCA), the approach applied to address the impact of these feedstocks is often unclear, in respect to both handling of the recycled content and End-of-Life recyclability and disposal. Further, the modelling approach adopted to account for land use change (LUC) and bi…	2021	10.1007/s11367-020-01853-2	Topic irrelevent
Pradel M., Garcia J., Vaija M.S.	A framework for good practices to assess abiotic mineral resource depletion in Life Cycle Assessment	Journal of Cleaner Production	Abiotic mineral resource assessment is a long lasting area of interest in Life Cycle Assessment (LCA) with major progress in the field of industry and research during the last ten years. The complex nature of abiotic mineral resource assessment has brought out a multitude of indicators based on different principles and foundations, making it sometimes difficult to choose and interpret LCA results…	2021	10.1016/j.jclepro.2020.123296	Not an LCA case study
Meneses-Jácome A., Ruiz-Colorado A.A.	A new approach of ecologically based life cycle assessment for biological wastewater treatments focused on energy recovery goals	Environmental Science and Pollution Research	The energy potential of high-organic loaded agro-industrial effluents receiving biological treatment is often neglected, particularly in emergent regions, because of different technical and regulatory drawbacks. In addition, small alternative bioenergy sources are forced to compete disadvantageously with conventional energy supply, hindering their more extended exploitation. Thus, smart strategie…	2021	10.1007/s11356-020-10703-5	No nutrient recycling
LaTurner Z.W., Bennett G.N., San K.-Y., Stadler L.B.	Single cell protein production from food waste using purple non-sulfur bacteria shows economically viable protein products have higher environmental impacts	Journal of Cleaner Production	Landfilling of food waste in the United States is a source of unutilized resources and environmental risks. As cities look to divert food waste from landfills, microorganisms may hold the answer. Purple non-sulfur bacteria are a group of microorganisms that can treat and extract resources from food waste to produce a protein supplement for animal feed. This study includes a life cycle assessment …	2020	10.1016/j.jclepro.2020.123114	Topic irrelevent
Tian X., Richardson R.E., Tester J.W., Lozano J.L., You F.	Retrofitting Municipal Wastewater Treatment Facilities toward a Greener and Circular Economy by Virtue of Resource Recovery: Techno-Economic Analysis and Life Cycle Assessment	ACS Sustainable Chemistry and Engineering	A promising route to transition wastewater treatment facilities (WWTFs) from energy-consuming to net energy-positive is to retrofit existing facilities with process modifications, residual biosolid upcycling, and effluent thermal energy recovery. This study assesses the economics and life cycle environmental impacts of three proposed retrofits of WWTFs that consider thermochemical conversion tech…	2020	10.1021/acssuschemeng.0c05189	No nutrient recycling
Quina M.J., Garcia R., Simões A.S., Quinta-Ferreira R.M.	Life cycle assessment of lightweight aggregates produced with ashes from municipal solid waste incineration	Journal of Material Cycles and Waste Management	Air pollution control residues (APCr) from municipal solid waste (MSW) incineration are hazardous waste, and their management requires holistic approaches within technical, economical, legislative, and environmental constraints. This work deals with the recycling of APCr for producing lightweight aggregates (LWA) commonly manufactured by firing natural clay. The main objectives are to evaluate th…	2020	10.1007/s10163-020-01079-2	Topic irrelevent
Diaz-Elsayed N., Rezaei N., Ndiaye A., Zhang Q.	Trends in the environmental and economic sustainability of wastewater-based resource recovery: A review	Journal of Cleaner Production	Wastewater is rich with valuable resources available for recovery. Although the resource recovery process can enable the offset of freshwater withdrawals, fertilizer production, and the use of fossil fuels, it comes at a cost. This review focuses on the environmental and economic impacts of recovering water, energy, and nutrients from wastewater. Specifically, life cycle assessments and life cycl…	2020	10.1016/j.jclepro.2020.121598	Review
Arias A., Feijoo G., Moreira M.T.	Linking organic matter removal and biogas yield in the environmental profile of innovative wastewater treatment technologies	Journal of Cleaner Production	Wastewater treatment plants (WWTPs) need to abandon the linear concept and adapt to the circular philosophy integrating standards of technological performance but also environmental, economic and social indicators. However, this change cannot be made by merely replacing one technology, but integrated solutions need to be applied. In this framework, a new strategy of treatment has gained strength …	2020	10.1016/j.jclepro.2020.124292	No nutrient substitution
Arias A., Behera C.R., Feijoo G., Sin G., Moreira M.T.	Unravelling the environmental and economic impacts of innovative technologies for the enhancement of biogas production and sludge management in wastewater systems	Journal of Environmental Management	The retrofitting of wastewater treatment plants (WWTPs) should be addressed under sustainability criteria. It is well known that there are two elements that most penalize wastewater treatment: (i) energy requirements and (ii) sludge management. New technologies should reduce both of these drawbacks to address technical efficiency, carbon neutrality and reduced economic costs. In this context, the…	2020	10.1016/j.jenvman.2020.110965	No nutrient substitution
Paes M.X., de Medeiros G.A., Mancini S.D., Bortoleto A.P., Puppim de Oliveira J.A., Kulay L.A.	Municipal solid waste management: Integrated analysis of environmental and economic indicators based on life cycle assessment	Journal of Cleaner Production	This paper develops a method to analyze municipal solid waste management systems (MSWMS) that integrates environmental and economic indicators using Life Cycle Assessment (LCA) and Life Cycle Costing (LCC). The method was tested in the city of Sorocaba, Brazil, a medium size municipality typical of many developing countries. Environmental impacts were analyzed considering system expansion, which …	2020	10.1016/j.jclepro.2019.119848	Topic irrelevent
Slorach P.C., Jeswani H.K., Cuéllar-Franca R., Azapagic A.	Environmental sustainability in the food-energy-water-health nexus: A new methodology and an application to food waste in a circular economy	Waste Management	Current studies on the food-energy-water nexus do not capture effects on human health. This study presents a new methodology for assessing the environmental sustainability in the food-energy-water-health nexus on a life cycle basis. The environmental impacts, estimated through life cycle assessment, are used to determine a total impact on the nexus by assigning each life cycle impact to one of th…	2020	10.1016/j.wasman.2020.06.012	Topic irrelevent (adopting another existing LCA)
Jain S., Singhal S., Pandey S.	Environmental life cycle assessment of construction and demolition waste recycling: A case of urban India	Resources, Conservation and Recycling	The study compares life cycle environmental implications of two construction and demolition waste (C&DW) management alternatives, inert landfilling and integrated wet recycling, on many impact categories under several scenarios. Integrated wet-recycling valorizes coarse aggregates, sand, and soil, recovering over 95 percent of incoming C&DW waste. Using data from recycling plants operational in N…	2020	10.1016/j.resconrec.2019.104642	Topic irrelevent
Keller F., Lee R.P., Meyer B.	Life cycle assessment of global warming potential, resource depletion and acidification potential of fossil, renewable and secondary feedstock for olefin production in Germany	Journal of Cleaner Production	Lower olefins are the second most resource and emission intensive products in the manufacturing sector in Germany. Replacing conventional fossil feedstock with renewable or secondary feedstock thus represents a viable possibility to significantly increase the sustainability of the German industry. The environmental impact associated with olefin production is generally determined by feedstock and …	2020	10.1016/j.jclepro.2019.119484	Topic irrelevent
Falahi M., Avami A.	Optimization of the municipal solid waste management system using a hybrid life cycle assessment–emergy approach in Tehran	Journal of Material Cycles and Waste Management	The sustainable design of the waste-management system is of crucial importance for cities like Tehran, capital of Iran. Tehran’s municipal solid-waste management has adopted modern practices and technologies very slowly. This study proposes the optimum pathway to reach maximum environmental benefits as well as the most cost-effective technologies according to the financial limits. The hybrid life…	2020	10.1007/s10163-019-00919-0	No nutrient substitution
Dino G.A., Cavallo A., Rossetti P., Garamvölgyi E., Sándo R., Coulon F.	Towards sustainable mining: Exploiting raw materials from extractive waste facilities	Sustainability (Switzerland)	The focus of the present research is on the exploitation of extractive waste to recover raw materials, considering the technological and economic factors, together with the environmental impacts, associated with extractive waste quarrying and dressing activities. The present study, based on a case history from Northern Italy (Montorfano and Baveno granite quarrying area), was intended to validate…	2020	10.3390/su12062383	Topic irrelevent
Ruffino B., Farina A., Dalmazzo D., Blengini G., Zanetti M., Santagata E.	Cost analysis and environmental assessment of recycling paint sludge in asphalt pavements	Environmental Science and Pollution Research	Paint sludge (PS) is a waste product coming from spray application of paints in automotive industry. For the first time, this work assessed the economic costs and environmental impacts connected to recycling PS in bituminous binders for asphalt pavement applications. Previous works have demonstrated that PS could be used as a replacement of up to 20% (w/w) of neat bitumen in the production of hot…	2020	10.1007/s11356-020-10037-2	Topic irrelevent
Aziz N.I.H.A., Hanafiah M.M.	Life cycle analysis of biogas production from anaerobic digestion of palm oil mill effluent	Renewable Energy	This study aims to evaluate the cradle-to-gate life cycle environmental performance of biogas production by the anaerobic digestion (AD) of POME. The life cycle assessment (LCA) was performed using the ReCiPe 2016 method and SimaPro 8.5 software. This study emphasizes on global warming (GWP), land use change (LUC) and water consumption (WCP) due to their significant contributions. It was found th…	2020	10.1016/j.renene.2019.06.084	Closed loop recycling (No nutrient substitution)
Mallinger K., Mergili M.	The global iron industry and the Anthropocene	Anthropocene Review	Iron ore is the most mined metal and the second most mined mineral in the world. The mining of iron ore and the processing of iron and steel increased sharply during the 20th century and peaked at the beginning of the 21st century. Associated processes along the iron ore cycle (mining, processing, recycling, weathering) such as the massive displacement of rock, the emission of waste and pollutant…	2020	10.1177/2053019620982332	Topic irrelevent
Catalán E., Komilis D., Sánchez A.	Environmental impact of cellulase production from coffee husks by solid-state fermentation: A life-cycle assessment	Journal of Cleaner Production	In this article, we present a study on the environmental impacts related to cellulase recovery from coffee husks (CH). The environmental impacts of the cellulase recovery process were determined using a comparative attributional life-cycle assessment (LCA) approach. The scenarios were developed according to a novel waste management system in which enzymes were produced during solid-state fermenta…	2019	10.1016/j.jclepro.2019.06.100	Topic irrelevent
Henriksen T., Levis J.W., Barlaz M.A., Damgaard A.	Approaches to fill data gaps and evaluate process completeness in LCA—perspectives from solid waste management systems	International Journal of Life Cycle Assessment	Purpose: Large data amounts are required in an LCA, but often, site-specific data are missing and less representative surrogate data must be used to fill data gaps. No standardized rules exist on how to address data gaps and process completeness. We suggest a systematic evaluation of process completeness, identification of data gaps, and application of surrogate values to fill the gaps. The study…	2019	10.1007/s11367-019-01592-z	Topic irrelevent
Das S., Lee S.-H., Kumar P., Kim K.-H., Lee S.S., Bhattacharya S.S.	Solid waste management: Scope and the challenge of sustainability	Journal of Cleaner Production	Solid waste management (SWM) is an integral part of an environmental management system. SWM approaches have been modified into a more practical and effective option to establish sustainability based on the “reduce”, “reuse”, and “recycle” (3R) principles. This review provides an overview of a wide range of existing SWM strategies with the following key objectives: (i) to comprehensively describe …	2019	10.1016/j.jclepro.2019.04.323	Review
Rebello T.A., Zulcão R., Calmon J.L., Gonçalves R.F.	Comparative life cycle assessment of ornamental stone processing waste recycling, sand, clay and limestone filler	Waste Management and Research	Owing to the cost of destination and transportation of ornamental stone processing waste, many studies focused on the reuse and recycling of this product. However, there is a scarcity of articles addressing the environmental viability of the recycling of ornamental stone. In this context, this study comprehends a comparative life cycle assessment of ornamental stone processing waste and conventio…	2019	10.1177/0734242X18819976	Topic irrelevent
Rezaei N., Diaz-Elsayed N., Mohebbi S., Xie X., Zhang Q.	A multi-criteria sustainability assessment of water reuse applications: a case study in Lakeland, Florida	Environmental Science: Water Research and Technology	Water shortage and water contamination necessitate adopting a reverse logistics and a closed-loop supply chain approach, which is the process of moving wastewater from its typical final destination back to the water supply chain with different levels of treatment for reuse. Hence, the incorporation of sustainability concepts through life cycle assessments for selecting reclaimed water application…	2019	10.1039/c8ew00336j	Topic (irrigation)
de Souza L.L.P., Lora E.E.S., Palacio J.C.E., Rocha M.H., Renó M.L.G., Venturini O.J.	Comparative environmental life cycle assessment of conventional vehicles with different fuel options, plug-in hybrid and electric vehicles for a sustainable transportation system in Brazil	Journal of Cleaner Production	The principal motivation of this work is to evaluate the existing fuel use (gasoline or ethanol) and new alternative source of power supply (electricity) for vehicles in Brazil, and to assess potential to consume less petroleum and non-renewable fuels, in order to reduce the air pollution and greenhouse gas emissions. In the literature, there are several relevant published works which focus on th…	2018	10.1016/j.jclepro.2018.08.236	Topic irrelevent
Buonocore E., Mellino S., De Angelis G., Liu G., Ulgiati S.	Life cycle assessment indicators of urban wastewater and sewage sludge treatment	Ecological Indicators	The world is facing a water quality crisis resulting from continuous population growth, urbanization, land use change, industrialization, unsustainable water use practices and wastewater management strategies, among others. In this context, wastewater treatment (WWT) facilities are of vital significance for urban systems. Wastewater management clearly plays a central role in achieving future wate…	2018	10.1016/j.ecolind.2016.04.047	Topic irrelevent
Arrigoni A., Beckett C.T.S., Ciancio D., Pelosato R., Dotelli G., Grillet A.-C.	Rammed Earth incorporating Recycled Concrete Aggregate: a sustainable, resistant and breathable construction solution	Resources, Conservation and Recycling	Construction and demolition debris, mainly concrete and masonry rubble, represent a significant share of municipal waste. Recycling crushed concrete aggregates and using them as substitutes for natural ones might therefore be determinant in reducing landfilling and mineral resource depletion. An innovative way to give new value to Recycled Concrete Aggregates (RCAs) is to ram them in layers to fo…	2018	10.1016/j.resconrec.2018.05.025	Topic irrelevent
Qin Z., Sun M., Luo X., Zhang H., Xie J., Chen H., Yang L., Shi L.	Life-cycle assessment of tobacco stalk utilization	Bioresource Technology	The aim of this work was to investigate the environmental performance of different tobacco stalk methods using Life Cycle Assessment (LCA). Three scenarios were established: biodegradable plant nursery tray (PNT) making, open burning, and indoor incineration. The results showed that 3380, 1590, 1320 kg CO2-eq, 25.7, 1.97,1.99 kg SO2-eq are generated for global warming and acidification in biodegr…	2018	10.1016/j.biortech.2018.05.110	Topic irrelevent
Olofsson J., Börjesson P.	Residual biomass as resource – Life-cycle environmental impact of wastes in circular resource systems	Journal of Cleaner Production	Within an envisioned circular bio-based economy, a key component is the valorization of biomass wastes and residues into valuable products. If the commonly used method of life-cycle assessment (LCA) is applied to such products, an update and adaptation of LCA practice is needed regarding potentially outdated assumptions of residual resources as free from environmental impact. This paper therefore…	2018	10.1016/j.jclepro.2018.06.115	Review
Amelio A., Figueroa Paredes D.A., Degrève J., Luis P., Van der Bruggen B., Espinosa J.	Conceptual model-based design and environmental evaluation of waste solvent technologies: Application to the separation of the mixture acetone-water	Separation Science and Technology (Philadelphia)	In this paper, two waste solvent technologies are presented as alternatives to the disposal of spent acetone-water mixtures. In the first alternative, a batch rectifier is used to concentrate the waste in order to obtain a distillate with a higher calorific value, which is then sent to off-site incineration either in a cement kiln or in a conventional waste solvent incinerator. The second alterna…	2018	10.1080/01496395.2018.1442858	Topic irrelevent
Mauko Pranjić A., Oprčkal P., Mladenovič A., Zapušek P., Urleb M., Turk J.	Comparative Life Cycle Assessment of possible methods for the treatment of contaminated soil at an environmentally degraded site	Journal of Environmental Management	This study reports on the assessment of the environmental sustainability of different management practices for an environmentally degraded site in Slovenia: the Old Zinc-Works in the town of Celje. Life Cycle Assessments (LCAs) were applied in order to evaluate possible trade-offs by comparing a proposed in situ remediation scenario with two other reclamation scenarios (scenario 2: incineration, …	2018	10.1016/j.jenvman.2018.04.051	Topic irrelevent
Sun M., Wang Y., Shi L.	Environmental performance of straw-based pulp making: A life cycle perspective	Science of the Total Environment	Agricultural straw-based pulp making plays a vital role in pulp and paper industry, especially in forest deficient countries such as China. However, the environmental performance of straw-based pulp has scarcely been studied. A life cycle assessment on wheat straw-based pulp making in China was conducted to fill of the gaps in comprehensive environmental assessments of agricultural straw-based pu…	2018	10.1016/j.scitotenv.2017.10.250	Topic irrelevent
Zhao Z.-L., Li W.-W., Wang F., Zhang Y.-Q.	Using of hydrated lime water as a novel degumming agent of silk and sericin recycling from wastewater	Journal of Cleaner Production	The aqueous solution of hydrated lime (calcium hydroxide) was first used as a silk-degumming/refining agent. The sericin outside silk fibroin filaments was completely removed after boiling (20 min × 2) in a 0.025% calcium hydroxide solution. The calcium hydroxide degumming did not induce an evident breakage of the silk fibroin peptide chains. The tensile, thermal and surface properties of the fib…	2018	10.1016/j.jclepro.2017.11.213	Not an LCA case study
Alexiades A., Kendall A., Winans K.S., Kaffka S.R.	Sugar beet ethanol (Beta vulgaris L.): A promising low-carbon pathway for ethanol production in California	Journal of Cleaner Production	This study examines sugar beet (Beta vulgaris L.) as a potential low carbon intensity (CI) fuel feedstock, assuming sugar beet production in California and simulating a facility that exemplifies opportunities for biofuel producers to reduce greenhouse gas emissions, improve fossil-fuel efficiency, and minimize waste. The strategies explored in this study—utilizing byproducts and agricultural resi…	2018	10.1016/j.jclepro.2017.05.059	Not an LCA case study
Esposito Corcione C., Palumbo E., Masciullo A., Montagna F., Torricelli M.C.	Fused Deposition Modeling (FDM): An innovative technique aimed at reusing Lecce stone waste for industrial design and building applications	Construction and Building Materials	Lecce Stone is an attractive and appreciated natural material, as well as a non-renewable resource. For thousands of years people have extracted it from the Salento quarries for use as an ornamental, celebrative or building material. The production chain of this stone, from extraction through to the finished product, results in a great deal of scraps produced in both solid and muddy form. In rece…	2018	10.1016/j.conbuildmat.2017.10.011	Not an LCA case study
Havukainen J., Uusitalo V., Koistinen K., Liikanen M., Horttanainen M.	Carbon footprint evaluation of biofertilizers	International Journal of Sustainable Development and Planning	The prevailing large-scale use of chemical fertilizers has been affecting environmental degradation. A broken nutrient cycle has caused problems worldwide, which are related to the question of how to feed 9 billion people by 2050 while limiting human operations within the planetary boundaries. I ndispensable nutrients, phosphorus (P) and nitrogen (N), often leak because of human activities, such …	2018	10.2495/SDP-V13-N8-1050-1060	Allocation
Fan Y., Guo E., Zhai Y., Chang A.C., Qiao Q., Kang P.	Life cycle energy analysis of reclaimed water reuse projects in Beijing	Water Environment Research	To illustrate the benefits of water reuse project, the process-based life cycle analysis (LCA) could be combined with input-output LCA to evaluate the water reuse project. Energy is the only evaluation parameter used in this study. Life cycle assessment of all energy inputs (LCEA) is completed mainly by the life cycle inventory (LCI), taking into account the full life cycle including the construc…	2018	10.2175/106143017X14902968254548	Topic irrelevent
Vadenbo C., Hellweg S., Astrup T.F.	Let's Be Clear(er) about Substitution: A Reporting Framework to Account for Product Displacement in Life Cycle Assessment	Journal of Industrial Ecology	The multifunctional character of resource recovery in waste management systems is commonly addressed through system expansion/substitution in life cycle assessment (LCA). Avoided burdens credited based on expected displacement of other product systems can dominate the overall results, making the underlying assumptions particularly important for the interpretation and recommendations. Substitution…	2017	10.1111/jiec.12519	Substitution methods investigation
Ikhlayel M.	Environmental impacts and benefits of state-of-the-art technologies for E-waste management	Waste Management	This study aims to evaluate the environmental impacts and benefits of state-of-the-art technologies for proper e-waste handling using Jordan as a case study. Life Cycle Assessment (LCA) was employed to evaluate five advanced management systems represent state-of-the-art treatment technologies, including sanitary landfilling; proper recycling of metals, materials, and precious metals (PMs); and in…	2017	10.1016/j.wasman.2017.06.038	Topic irrelevent
Déchaux C., Nitschelm L., Giard L., Bioteau T., Sessiecq P., Aissani L.	Development of the regionalised municipal solid waste incineration (RMWI) model and its application to France	International Journal of Life Cycle Assessment	Purpose: Incineration is mainly studied when municipal solid waste (MSW) treatment options are assessed in life cycle assessment case studies. A variety of incineration models have been used to create life cycle inventories (LCIs), but they often do not represent the technology and input waste composition of a given incineration situation. This article describes development of the regionalised mu…	2017	10.1007/s11367-017-1268-0	Topic irrelevent
Al-Ansari T., Korre A., Nie Z., Shah N.	Integration of greenhouse gas control technologies within the energy, water and food nexus to enhance the environmental performance of food production systems	Journal of Cleaner Production	The sustainability of food production systems is inherently linked with energy, water and food (EWF) resources directly and in-directly throughout their lifecycle. The understanding of the interdependencies between the three resource sectors in the context of food production can provide a measurable account for resource requirements, while meeting food security objectives. The energy, water and f…	2017	10.1016/j.jclepro.2017.06.097	Topic irrelevent
Saibuatrong W., Cheroennet N., Suwanmanee U.	Life cycle assessment focusing on the waste management of conventional and bio-based garbage bags	Journal of Cleaner Production	The development of bio-plastics significantly contributes to sustainable development in terms of the waste management aspects associated with lower environmental impact. To achieve the aim of this study the life cycle assessment (LCA) of garbage bags from cradle-to-grave is evaluated and compared. The materials to be studied in this paper are polyethylene (PE), biomass polyethylene from molasses …	2017	10.1016/j.jclepro.2017.05.006	Topic irrelevent
Coltro L., Marton L.F.M., Pilecco F.P., Pilecco A.C., Mattei L.F.	Environmental profile of rice production in Southern Brazil: A comparison between irrigated and subsurface drip irrigated cropping systems	Journal of Cleaner Production	Agricultural activities in 2005 accounted for 10–12% of the total global anthropogenic emissions of greenhouse gases (GHGs) and the majority of N2O and half of CH4 emissions. Therefore, mitigating GHG emissions in agriculture is fundamental to reduce its share of responsibility for the global climate change. Rice (paddy) is the second most important commodity worldwide, and rice cropping fields s…	2017	10.1016/j.jclepro.2016.09.207	Topic irrelevent
Bong C.P.C., Lim L.Y., Ho W.S., Lim J.S., Klemeš J.J., Towprayoon S., Ho C.S., Lee C.T.	A review on the global warming potential of cleaner composting and mitigation strategies	Journal of Cleaner Production	With the rapid population growth and industrial development in the fast developing countries, there is a significant increase in the production of waste. For instance, the municipal solid waste in Malaysia is expected to exceed 9 Mt/y by 2020 based on the current production rate of 1 kg−1 person−1. Approximately 90% of the waste is channelled into the landfill that can release a significant amoun…	2017	10.1016/j.jclepro.2016.07.066	Review
Yang Y., Campbell J.E.	Improving attributional life cycle assessment for decision support: The case of local food in sustainable design	Journal of Cleaner Production	Life cycle assessment (LCA) has become widely used to evaluate the environmental sustainability of products. It has been increasingly realized, however, that the conventional framework, attributional LCA (ALCA), may be inadequate for steering decision making. Here we show how ALCA can be improved for decision support if we recognize its limitations. Using local food production in the U.S. as a ca…	2017	10.1016/j.jclepro.2017.01.020	Topic irrelevent
Chang F.-C., Lin L.-D., Ko C.-H., Hsieh H.-C., Yang B.-Y., Chen W.-H., Hwang W.-S.	Life cycle assessment of bioethanol production from three feedstocks and two fermentation waste reutilization schemes	Journal of Cleaner Production	More than 95% of energy supplies for Taiwan are imported. Conversely, approximately 150,000 ha half-fallow and 50,000 ha fallow paddy fields exist because of increasing labor costs and competition from rice imports. The potential for energy crop production from such underutilized paddy fields merits significant attention. However, selecting crops for optimal environmental performance when produci…	2017	10.1016/j.jclepro.2016.12.024	Topic irrelevent
Basso D., Pavanetto R.	Greenpeat: An innovative sustainable material recovered from waste	Procedia Environmental Science, Engineering and Management	Greenpeat is a new sustainable material that can be produced from wet biodegradable organic waste, both solid and liquid, through a very efficient process, studied and developed by HBI Srl, an innovative startup founded by a researcher and an entrepreneur, who works in the field of the innovative green technologies. Greenpeat has been produced from agro-industrial organic by-products and optimize…	2017		Conference paper
Md Yunos N.S.H., Chu C.J., Baharuddin A.S., Mokhtar M.N., Sulaiman A., Rajaeifar M.A., Nabavi Larimi Y., Talebi A.F., Mohammed P.M.A., Aghbashlo M., Tabatabaei M.	Enhanced oil recovery and lignocellulosic quality from oil palm biomass using combined pretreatment with compressed water and steam	Journal of Cleaner Production	A large volume of oil palm empty fruit bunch (EFB) is generated as waste feedstock around the globe. This abundant waste containing 0.75% oil on average could be a promising feedstock for biodiesel production if oil recovery could be accomplished in an economically-viable and environmentally-friendly manner. To achieve that, a new method called High Pressure Water Spray (HPWS) system was introduc…	2017	10.1016/j.jclepro.2016.10.078	Topic irrelevent
Lausselet C., Cherubini F., Oreggioni G.D., del Alamo Serrano G., Becidan M., Hu X., Rørstad P.K., Strømman A.H.	Norwegian Waste-to-Energy: Climate change, circular economy and carbon capture and storage	Resources, Conservation and Recycling	Recently, the European Commission has adopted a Circular Economy package. In addition, climate change is regarded as a major global challenge, and the de-carbonization of the energy sector requires a massive transformation that involves an increase of renewable shares in the energy mix and the incorporation of carbon capture and storage (CCS) processes. Given all this strong new momentum, what wi…	2017	10.1016/j.resconrec.2017.07.025	System expansion
Ripa M., Fiorentino G., Giani H., Clausen A., Ulgiati S.	Refuse recovered biomass fuel from municipal solid waste. A life cycle assessment	Applied Energy	Waste disposal is a controversial issue in many European countries: concerns about potential health effects and land value loss as well as the fulfillment of the European Landfill Directive and Waste Framework Directive have significantly changed the way waste should be managed. An appropriate management of municipal solid waste (MSW) may allow a significant enhancement of efficiency in resources…	2017	10.1016/j.apenergy.2016.05.058	Topic irrelevent
Svanström M., Heimersson S., Peters G., Harder R., I'Ons D., Finnson A., Olsson J.	Life cycle assessment of sludge management with phosphorus utilisation and improved hygienisation in Sweden	Water Science and Technology	To provide input to sewage sludge management strategies that address expected new regulations in terms of hygienisation and phosphorus recovery in Sweden, an environmental life cycle assessment (LCA) was made. The LCA identified environmental hot spots for methods that may permit sludge or phosphorus from sludge to be applied on agricultural land. In particular, thermophilic digestion, pasteurisa…	2017	10.2166/wst.2017.073	Original report in Swedish
Soleimani M., Shahandashti M.	Comparative process-based life-cycle assessment of bioconcrete and conventional concrete	Journal of Engineering, Design and Technology	Purpose: Bioconcrete is widely believed to be environmentally beneficial over conventional concrete. However, the process of bioconcrete production involves several steps, such as waste recovery and treatment, that potentially present significant environmental impacts. Existing life-cycle assessments of bioconcrete are limited in the inventory and impact analysis; therefore, they do not consider …	2017	10.1108/JEDT-04-2017-0033	Topic irrelevent
Corrado S., Ardente F., Sala S., Saouter E.	Modelling of food loss within life cycle assessment: From current practice towards a systematisation	Journal of Cleaner Production	Food loss is a major concern from both environmental and social point of view. Life Cycle Assessment (LCA) has been largely applied to quantify the environmental impact of food and to identify pros and cons of different options for optimisation of food systems management, including the recovery of potential waste occurring along the supply chain. However, within LCA case studies, there is still a…	2017	10.1016/j.jclepro.2016.06.050	Topic irrelevent
Baglio L., Fichera A., Russo G., Amara G., Lombardo E.	Definition of price in circular raw materials in the disposal of hazardous industrial waste	Procedia Environmental Science, Engineering and Management	Greenpeat is a new sustainable material that can be produced from wet biodegradable organic waste, both solid and liquid, through a very efficient process, studied and developed by HBI Srl, an innovative startup founded by a researcher and an entrepreneur, who works in the field of the innovative green technologies. Greenpeat has been produced from agro-industrial organic by-products and optimize…	2017		Conference paper
Lausselet C., Cherubini F., del Alamo Serrano G., Becidan M., Strømman A.H.	Life-cycle assessment of a Waste-to-Energy plant in central Norway: Current situation and effects of changes in waste fraction composition	Waste Management	Waste-to-Energy (WtE) plants constitute one of the most common waste management options to deal with municipal solid waste. WtE plants have the dual objective to reduce the amount of waste sent to landfills and simultaneously to produce useful energy (heat and/or power). Energy from WtE is gaining steadily increasing importance in the energy mix of several countries. Norway is no exception, as en…	2016	10.1016/j.wasman.2016.09.014	Topic irrelevent
Morgan-Sagastume F., Heimersson S., Laera G., Werker A., Svanström M.	Techno-environmental assessment of integrating polyhydroxyalkanoate (PHA) production with services of municipal wastewater treatment	Journal of Cleaner Production	In this paper, the potential impacts in the techno-environmental performance of a municipal wastewater treatment plant with integrated mixed-microbial-culture polyhydroxyalkanoate (PHA) production are presented for the first time. A life cycle assessment was conducted based on mass and energy balances. The techno-environmental performance was evaluated for five wastewater treatment configurations…	2016	10.1016/j.jclepro.2016.08.008	Topic irrelevent
Thompson K.A., Shimabuku K.K., Kearns J.P., Knappe D.R.U., Summers R.S., Cook S.M.	Environmental Comparison of Biochar and Activated Carbon for Tertiary Wastewater Treatment	Environmental Science and Technology	Micropollutants in wastewater present environmental and human health challenges. Powdered activated carbon (PAC) can effectively remove organic micropollutants, but PAC production is energy intensive and expensive. Biochar adsorbents can cost less and sequester carbon; however, net benefits depend on biochar production conditions and treatment capabilities. Here, life cycle assessment was used to…	2016	10.1021/acs.est.6b03239	No nutrient substitution
Holloway R.W., Miller-Robbie L., Patel M., Stokes J.R., Munakata-Marr J., Dadakis J., Cath T.Y.	Life-cycle assessment of two potable water reuse technologies: MF/RO/UV-AOP treatment and hybrid osmotic membrane bioreactors	Journal of Membrane Science	A life cycle assessment tool and methodology were used to study two potable reuse treatment schemes: a full-advanced treatment (FAT) approach and a hybrid ultrafiltration osmotic membrane bioreactor (UFO-MBR). FAT combines conventional wastewater treatment followed by low-pressure membrane filtration, reverse osmosis (RO), and ultraviolet advanced oxidation processes (UV-AOP). The UFO-MBR couples…	2016	10.1016/j.memsci.2016.01.045	Topic irrelevent
Suárez S., Roca X., Gasso S.	Product-specific life cycle assessment of recycled gypsum as a replacement for natural gypsum in ordinary Portland cement: Application to the Spanish context	Journal of Cleaner Production	The construction industry consumes large quantities of natural resources and simultaneously generates a considerable amount of construction and demolition waste (CDW). This includes gypsum waste (GW), which must be managed correctly. Besides, the cement manufacturing process, which is part of the construction industry, has a high environmental impact. Therefore, the aim of this study was to recov…	2016	10.1016/j.jclepro.2016.01.044	Topic irrelevent
Kulczycka J., Kowalski Z., Smol M., Wirth H.	Evaluation of the recovery of Rare Earth Elements (REE) from phosphogypsum waste - Case study of the WIZÓW Chemical Plant (Poland)	Journal of Cleaner Production	More than 5 million tons of apatite phosphogypsum, a waste derived from the production of phosphoric acid, have been tipped on the waste tip of the Wizów Chemical Plant (Poland). This waste contains Rare Earth Elements (REE) which are on the list of 'critical' raw materials in the EU and other countries. This paper presents an evaluation of the industrial waste management solutions in the Wizów p…	2016	10.1016/j.jclepro.2015.11.039	Topic irrelevent
Sturtewagen L., De Soete W., Dewulf J., Lachat C., Lauryssen S., Heirman B., Rossi F., Schaubroeck T.	Resource use profile and nutritional value assessment of a typical Belgian meal, catered or home cooked, with pork or Quorn™ as protein source	Journal of Cleaner Production	The nutritional value of food and its environmental impact have received considerable attention, however an assessment of environmental sustainability of catered meals is lacking. We therefore assessed the nutritional value and resource consumption of a specific catered meal, pork tenderloin with potato croquettes, carrots and mushroom sauce ('Canteen Pork'). The outcomes are compared with that o…	2016	10.1016/j.jclepro.2015.09.006	Topic irrelevent
Choe J.K., Bergquist A.M., Jeong S., Guest J.S., Werth C.J., Strathmann T.J.	Performance and life cycle environmental benefits of recycling spent ion exchange brines by catalytic treatment of nitrate	Water Research	Salt used to make brines for regeneration of ion exchange (IX) resins is the dominant economic and environmental liability of IX treatment systems for nitrate-contaminated drinking water sources. To reduce salt usage, the applicability and environmental benefits of using a catalytic reduction technology to treat nitrate in spent IX brines and enable their reuse for IX resin regeneration were eval…	2015	10.1016/j.watres.2015.05.007	Topic irrelevent
Astrup T.F., Tonini D., Turconi R., Boldrin A.	Life cycle assessment of thermal Waste-to-Energy technologies: Review and recommendations	Waste Management	Life cycle assessment (LCA) has been used extensively within the recent decade to evaluate the environmental performance of thermal Waste-to-Energy (WtE) technologies: incineration, co-combustion, pyrolysis and gasification. A critical review was carried out involving 250 individual case-studies published in 136 peer-reviewed journal articles within 1995 and 2013. The studies were evaluated with …	2015	10.1016/j.wasman.2014.06.011	Review
Toniolo S., Mazzi A., Garato V.G., Aguiari F., Scipioni A.	Assessing the "design paradox" with life cycle assessment: A case study of a municipal solid waste incineration plant	Resources, Conservation and Recycling	One of the most important processes in an integrated waste management system is incineration, which, among the different waste management disposal options still remains a critical waste treatment system. New dynamics and approaches have to be developed to embrace such a wide and complex topic, and better knowledge and assessment of incineration are strategically significant to define future envir…	2014	10.1016/j.resconrec.2014.08.001	Topic irrelevent
Ferreira S., Cabral M., da Cruz N.F., Simões P., Marques R.C.	Life cycle assessment of a packaging waste recycling system in Portugal	Waste Management	Life Cycle Assessment (LCA) has been used to assess the environmental impacts associated with an activity or product life cycle. It has also been applied to assess the environmental performance related to waste management activities. This study analyses the packaging waste management system of a local public authority in Portugal. The operations of selective and refuse collection, sorting, recycl…	2014	10.1016/j.wasman.2014.05.007	Topic irrelevent
Zhang P., Chang C.-C., Wang R., Zhang S.	Agricultural waste	Water Environment Research	A large amount of agricultural waste was generated all over the world, which could cost many problems such as environment pollution, GHG (greenhouse gas) emission, and serious disease. A review of the literature published in 2013 on topics relating to agricultural waste issues is presented, and about 180 papers were selected. The main treatment methods of agricultural waste can be biodegradation,…	2014	10.2175/106143014X14031280667930	Review
Galgani P., van der Voet E., Korevaar G.	Composting, anaerobic digestion and biochar production in Ghana. Environmental-economic assessment in the context of voluntary carbon markets	Waste Management	In some areas of Sub-Saharan Africa appropriate organic waste management technology could address development issues such as soil degradation, unemployment and energy scarcity, while at the same time reducing emissions of greenhouse gases. This paper investigates the role that carbon markets could have in facilitating the implementation of composting, anaerobic digestion and biochar production, i…	2014	10.1016/j.wasman.2014.07.027	System expansion
Martinez-Hernandez E., Martinez-Herrera J., Campbell G.M., Sadhukhan J.	Process integration, energy and GHG emission analyses of Jatropha-based biorefinery systems	Biomass Conversion and Biorefinery	Driven by the need to develop a wide variety of products with low environmental impact, biorefineries need to emerge as highly integrated facilities. This becomes effective when overall mass and energy integration through a centralised utility system design is undertaken. An approach combining process integration, energy and greenhouse gas (GHG) emission analyses is shown in this paper for Jatrop…	2014	10.1007/s13399-013-0105-3	No nutrient substitution
Ye S.Y., Bounaceur A., Soudais Y., Barna R.	Parameter optimization of the steam thermolysis: A process to recover carbon fibers from polymer-matrix composites	Waste and Biomass Valorization	Life cycle assessment has confirmed the effectiveness of carbon fiber reinforced polymer-matrix composite (CFRP) materials' application in CO 2 reduction as well as in weight reduction (JCMA in 2008). Thanks to these strong and ultimate lightweight structure materials, burdens imposed by vehicles on environment nowadays could be significantly relieved. However, speedy manufacturing and recycle te…	2013	10.1007/s12649-013-9220-4	Topic irrelevent
Guo M., Stuckey D.C., Murphy R.J.	End-of-life of starch-polyvinyl alcohol biopolymers	Bioresource Technology	This study presents a life cycle assessment (LCA) model comparing the waste management options for starch-polyvinyl alcohol (PVOH) biopolymers including landfill, anaerobic digestion (AD), industrial composting and home composting. The ranking of biological treatment routes for starch-PVOH biopolymer wastes depended on their chemical compositions. AD represents the optimum choice for starch-PVOH …	2013	10.1016/j.biortech.2012.09.093	Topic irrelevent
Rochat D., Binder C.R., Diaz J., Jolliet O.	Combining material flow analysis, life cycle assessment, and multiattribute utility theory: Assessment of end-of-life scenarios for polyethylene terephthalate in Tunja, Colombia Rochat et al. Combining MFA, LCA, and MAUT	Journal of Industrial Ecology	Summary: Three assessment methods, material flow analysis (MFA), life cycle analysis (LCA), and multiattribute utility theory (MAUT) are systematically combined for supporting the choice of best end-of-life scenarios for polyethylene terephthalate (PET) waste in a municipality of a developing country. MFA analyzes the material and energy balance of a firm, a region, or a nation, identifying the m…	2013	10.1111/jiec.12025	Topic irrelevent
James K.	An investigation of the relationship between recycling paper and card and greenhouse gas emissions from land use change	Resources, Conservation and Recycling	In life cycle assessment (LCA) of paper products, it is common to either assume that the carbon impacts of forestry are neutral (i.e. no net emissions) or to credit harvested wood products as a carbon store. When comparing virgin and recycled materials, this means that forest carbon flows are either shown as nil or a net sequestration credit. However, harvested wood products typically account for…	2012	10.1016/j.resconrec.2012.07.003	Topic irrelevent
Rostkowski K.H., Criddle C.S., Lepech M.D.	Cradle-to-gate life cycle assessment for a cradle-to-cradle cycle: Biogas-to-bioplastic (and back)	Environmental Science and Technology	At present, most synthetic organic materials are produced from fossil carbon feedstock that is regenerated over time scales of millions of years. Biobased alternatives can be rapidly renewed in cradle-to-cradle cycles (1-10 years). Such materials extend landfill life and decrease undesirable impacts due to material persistence. This work develops a LCA for synthesis of polyhydroxybutyrate (PHB) f…	2012	10.1021/es204541w	Topic irrelevent
Fantin V., Buttol P., Pergreffi R., Masoni P.	Life cycle assessment of Italian high quality milk production. A comparison with an EPD study	Journal of Cleaner Production	An LCA study on the production of an Italian brand of high quality milk (bottled in 1 l Tetra Top ®) was carried out in compliance with the Product Category Rules for milk of the International EPD ® System. The results were compared with the registered environmental product declaration (EPD) of another brand of milk. The most relevant source of differences between the two studies is the choice of…	2012	10.1016/j.jclepro.2011.10.017	Topic irrelevent
Cellura M., Ardente F., Longo S.	From the LCA of food products to the environmental assessment of protected crops districts: A case-study in the south of Italy	Journal of Environmental Management	In the present study, Life Cycle Assessment (LCA) methodology was applied to evaluate the energy consumption and environmental burdens associated with the production of protected crops in an agricultural district in the Mediterranean region. In this study, LCA was used as a 'support tool', to address local policies for sustainable production and consumption patterns, and to create a 'knowledge ba…	2012	10.1016/j.jenvman.2011.08.019	Topic irrelevent
Barberio G., Buttol P., Masoni P., Scalbi S., Andreola F., Barbieri L., Lancellotti I.	Use of Incinerator Bottom Ash for Frit Production	Journal of Industrial Ecology	This article presents the results of an experimental activity aimed at investigating the technical feasibility and the environmental performance of using municipal solid waste incineration bottom ash to produce glass frit for ceramic glaze (glaze frit). The process includes an industrial pretreatment of bottom ash that renders the material suitable for use in glaze frit production and allows reco…	2010	10.1111/j.1530-9290.2010.00224.x	Topic irrelevent
Martínez-Blanco J., Muñoz P., Antón A., Rieradevall J.	Life cycle assessment of the use of compost from municipal organic waste for fertilization of tomato crops	Resources, Conservation and Recycling	Several authors have assessed the positive repercussions of compost application in soil and the benefits of composting process, although most previous works focused only on a specific aspect of the whole life cycle of compost. The aim of this paper was to determine the environmental impacts associated to the use of compost, from the collection of organic municipal solid waste to its application t…	2009	10.1016/j.resconrec.2009.02.003	No nutrient substitution
Apisitpuvakul W., Piumsomboon P., Watts D.J., Koetsinchai W.	LCA of spent fluorescent lamps in Thailand at various rates of recycling	Journal of Cleaner Production	This paper presents environmental impact of a fluorescent lamp (a long straight tube 36 watts, 200 g and 13,600 h for mean time before failure) when considering different disposal methods (recycle and non-recycle) of its spent fluorescent lamp (SFL). The study was applied for the case in Thailand using life cycle assessment (LCA) as a tool. All materials, energy use, and pollutant emissions to th…	2008	10.1016/j.jclepro.2007.06.015	Topic irrelevent
Liamsanguan C., Gheewala S.H.	Environmental assessment of energy production from municipal solid waste incineration	International Journal of Life Cycle Assessment	Background, Aims and Scope. During the combustion of municipal solid waste (MSW), energy is produced which can be utilized to generate electricity. However, electricity production from incineration has to be evaluated from the point view of the environmental performance. In this study, environmental impacts of electricity production from waste incineration plant in Thailand are compared with thos…	2007	10.1065/lca2006.10.278	Topic irrelevent
Ogino A., Hirooka H., Ikeguchi A., Tanaka Y., Waki M., Yokoyama H., Kawashima T.	Environmental impact evaluation of feeds prepared from food residues using life cycle assessment	Journal of Environmental Quality	There is increasing concern about feeds prepared from food residues (FFR) from an environmental viewpoint; however, various forms of energy are consumed in the production of FFR. Environmental impacts of three scenarios were therefore investigated and compared using life cycle assessment (LCA): production of liquid FFR by sterilization with heat (LQ), production of dehydrated FFR by dehydration (…	2007	10.2134/jeq2006.0326	Topic irrelevent
Mendes M.R., Aramaki T., Hanaki K.	Comparison of the environmental impact of incineration and landfilling in São Paulo City as determined by LCA	Resources, Conservation and Recycling	Life cycle assessment was employed to compare the environmental impact of incineration and the landfilling of municipal solid waste in São Paulo City, Brazil. Incineration with energy recovery and landfilling treatment systems were assessed in five different scenarios. Three incineration scenarios with different ash treatment systems were evaluated: incineration with ash disposal, with ash meltin…	2004	10.1016/j.resconrec.2003.08.003	Topic irrelevent
Lundin M.	Indicators for measuring the sustainability of urban water systems - A life cycle approach	Doktorsavhandlingar vid Chalmers Tekniska Hogskola	Methods were developed that measure and assess the sustainability of urban water systems. A first set of environmental sustainability indicators (ESIs) was constructed, covering technical and environmental aspects, with a division within traditional water resources and process boundaries. Application of the ESIs in case studies in Goteborg, Sweden and King William's Town, South Africa revealed th…	2003		Doctoral thesis
Bengtsson M.	Facts and interpretations in environmental assessments of products	Doktorsavhandlingar vid Chalmers Tekniska Hogskola	Contemporary environmental discourse increasingly emphasises environmental impacts associated with products. In response to this attention, methods for assessing the impacts of products over their life cycles, life cycle assessment (LCA), have been devised. Since LCAs generally involve judgements that cannot be science based, such as comparisons of environmental impacts (weighting), they leave ro…	2002		Doctoral thesis

## Sheet: dropdown list
		SR principle	Type	Factor
		Single constraining factor	Internal	PNA
		Aggregated constraining factor	Internal + External-Environmental	Content-based
		?	External-Societal	Improved-effect
			/	Equivalent quality
			Internal + External-Societal	Duration of fertilizer effect
			External-Environmental	Soil nutrient demand
			Internal + External-Environmental-Societal	Crop nutrient demand
				User behavior
				MFE
				Maintenance substitution principle
				Simulation models
				Recommendation/Regulation
				/
				PNA + User behavior
				PNA+Regulation
